# Supplementary material for: Organic photoredox-catalyzed oxidative azolation of unactivated fluoroarenes
Source: Royal Society of Chemistry journal article supplement (doi:10.1039/d3ob01041d), 2023-01-01

## **Organic photoredox-catalyzed oxidative azolation of unactivated fluoroarenes**

Guodong Ju,<sup>‡</sup> <sup>a</sup> Yalong Li,<sup>‡</sup> <sup>a</sup> Yingsheng Zhao<sup>a,b\*</sup>

<sup>a</sup>Key Laboratory of Organic Synthesis of Jiangsu Province, College of Chemistry, Chemical Engineering and Materials Science Soochow University, Suzhou 215123 (PR China).

<sup>b</sup>School of Chemistry and Chemical Engineering, Henan Normal University, Xinxiang 453000, P. R. China

\*E-mail: yszhao@suda.edu.cn

## *Supporting Information*

|                                                             |            |
|-------------------------------------------------------------|------------|
| <b>1. Reagents .....</b>                                    | <b>S1</b>  |
| <b>2. Instruments.....</b>                                  | <b>S1</b>  |
| <b>3. Optimization of reaction conditions .....</b>         | <b>S1</b>  |
| <b>4. General procedure for the synthesis of 3a-3q.....</b> | <b>S3</b>  |
| <b>5. General procedure for the synthesis of 4a-4i.....</b> | <b>S3</b>  |
| <b>6. Gram-scale synthesis of 3a .....</b>                  | <b>S4</b>  |
| <b>7. Control experiment.....</b>                           | <b>S5</b>  |
| <b>8. Fluorescence Quenching Experiments .....</b>          | <b>S6</b>  |
| <b>9. Characterization data of products .....</b>           | <b>S14</b> |
| <b>10. References .....</b>                                 | <b>S25</b> |
| <b>11. NMR spectra.....</b>                                 | <b>S26</b> |

## **1. Reagents**

Unless otherwise noted, all reagents were purchased from commercial suppliers and used without further purification. Column chromatography purifications were performed using 200–300 mesh silica gel.

## **2. Instruments**

NMR spectra were recorded on Varian Inova-400 MHz, Inova-300 MHz, Bruker DRX-400 or Bruker DRX-500 instruments and calibrated using residual solvent peaks as internal reference. Multiplicities are recorded as: s = singlet, d = doublet, t = triplet, q = quartet, dd = doublet of doublets, m = multiplet. HRMS analysis were carried out using a Bruker micrOTOF-Q instrument or a TOF-MS instrument. LC-MS analysis carried out using a Agilent Technologies 1260 Zinfinity. The fluorescence quenching experiment was carried out on Hitachi F-2500 fluorescence spectrophotometer. The reactor was 3.0 cm from 40 W blue LEDs.

### 3. Optimization of reaction conditions

Table S-1: Influence of photocatalyst and reaction atmosphere<sup>a</sup>

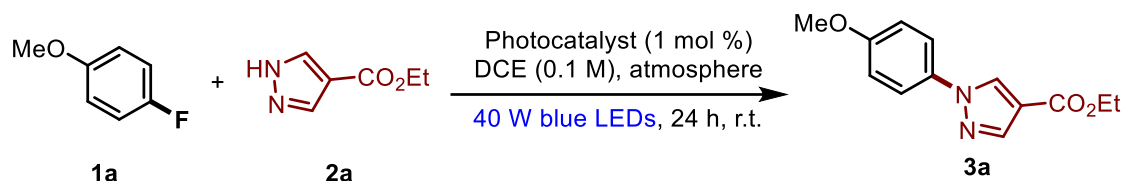

| Entry           | Photocatalyst                                                    | Atmosphere     | Solvent | Yield (%) <sup>b</sup> |
|-----------------|------------------------------------------------------------------|----------------|---------|------------------------|
| 1 <sup>c</sup>  | TPT                                                              | Air            | DCE     | 22                     |
| 2               | <i>fac</i> -Ir(ppy) <sub>3</sub>                                 | Air            | DCE     | 0                      |
| 3               | Ir(df(CF <sub>3</sub> )ppy) <sub>2</sub> (dtbbpy)PF <sub>6</sub> | Air            | DCE     | 0                      |
| 4               | Ir(ppy) <sub>2</sub> (dtbbpy)PF <sub>6</sub>                     | Air            | DCE     | 0                      |
| 5               | Ru(bpy) <sub>3</sub> Cl <sub>2</sub>                             | Air            | DCE     | 0                      |
| 6               | Fluorescein                                                      | Air            | DCE     | 0                      |
| 7               | Eosin Y                                                          | Air            | DCE     | 0                      |
| 8               | DDQ                                                              | Air            | DCE     | trace                  |
| 9 <sup>c</sup>  | TPT                                                              | Ar             | DCE     | 18                     |
| 10 <sup>c</sup> | TPT                                                              | O <sub>2</sub> | DCE     | 35                     |

<sup>a</sup>Reaction conditions: **1a** (0.1 mmol), **2a** (3.0 equiv), Photocatalyst (1 mol %), DCE (1 mL) at room temperature using irradiation with 40 W blue LEDs for 24 h. <sup>b</sup>Isolated yields. <sup>c</sup>Photocatalyst (10 mol %).

**Table S-2: Influence of additives and solvent<sup>a</sup>**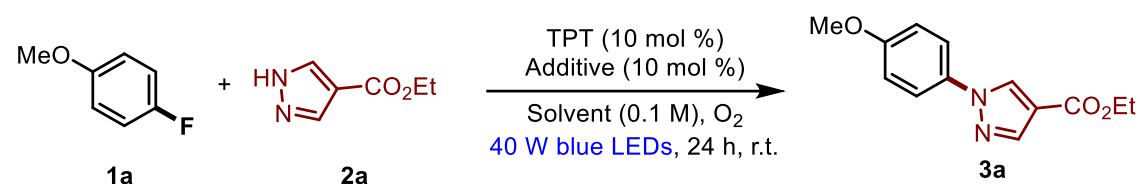

| Entry           | Photocatalyst | Additive             | Atmosphere     | Solvent          | Yield (%) <sup>b</sup> |
|-----------------|---------------|----------------------|----------------|------------------|------------------------|
| 1               | TPT           | AgSbF <sub>6</sub>   | O <sub>2</sub> | DCE              | 24                     |
| 2               | TPT           | Fe(OTf) <sub>2</sub> | O <sub>2</sub> | DCE              | 19                     |
| 3               | TPT           | Cu(OTf) <sub>2</sub> | O <sub>2</sub> | DCE              | 62                     |
| 4               | TPT           | CuCl <sub>2</sub>    | O <sub>2</sub> | DCE              | 27                     |
| 5               | TPT           | CuO                  | O <sub>2</sub> | DCE              | 11                     |
| 6               | TPT           | CuI                  | O <sub>2</sub> | DCE              | 22                     |
| 7               | TPT           | CuBr                 | O <sub>2</sub> | DCE              | 26                     |
| 8               | TPT           | Cu(OTf) <sub>2</sub> | O <sub>2</sub> | MeCN             | trace                  |
| 9               | TPT           | Cu(OTf) <sub>2</sub> | O <sub>2</sub> | DMF              | trace                  |
| 10              | TPT           | Cu(OTf) <sub>2</sub> | O <sub>2</sub> | DMSO             | trace                  |
| 11              | TPT           | Cu(OTf) <sub>2</sub> | O <sub>2</sub> | HFIP             | 14                     |
| 12              | TPT           | Cu(OTf) <sub>2</sub> | O <sub>2</sub> | <i>n</i> -hexane | 17                     |
| 13              | TPT           | Cu(OTf) <sub>2</sub> | O <sub>2</sub> | DCM              | 67                     |
| 14 <sup>c</sup> | TPT           | Cu(OTf) <sub>2</sub> | O <sub>2</sub> | DCM              | 78                     |

<sup>a</sup>Reaction conditions: **1a** (0.1 mmol), **2a** (3.0 equiv), TPT (10 mol %), Additive (10 mol %), Solvent (1 mL) at room temperature using irradiation with 40 W blue LEDs for 24 h. <sup>b</sup>Isolated yields. <sup>c</sup>Reaction for 48 h.

#### 4. General procedure for the synthesis of 3a-3q

The photochemical reaction setup is shown in Fig. S1. All the reactions were carried out under the blue light irradiation using a Geao Chemical 450-460 nm lamp. Ambient temperature throughout the course of the reaction was maintained by a cooling fan. The reaction vial was placed proximately 3-5 cm away from the Kessillight source (Fig. S1)

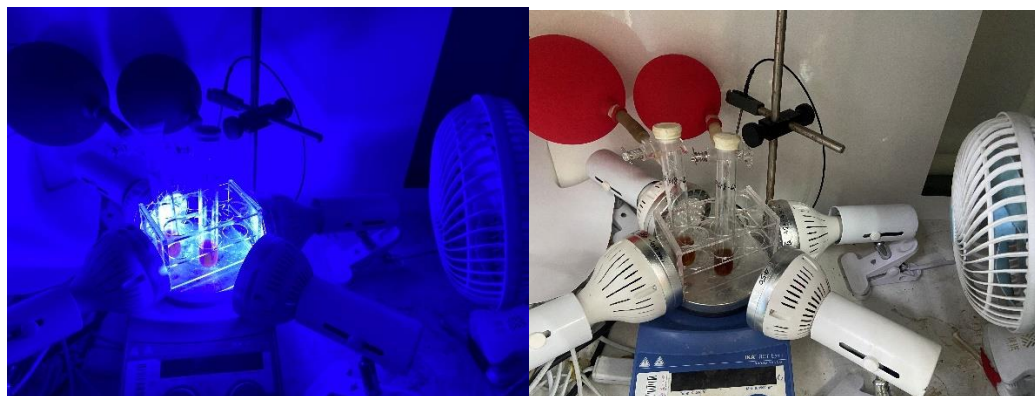

Figure S1: Photochemical reaction setup

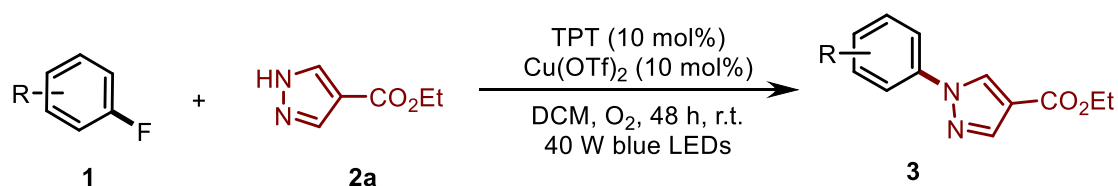

A dried 25 mL Schlenk tube equipped with a magnetic stir bar was charged with 4-fluoroanisole derivatives **1** (0.1 mmol, 1.0 equiv), ethyl 1H-pyrazole-4-carboxylate **2a** (0.3 mmol, 3.0 equiv), TPT (4.0 mg, 10.0 mol%), Cu(OTf)<sub>2</sub> (3.6 mg, 10 mol%), and DCM (1.0 mL). The tube was evacuated and backfilled with oxygen atmosphere (three times), then the mixture was stirred and irradiated by a 40 W blue LED at room temperature for 48 h. After the indicated reaction time, the mixture was concentrated to yield the crude product, which was further purified by flash chromatography (silica gel, petroleum ether/ethyl acetate = 5:1-20:1) to give the product **3**.

#### 5. General procedure for the synthesis of 4a-4i

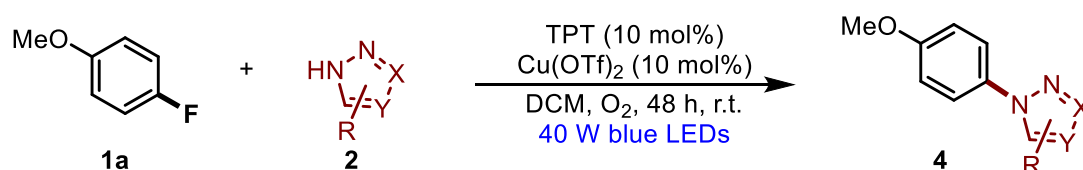

A dried 25 mL Schlenk tube equipped with a magnetic stir bar was charged with 4-fluoroanisole **1a** (0.1 mmol, 12.6 mg, 1.0 equiv), pyrazole derivatives **2** (0.3 mmol, 3.0 equiv), TPT (4.0 mg, 10.0 mol%), Cu(OTf)<sub>2</sub> (3.6 mg, 10 mol%), and DCM (1.0 mL). The tube was evacuated and backfilled with oxygen atmosphere (three times), then the mixture was stirred and irradiated by a 40 W blue LED at room temperature for 48 h. After the indicated reaction time, the mixture was concentrated to yield the crude product, which was further purified by flash chromatography (silica gel, petroleum ether/ethyl acetate = 5:1-20:1) to give the product **4**.

## 6. Gram-scale synthesis of **3a**

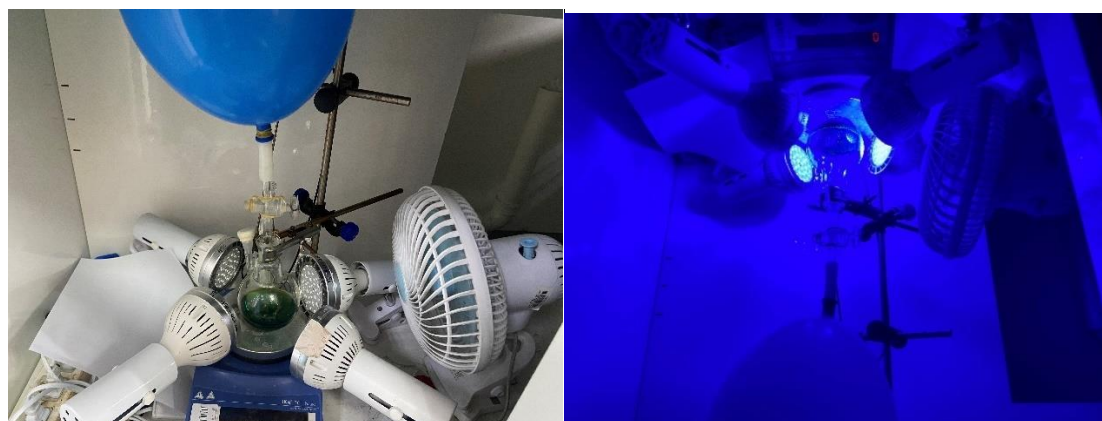

Figure S2: Photochemical reaction setup

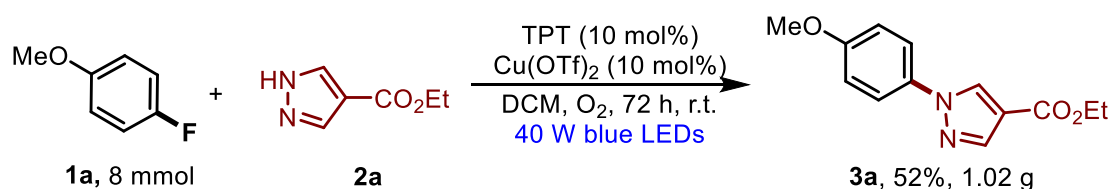

A dried 200 mL round-bottomed flask equipped with a magnetic stir bar was charged with 4-fluoroanisole derivatives **1a** (8.0 mmol, 1.0 equiv), ethyl 1H-pyrazole-4-carboxylate **2a** (24.0 mmol, 3.0 equiv), TPT (320 mg, 10.0 mol%), Cu(OTf)<sub>2</sub> (288 mg, 10 mol%), and DCM (50 mL). The round-bottomed flask was evacuated and backfilled with oxygen atmosphere (three times), then the mixture was stirred and irradiated by 4 × 40 W blue LEDs at room temperature for 72 h. The reaction mixture was washed with water and extracted with ethyl acetate three times. The combined organic layer was washed with saturated NaCl solution, dried with anhydrous Na<sub>2</sub>SO<sub>4</sub>, and filtered. The filtrate was concentrated in vacuo. The crude product was purified by flash column

chromatography on silica gel (petroleum ether/EtOAc) to afford desired product **3a** (1.02 g) in 52% yield.

## 7. Control experiment

### 7.1 Reaction without photocatalyst

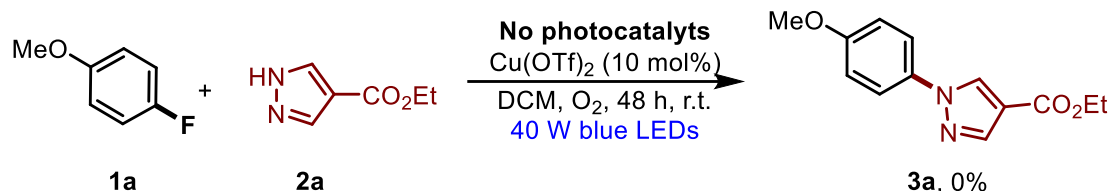

A dried 25 mL Schlenk tube equipped with a magnetic stir bar was charged with 4-fluoroanisole **1a** (0.1 mmol, 12.6 mg, 1.0 equiv), ethyl 1H-pyrazole-4-carboxylate **2a** (0.3 mmol, 3.0 equiv), Cu(OTf)<sub>2</sub> (3.6 mg, 10 mol%), and DCM (1.0 mL). The tube was evacuated and backfilled with oxygen atmosphere (three times), then the mixture was stirred and irradiated by a 40 W blue LED at room temperature for 48 h. <sup>1</sup>H NMR showed no formation of the desired product, indicating that a photocatalyst was required for conversion.

### 7.2 Reaction without light

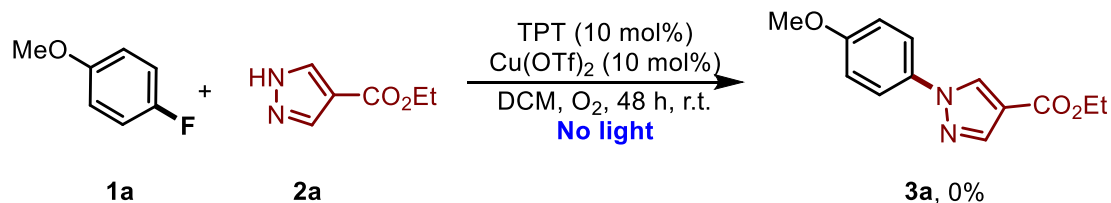

A dried 25 mL Schlenk tube equipped with a magnetic stir bar was charged with 4-fluoroanisole **1a** (0.1 mmol, 12.6 mg, 1.0 equiv), ethyl 1H-pyrazole-4-carboxylate **2a** (0.3 mmol, 3.0 equiv), TPT (4.0 mg, 10.0 mol%), Cu(OTf)<sub>2</sub> (3.6 mg, 10 mol%), and DCM (1.0 mL). The tube was evacuated and backfilled with oxygen atmosphere (three times), then the mixture was stirred at room temperature for 48 h. <sup>1</sup>H NMR showed no formation of the desired product, indicating that the light's was required for conversion.

### 7.3 Reaction with TEMPO

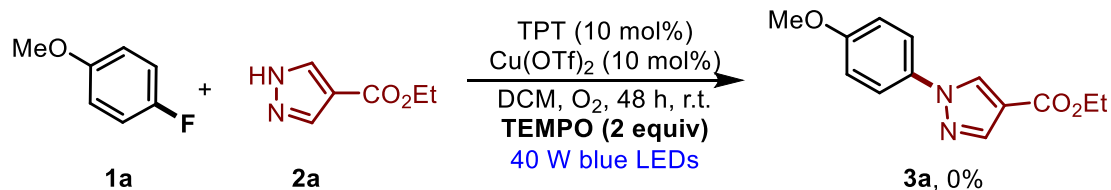



A dried 25 mL Schlenk tube equipped with a magnetic stir bar was charged with 4-fluoroanisole **1a** (0.1 mmol, 12.6 mg, 1.0 equiv), ethyl 1H-pyrazole-4-carboxylate **2a** (0.3 mmol, 3.0 equiv), Cu(OTf)<sub>2</sub> (3.6 mg, 10 mol%), and DCM (1.0 mL). The tube was evacuated and backfilled with oxygen atmosphere (three times), then the mixture was stirred and irradiated by a 40 W blue LED at room temperature for 48 h. <sup>1</sup>H NMR shows no desired product formation suggesting that the reaction proceeds through the radical mechanism.

#### 7.4 Reaction without O<sub>2</sub>

d) Reaction without O<sub>2</sub>

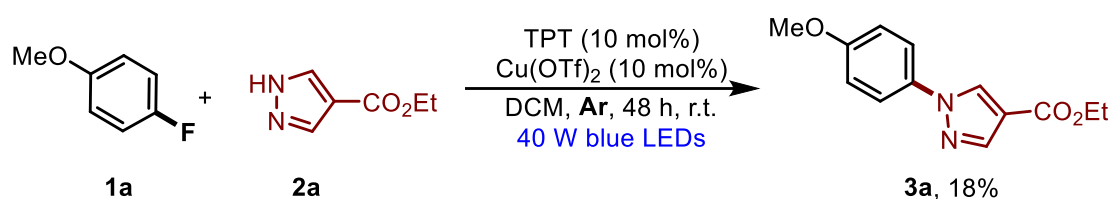

A dried 25 mL Schlenk tube equipped with a magnetic stir bar was charged with 4-fluoroanisole **1a** (0.1 mmol, 1.0 equiv), ethyl 1H-pyrazole-4-carboxylate **2a** (0.3 mmol, 3.0 equiv), TPT (4.0 mg, 10.0 mol%), Cu(OTf)<sub>2</sub> (3.6 mg, 10 mol%), and DCM (1.0 mL). The tube was evacuated and backfilled with Ar atmosphere (three times), then the mixture was stirred and irradiated by a 40 W blue LED at room temperature for 48 h. After the indicated reaction time, the mixture was concentrated to yield the crude product, which was further purified by flash chromatography (silica gel, petroleum ether/ethyl acetate = 5:1-20:1) to give the product **3a** (4.4 mg).

## 8. Mechanism experiment

### 8.1 Fluorescence Quenching Experiments<sup>[1]</sup>

Test conditions for quenching reaction ( $I_0$  and  $I$  are respective fluorescence intensities in the absence and presence of the indicated concentrations of the quenchers):

**TPT**: 1.6 mg dissolved in 50 mL DCM (0.00008 M)

Quencher: 36.2 mg of **Cu(OTf)<sub>2</sub>** dissolved in 25 mL DCM (0.004 M)

14.1 mg of **2a** dissolved in 25 mL DCM (0.004 M)

12.6 mg of **1a** dissolved in 25 mL DCM (0.004 M)

### General procedure:

1 mL of prepared solution containing TPT was added to a cuvette, keep the total volume at 4 mL, **Quenchers** and DCM were added as the following table:

| Entry | TPT  | Quencher | DCM     | Concentration of quencher |
|-------|------|----------|---------|---------------------------|
| 1     | 1 mL | 0 mL     | 3 mL    | 0 M                       |
| 2     | 1 mL | 0.25 mL  | 2.75 mL | $2.5 \times 10^{-4}$ M    |
| 3     | 1 mL | 0.5 mL   | 2.5 mL  | $5.0 \times 10^{-4}$ M    |
| 4     | 1 mL | 0.75 mL  | 2.25 mL | $7.5 \times 10^{-4}$ M    |
| 5     | 1 mL | 1 mL     | 2 mL    | $1 \times 10^{-3}$ M      |

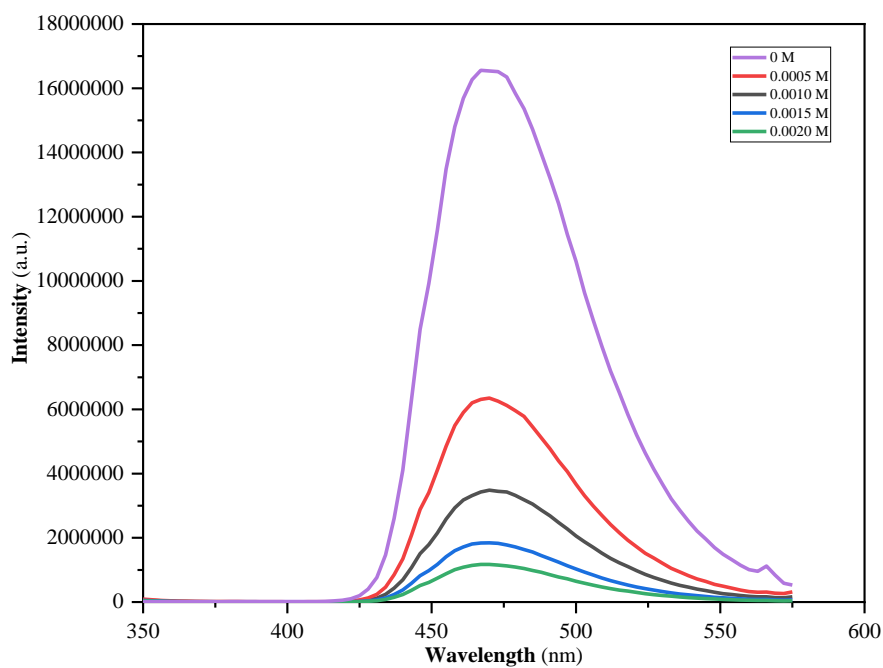

Figure S-1. Fluorescence quenching experiments with **1a**

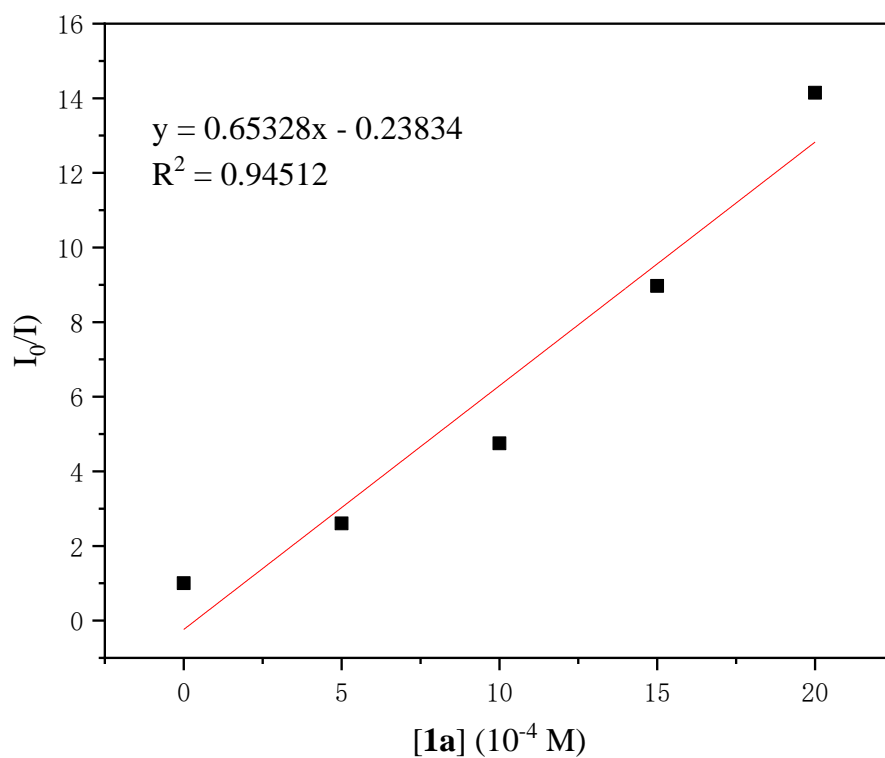

Figure S-2. Stern-Volmer plots of **1a**

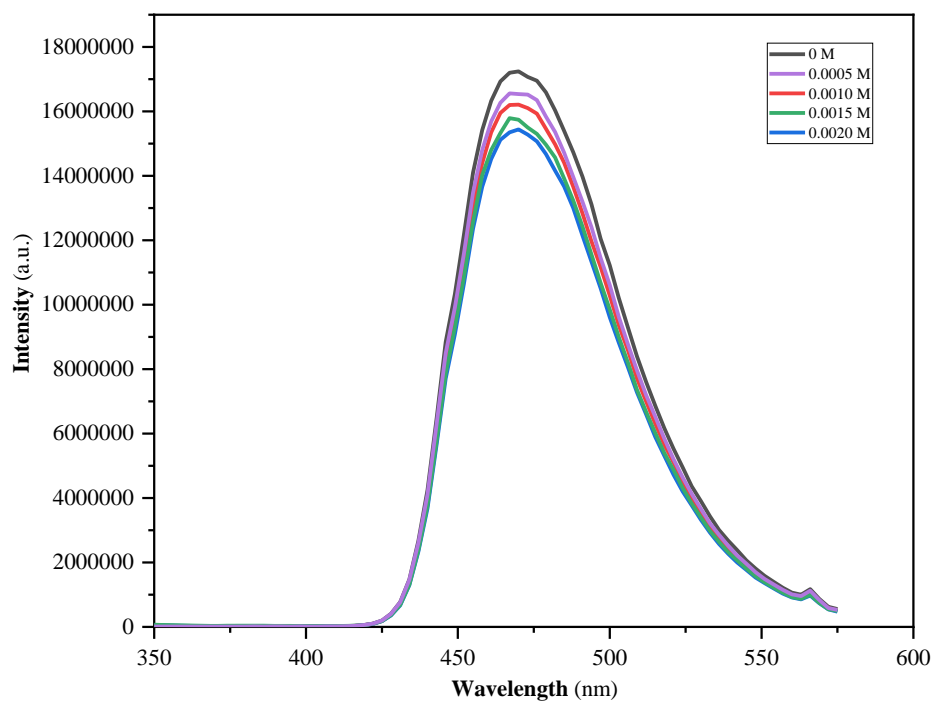

Figure S-3. Fluorescence quenching experiments with **2a**

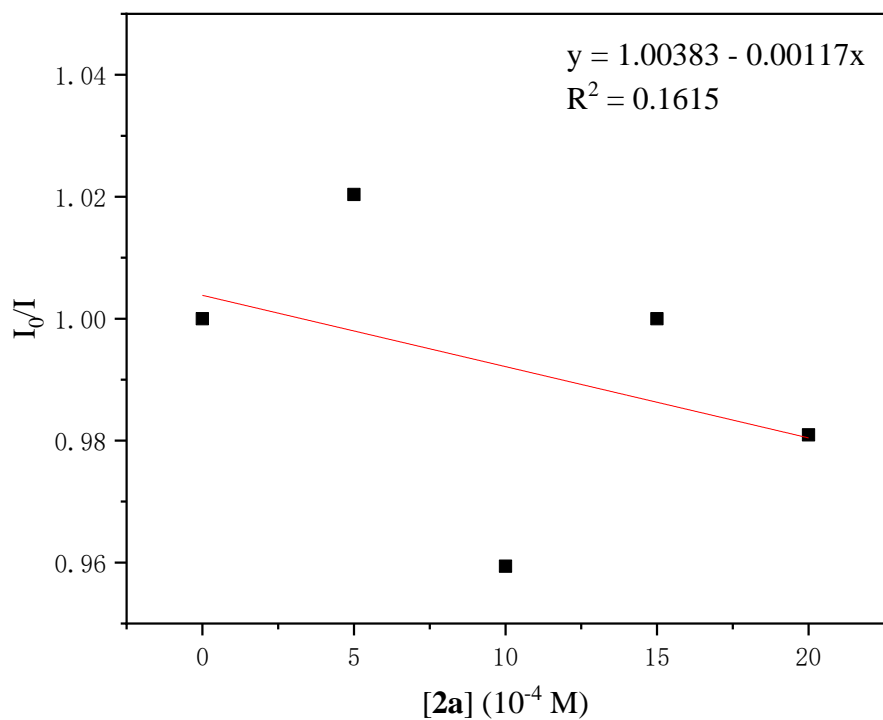

Figure S-4. Stern-Volmer plots of **2a**

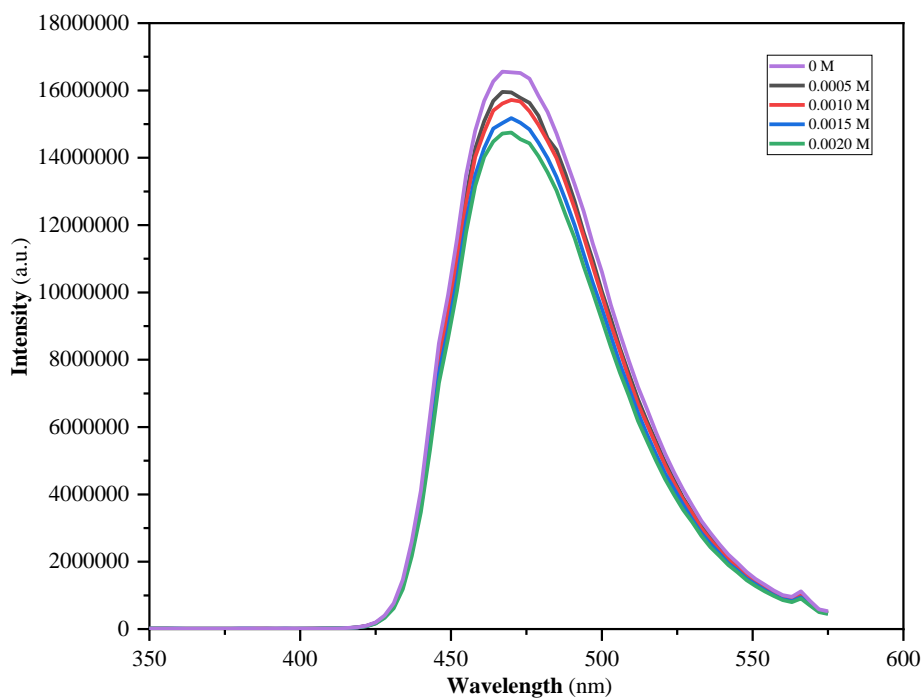

Figure S-5. Fluorescence quenching experiments with  $\text{Cu}(\text{OTf})_2$

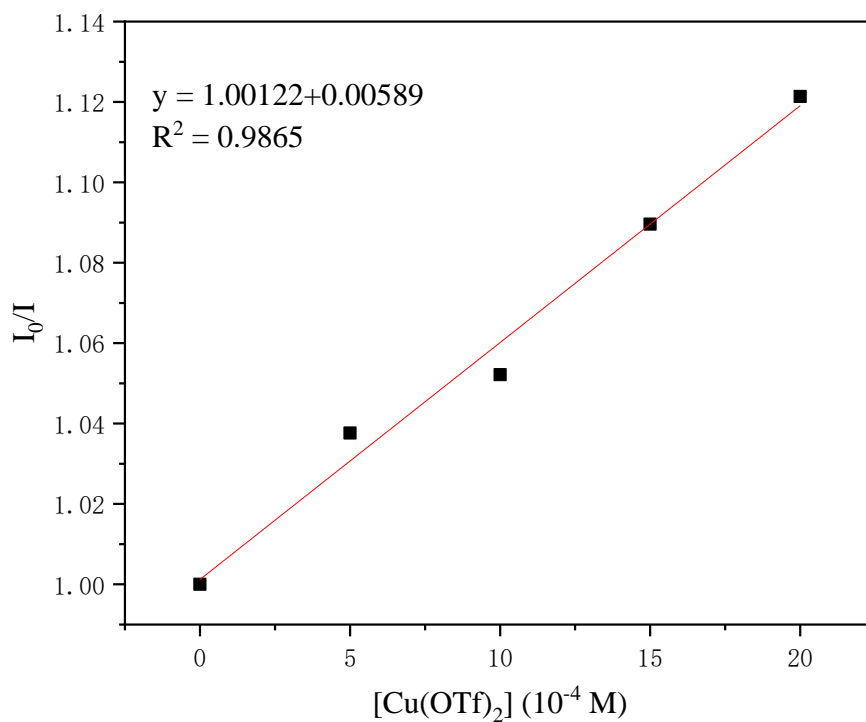

Figure S-6. Stern-Volmer plots of Cu(OTf)<sub>2</sub>

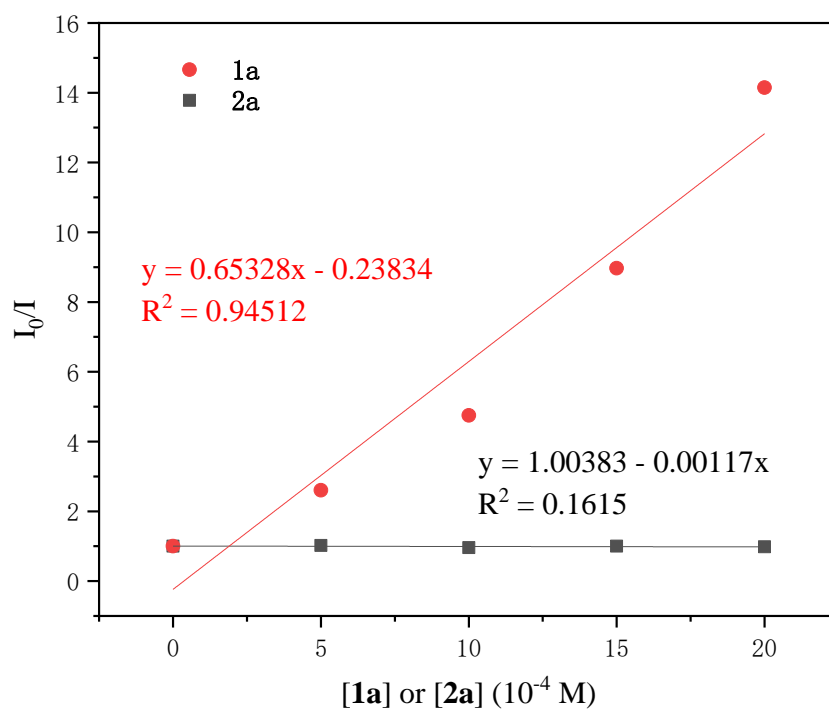

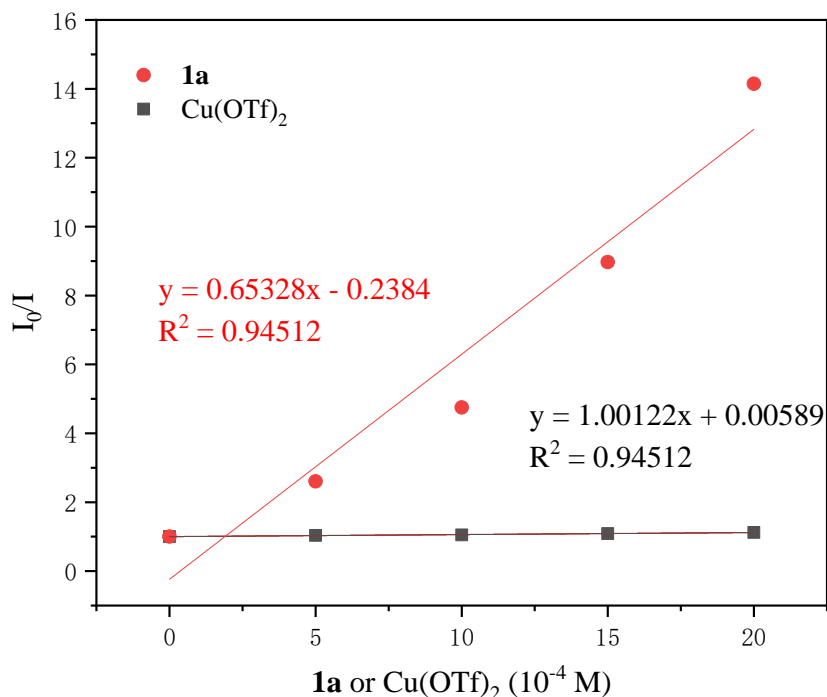

Figure S-7. Quenching efficiency of **1a**, **2a**, and  $\text{Cu}(\text{OTf})_2$

**Inference:** The results can clearly show that **1a** quench TPT more effectively than that of **2a** and  $\text{Cu}(\text{OTf})_2$

## 8.2 Light ON-OFF experiment

Eight standard reaction mixtures were added to six dry 25 ml Schlenk tubes. A dried 25 mL Schlenk tube equipped with a magnetic stir bar was charged with 4-fluoroanisole **1a** (0.1 mmol, 1.0 equiv), ethyl 1H-pyrazole-4-carboxylate **2a** (0.3 mmol, 3.0 equiv), TPT (4.0 mg, 10.0 mol%),  $\text{Cu}(\text{OTf})_2$  (3.6 mg, 10 mol%), and DCM (1.0 mL). The tubes were evacuated and backfilled with argon (three times). Then the mixtures were stirred and irradiated by a 40 W blue LED at room temperature. After two hours, the blue LED was turned off and one Schlenk tube was removed from the irradiator for treatment. The remaining seven Schlenk tubes were stirred for two hours in the absence of light. Then one Schlenk tube was removed for treatment and the blue LED was turned back on to irradiate the remaining six reactions. After another two hours, the blue LED was

turned off and one Schlenk tube was removed for treatment. The remaining five reactions were stirred under no light for another two hours. Next, one Schlenk tube was removed for processing and the blue LED was turned back on to irradiate the remaining four reactions. Two hours later, the blue LED was turned off and one Schlenk tube was removed for processing, and the remaining three Schlenk tube was stirred for two hours in the absence of light. Then, Schlenk tube was removed for processing. Repeat the previous operation until the last reaction is processed. The crude product was purified by flash column chromatography on silica gel (petroleum ether/EtOAc) to afford desired products **3a**. The yield of **3a** was measured by weight of the product. The nature of the graph indicates that the azolation process is light dependent as no formation of desired product was observed in the absence of the light.

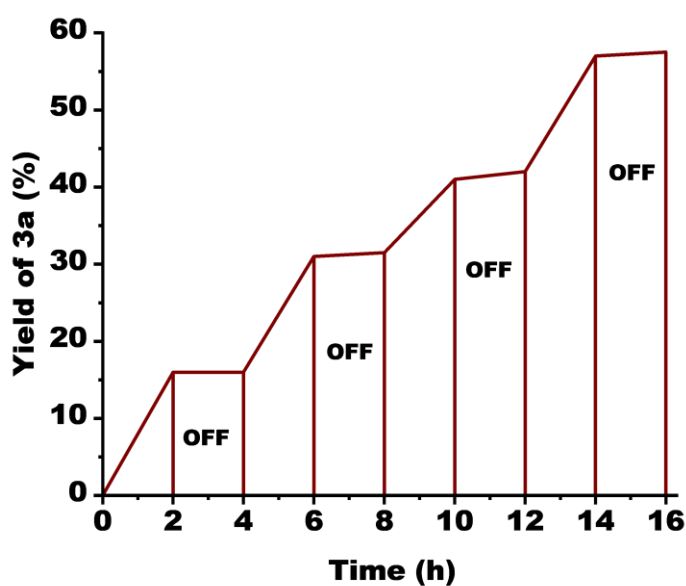

Figure S-8 Light ON-OFF experiment

### 8.3 UV-experiments

Step 1: 0.1 mmol of **1a**, TPT, and [**1a** (0.1 mmol, 1 eq)+TPT (0.34 eq)] in 1 mL of DCM.

Step 2: put 1 $\mu$ l of Step 1 solution into a cuvette containing 2 mL of DCM. Finally, the absorption spectra of these solutions were analysed (Figure S-9) using a UV-Vis spectrophotometer. (UV-3600, Shimadzu, Japan).

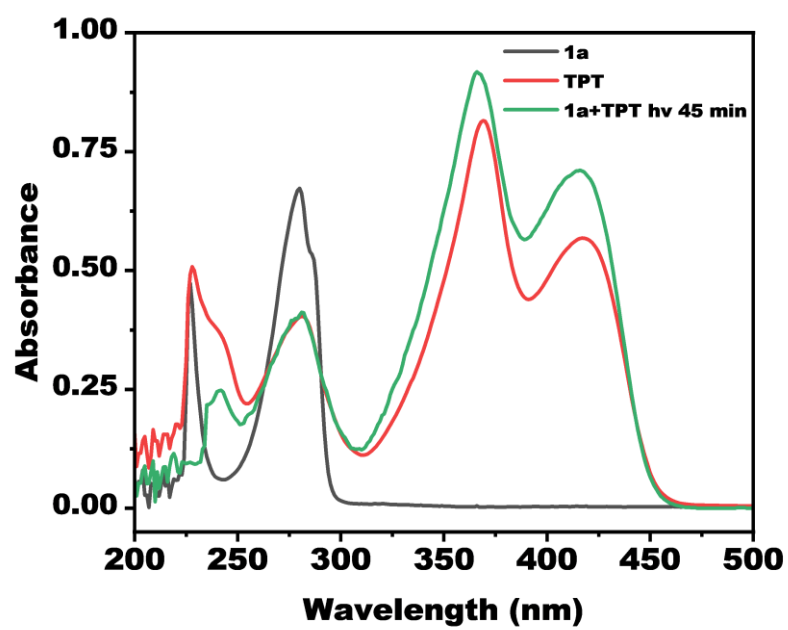

Figure S-9 UV-experiments



## 9. Characterization data of products

### Ethyl 1-(4-methoxyphenyl)-1H-pyrazole-4-carboxylate (3a)

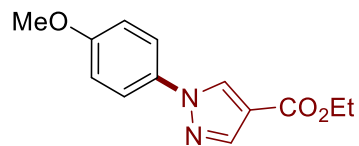

White solid, m.p. 65-68 °C. Isolated yield: 19.2 mg, 78%. **<sup>1</sup>H NMR** (400 MHz, CDCl<sub>3</sub>) δ 8.30 (s, 1H), 8.07 (s, 1H), 7.60 (d, *J* = 9.0 Hz, 2H), 6.98 (d, *J* = 9.0 Hz, 2H), 4.33 (q, *J* = 7.1 Hz, 2H), 3.85 (s, 3H), 1.37 (t, *J* = 7.1 Hz, 3H). **<sup>13</sup>C NMR** (100 MHz, CDCl<sub>3</sub>) δ 163.1, 159.1, 142.0, 133.2, 130.1, 121.4, 116.7, 114.8, 60.5, 55.7, 14.5. **HRMS** Calcd for C<sub>13</sub>H<sub>15</sub>N<sub>2</sub>O<sub>3</sub> [M+H]<sup>+</sup>: 247.1077; Found: 247.1085.

### Ethyl 1-(4-methoxy-3-methylphenyl)-1H-pyrazole-4-carboxylate (3b)

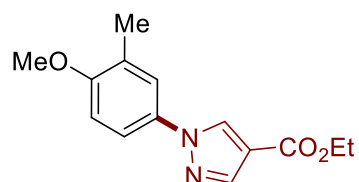

White solid, m.p. 78-81 °C. Isolated yield: 13.5 mg, 52%. **<sup>1</sup>H NMR** (400 MHz, CDCl<sub>3</sub>) δ 8.29 (s, 1H), 8.06 (s, 1H), 7.47 (d, *J* = 2.4 Hz, 1H), 7.44 (dd, *J* = 8.7, 2.7 Hz, 1H), 6.87 (d, *J* = 8.6 Hz, 1H), 4.33 (q, *J* = 7.1 Hz, 2H), 3.86 (s, 3H), 2.27 (s, 3H), 1.37 (t, *J* = 7.1 Hz, 3H). **<sup>13</sup>C NMR** (100 MHz, CDCl<sub>3</sub>) δ 163.1, 157.3, 141.9, 132.7, 130.1, 128.2, 122.6, 118.4, 116.5, 110.4, 60.5, 55.8, 16.5, 14.5. **HRMS** Calcd for C<sub>14</sub>H<sub>17</sub>N<sub>2</sub>O<sub>3</sub> [M+H]<sup>+</sup>: 261.1234; Found: 261.1229.

### Ethyl 1-(3-chloro-4-methoxyphenyl)-1H-pyrazole-4-carboxylate (3c)

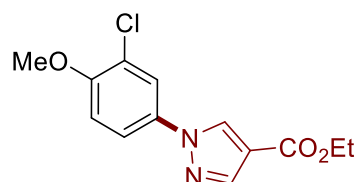

White solid, m.p. 67-71 °C. Isolated yield: 15.4 mg, 55%. **<sup>1</sup>H NMR** (400 MHz, CDCl<sub>3</sub>) δ 8.30 (s, 1H), 8.07 (s, 1H), 7.76 (d, *J* = 2.7 Hz, 1H), 7.55 (dd, *J* = 8.9, 2.7 Hz, 1H), 7.00 (d, *J* = 8.9 Hz, 1H), 4.33 (q, *J* = 7.1 Hz, 2H), 3.95 (s, 3H), 1.37 (t, *J* = 7.1 Hz, 3H). **<sup>13</sup>C NMR** (100 MHz, CDCl<sub>3</sub>) δ 162.9, 154.6, 142.3, 133.3, 130.1, 123.6, 122.2, 119.1,

117.1, 112.5, 60.6, 56.6, 14.5. **HRMS** Calcd for  $C_{13}H_{14}ClN_2O_3$   $[M+H]^+$ : 281.0687; Found: 281.0677.

**Ethyl 1-(3-bromo-4-methoxyphenyl)-1H-pyrazole-4-carboxylate (3d)**

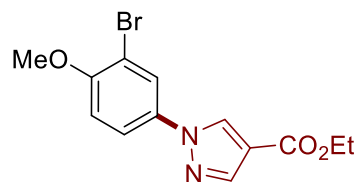

White solid, m.p. 97-99 °C. Isolated yield: 23.3 mg, 72%.  **$^1H$  NMR** (400 MHz,  $CDCl_3$ )  $\delta$  8.30 (s, 1H), 8.06 (s, 1H), 7.92 (d,  $J = 2.7$  Hz, 1H), 7.59 (dd,  $J = 8.8, 2.7$  Hz, 1H), 6.96 (d,  $J = 8.9$  Hz, 1H), 4.33 (q,  $J = 7.1$  Hz, 2H), 3.93 (s, 3H), 1.37 (t,  $J = 7.1$  Hz, 3H).  **$^{13}C$  NMR** (100 MHz,  $CDCl_3$ )  $\delta$  162.8, 155.5, 142.3, 133.6, 130.0, 125.2, 119.9, 117.1, 112.4, 112.2, 60.6, 56.7, 14.5. **HRMS** Calcd for  $C_{13}H_{14}BrN_2O_3$   $[M+H]^+$ : 325.0182; Found: 325.0187.

**Ethyl 1-(3-acetyl-4-methoxyphenyl)-1H-pyrazole-4-carboxylate (3e)**

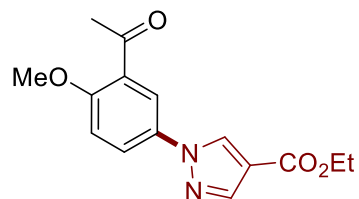

White solid, m.p. 91-93 °C. Isolated yield: 21.9 mg, 76%.  **$^1H$  NMR** (400 MHz,  $CDCl_3$ )  $\delta$  8.37 (s, 1H), 8.07 (s, 1H), 8.00 (d,  $J = 2.9$  Hz, 1H), 7.88 (dd,  $J = 8.9, 2.9$  Hz, 1H), 7.08 (d,  $J = 9.0$  Hz, 1H), 4.33 (q,  $J = 7.1$  Hz, 2H), 3.97 (s, 3H), 2.65 (s, 3H), 1.37 (t,  $J = 7.1$  Hz, 3H).  **$^{13}C$  NMR** (100 MHz,  $CDCl_3$ )  $\delta$  198.5, 162.9, 158.2, 142.3, 133.1, 130.1, 128.6, 125.3, 121.4, 117.0, 113.0, 60.6, 56.2, 32.0, 14.5. **HRMS** Calcd for  $C_{15}H_{17}N_2O_4$   $[M+H]^+$ : 289.1183; Found: 289.1189.

**Ethyl 1-(4-methoxy-2-methylphenyl)-1H-pyrazole-4-carboxylate (3f)**

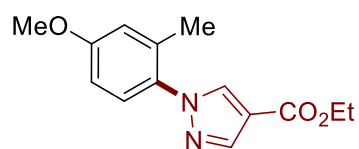

Yellow oil. Isolated yield: 21.1 mg, 81%.  **$^1H$  NMR** (400 MHz,  $CDCl_3$ )  $\delta$  8.08 (s, 1H), 8.02 (s, 1H), 7.21 (d,  $J = 8.6$  Hz, 1H), 6.82 (d,  $J = 2.9$  Hz, 1H), 6.78 (dd,  $J = 8.6, 2.9$  Hz, 1H), 4.32 (q,  $J = 7.1$  Hz, 2H), 3.82 (s, 3H), 2.17 (s, 3H), 1.36 (t,  $J = 7.1$  Hz, 3H).

$^{13}\text{C}$  NMR (100 MHz,  $\text{CDCl}_3$ )  $\delta$  163.2, 160.0, 141.6, 135.6, 134.3, 132.5, 127.4, 116.4, 115.8, 111.8, 60.4, 55.6, 18.1, 14.5. **HRMS** Calcd for  $\text{C}_{14}\text{H}_{17}\text{N}_2\text{O}_3$   $[\text{M}+\text{H}]^+$ : 261.1234; Found: 261.1241.

**Ethyl 1-(2-chloro-4-methoxyphenyl)-1H-pyrazole-4-carboxylate (3g)**

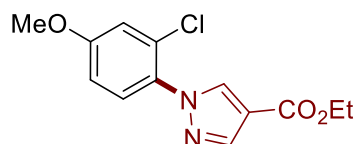

Yellow oil. Isolated yield: 23.5 mg, 84%.  $^1\text{H}$  NMR (400 MHz,  $\text{CDCl}_3$ )  $\delta$  8.21 (s, 1H), 8.08 (s, 1H), 7.43 (d,  $J$  = 8.8 Hz, 1H), 7.03 (d,  $J$  = 2.8 Hz, 1H), 6.89 (dd,  $J$  = 8.8, 2.8 Hz, 1H), 4.32 (q,  $J$  = 7.1 Hz, 2H), 3.84 (s, 3H), 1.36 (t,  $J$  = 7.2 Hz, 3H).  $^{13}\text{C}$  NMR (100 MHz,  $\text{CDCl}_3$ )  $\delta$  163.0, 160.3, 141.9, 134.9, 130.8, 130.0, 128.7, 116.2, 115.6, 113.6, 60.5, 56.0, 14.5. **HRMS** Calcd for  $\text{C}_{13}\text{H}_{14}\text{ClN}_2\text{O}_3$   $[\text{M}+\text{H}]^+$ : 281.0687; Found: 281.0696.

**Ethyl 1-(2-bromo-4-methoxyphenyl)-1H-pyrazole-4-carboxylate (3h)**

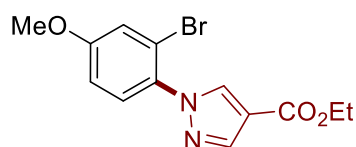

Yellow oil. Isolated yield: 26.9 mg, 83%.  $^1\text{H}$  NMR (400 MHz,  $\text{CDCl}_3$ )  $\delta$  8.17 (s, 1H), 8.09 (s, 1H), 7.38 (d,  $J$  = 8.8 Hz, 1H), 7.21 (d,  $J$  = 2.8 Hz, 1H), 6.93 (dd,  $J$  = 8.8, 2.8 Hz, 1H), 4.32 (q,  $J$  = 7.1 Hz, 2H), 3.85 (s, 3H), 1.36 (t,  $J$  = 7.1 Hz, 3H).  $^{13}\text{C}$  NMR (100 MHz,  $\text{CDCl}_3$ )  $\delta$  163.0, 160.5, 141.9, 135.1, 132.4, 129.0, 119.9, 118.6, 116.1, 114.1, 60.5, 56.0, 14.5. **HRMS** Calcd for  $\text{C}_{13}\text{H}_{14}\text{BrN}_2\text{O}_3$   $[\text{M}+\text{H}]^+$ : 325.0182; Found: 325.0177.

**Ethyl 1-(2-fluoro-4-methoxyphenyl)-1H-pyrazole-4-carboxylate (3i)**

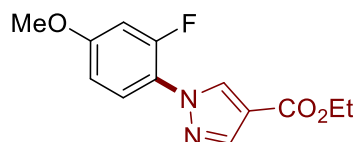

White solid, m.p. 68-70 °C. Isolated yield: 23.0 mg, 87%.  $^1\text{H}$  NMR (400 MHz,  $\text{CDCl}_3$ )  $\delta$  8.33 (d,  $J$  = 2.3 Hz, 1H), 8.08 (s, 1H), 7.71 (t,  $J$  = 9.1 Hz, 1H), 6.83 – 6.73 (m, 2H), 4.33 (q,  $J$  = 7.1 Hz, 2H), 3.84 (s, 3H), 1.36 (t,  $J$  = 7.1 Hz, 3H).  $^{19}\text{F}$  NMR (376 MHz,  $\text{CDCl}_3$ )  $\delta$  -122.49.  $^{13}\text{C}$  NMR (100 MHz,  $\text{CDCl}_3$ )  $\delta$  162.9, 160.1 (d,  $J$  = 10.2 Hz), 154.7 (d,  $J$  = 249.5 Hz), 141.8, 133.9 (d,  $J$  = 8.1 Hz), 125.7 (d,  $J$  = 2.0 Hz), 121.2 (d,  $J$  = 10.8

Hz), 116.7, 110.7 (d,  $J = 3.0$  Hz), 102.7 (d,  $J = 23.9$  Hz), 60.5, 56.0, 14.5. **HRMS** Calcd for  $C_{13}H_{14}FN_2O_3$   $[M+H]^+$ : 265.0983; Found: 265.0987.

### Ethyl 1-(2,6-difluoro-4-methoxyphenyl)-1H-pyrazole-4-carboxylate (3j)

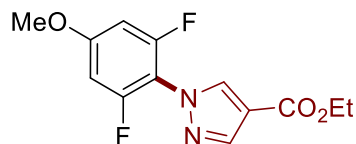

Colourless oil. Isolated yield: 25.2 mg, 89%.  **$^1H$  NMR** (400 MHz,  $CDCl_3$ )  $\delta$  8.14 (s, 1H), 8.09 (s, 1H), 6.61 (s, 1H), 6.59 (s, 1H), 4.32 (q,  $J = 7.1$  Hz, 2H), 3.83 (s, 3H), 1.35 (t,  $J = 7.1$  Hz, 3H).  **$^{19}F$  NMR** (376 MHz,  $CDCl_3$ )  $\delta$  -118.97.  **$^{13}C$  NMR** (100 MHz,  $CDCl_3$ )  $\delta$  162.7, 161.2 (t,  $J = 13.2$  Hz), 158.2 (dd,  $J = 252.8, 6.0$  Hz), 142.5, 136.1, 129.4 (d,  $J = 168.3$  Hz), 116.5, 98.7 (dd,  $J = 24.1, 2.8$  Hz), 60.6, 56.3, 14.5. **HRMS** Calcd for  $C_{13}H_{13}F_2N_2O_3$   $[M+H]^+$ : 283.0889; Found: 283.0884.

### Ethyl 1-(2-cyano-4-methoxyphenyl)-1H-pyrazole-4-carboxylate (3k)

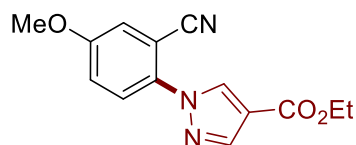

White solid, m.p. 102-105 °C. Isolated yield: 23.1 mg, 85%.  **$^1H$  NMR** (400 MHz,  $CDCl_3$ )  $\delta$  8.40 (s, 1H), 8.15 (s, 1H), 7.61 (d,  $J = 9.2$  Hz, 1H), 7.26 – 7.21 (m, 2H), 4.34 (q,  $J = 7.1$  Hz, 2H), 3.89 (s, 3H), 1.37 (t,  $J = 7.1$  Hz, 3H).  **$^{13}C$  NMR** (100 MHz,  $CDCl_3$ )  $\delta$  162.6, 159.2, 142.9, 134.8, 133.1, 126.7, 120.4, 118.4, 117.6, 116.0, 107.9, 60.7, 56.2, 14.5. **HRMS** Calcd for  $C_{14}H_{14}N_3O_3$   $[M+H]^+$ : 272.1030; Found: 272.1038.

### Ethyl 1-(2-formyl-4-methoxyphenyl)-1H-pyrazole-4-carboxylate (3l)

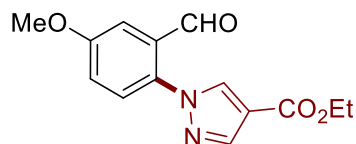

White solid, m.p. 137-139 °C. Isolated yield: 19.8 mg, 72%.  **$^1H$  NMR** (400 MHz,  $CDCl_3$ )  $\delta$  9.90 (s, 1H), 8.23 (s, 1H), 8.13 (s, 1H), 7.50 (dd,  $J = 3.0, 0.8$  Hz, 1H), 7.41 (d,  $J = 8.7$  Hz, 1H), 7.21 (dd,  $J = 8.7, 3.0$  Hz, 1H), 4.34 (q,  $J = 7.1$  Hz, 2H), 3.91 (s, 3H), 1.37 (t,  $J = 7.1$  Hz, 3H).  **$^{13}C$  NMR** (100 MHz,  $CDCl_3$ )  $\delta$  189.1, 162.7, 160.1, 142.7,

135.1, 134.4, 131.8, 126.9, 121.5, 117.3, 111.7, 60.7, 56.1, 14.5. **HRMS** Calcd for  $C_{14}H_{15}N_2O_4$   $[M+H]^+$ : 275.1026; Found: 275.1038.

**Ethyl 1-(4-methoxy-2-(trifluoromethyl)phenyl)-1H-pyrazole-4-carboxylate (3m)**

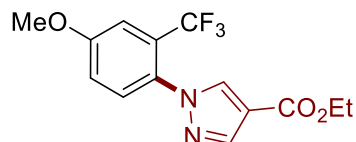

Yellow oil. Isolated yield: 24.8 mg, 79%.  **$^1H$  NMR** (400 MHz,  $CDCl_3$ )  $\delta$  8.08 (s, 2H), 7.41 (d,  $J = 8.7$  Hz, 1H), 7.27 (d,  $J = 2.9$  Hz, 1H), 7.13 (dd,  $J = 8.7, 2.9$  Hz, 1H), 4.32 (q,  $J = 7.1$  Hz, 2H), 3.90 (s, 3H), 1.36 (t,  $J = 7.2$  Hz, 3H).  **$^{19}F$  NMR** (376 MHz,  $CDCl_3$ )  $\delta$  -59.73.  **$^{13}C$  NMR** (100 MHz,  $CDCl_3$ )  $\delta$  162.9, 160.2, 142.0, 135.4 (d,  $J = 1.8$  Hz), 130.7, 127.7 (d,  $J = 31.7$  Hz), 129.6 – 124.9 (m), 122.6 (d,  $J = 273.8$  Hz), 117.5, 116.4, 112.9 (q,  $J = 5.1$  Hz), 60.6, 56.1, 14.5. **HRMS** Calcd for  $C_{14}H_{14}F_3N_2O_3$   $[M+H]^+$ : 315.0951; Found: 315.0958.

**Ethyl 1-(2-methoxyphenyl)-1H-pyrazole-4-carboxylate (3n)<sup>[2]</sup>**

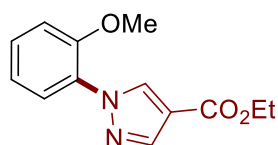

Colorless liquid. Isolated yield: 17.7 mg, 72 %.  **$^1H$  NMR** (400 MHz,  $CDCl_3$ )  $\delta$  8.51 (s, 1H), 8.06 (s, 1H), 7.72 (dd,  $J = 8.2, 1.6$  Hz, 1H), 7.36 – 7.28 (m, 1H), 7.09 – 7.02 (m, 2H), 4.32 (q,  $J = 7.1$  Hz, 2H), 3.88 (s, 3H), 1.36 (t,  $J = 7.1$  Hz, 3H).  **$^{13}C$  NMR** (100 MHz,  $CDCl_3$ )  $\delta$  163.2, 151.3, 141.4, 135.1, 129.0, 125.3, 121.2, 115.8, 112.3, 60.3, 56.0, 14.5.

**Ethyl 1-(2-methoxyphenyl)-1H-pyrazole-4-carboxylate (3o)**

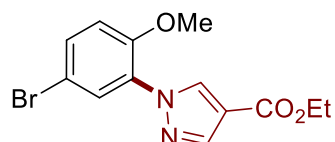

Yellow solid, m.p. 95-97 °C. Isolated yield: 21.5 mg, 66%.  **$^1H$  NMR** (400 MHz,  $CDCl_3$ )  $\delta$  8.51 (s, 1H), 8.06 (s, 1H), 7.64 (dd,  $J = 8.1, 0.7$  Hz, 1H), 7.23 – 7.18 (m, 2H), 4.33 (q,  $J = 7.1$  Hz, 2H), 3.92 (s, 3H), 1.37 (t,  $J = 7.1$  Hz, 3H).  **$^{13}C$  NMR** (100 MHz,  $CDCl_3$ )  $\delta$  163.1, 151.6, 141.5, 134.9, 128.0, 126.2, 124.4, 121.9, 116.2, 115.9, 60.4, 56.4, 14.5. **HRMS** Calcd for  $C_{13}H_{14}BrN_2O_3$   $[M+H]^+$ : 325.0182; Found: 325.0186.

### Ethyl 1-(4-acetoxyphenyl)-1H-pyrazole-4-carboxylate (3q)

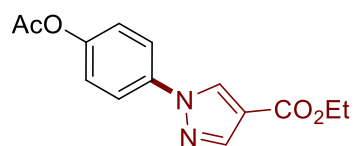

White solid, m.p. 94-96 °C. Isolated yield: 20.8 mg, 76 %.  $^1\text{H NMR}$  (400 MHz,  $\text{CDCl}_3$ )  $\delta$  8.36 (s, 1H), 8.08 (s, 1H), 7.70 (d,  $J = 9.0$  Hz, 2H), 7.20 (d,  $J = 9.0$  Hz, 2H), 4.33 (q,  $J = 7.1$  Hz, 2H), 2.31 (s, 3H), 1.36 (t,  $J = 7.1$  Hz, 3H).  $^{13}\text{C NMR}$  (100 MHz,  $\text{CDCl}_3$ )  $\delta$  169.3, 162.8, 149.8, 142.4, 137.1, 130.1, 122.9, 120.7, 117.2, 60.6, 21.2, 14.5. **HRMS** Calcd for  $\text{C}_{14}\text{H}_{15}\text{N}_2\text{O}_4$   $[\text{M}+\text{H}]^+$ : 275.1026; Found: 275.1036.

### Ethyl 1-(4-ethoxyphenyl)-1H-pyrazole-4-carboxylate (3r)

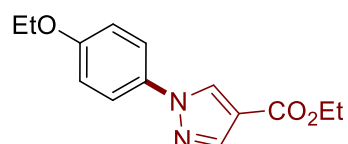

White solid, m.p. 62-63 °C. Isolated yield: 17.0 mg, 64%.  $^1\text{H NMR}$  (400 MHz,  $\text{CDCl}_3$ )  $\delta$  8.30 (s, 1H), 8.06 (s, 1H), 7.58 (d,  $J = 9.0$  Hz, 2H), 6.97 (d,  $J = 9.0$  Hz, 2H), 4.33 (q,  $J = 7.1$  Hz, 2H), 4.07 (q,  $J = 7.0$  Hz, 2H), 1.44 (t,  $J = 7.0$  Hz, 3H), 1.37 (t,  $J = 7.1$  Hz, 3H).  $^{13}\text{C NMR}$  (100 MHz,  $\text{CDCl}_3$ )  $\delta$  177.9, 163.1, 158.5, 142.0, 130.1, 121.4, 116.7, 115.3, 64.0, 60.5, 14.9, 14.6. **HRMS** Calcd for  $\text{C}_{14}\text{H}_{17}\text{N}_2\text{O}_3$   $[\text{M}+\text{H}]^+$ : 261.1234; Found: 261.1245.

### Ethyl 1-(4-((triisopropylsilyl)oxy)phenyl)-1H-pyrazole-4-carboxylate (3s)

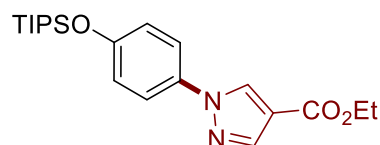

Colourless oil. Isolated yield: 15.1 mg, 39%.  $^1\text{H NMR}$  (400 MHz,  $\text{CDCl}_3$ )  $\delta$  8.30 (s, 1H), 8.06 (s, 1H), 7.53 (d,  $J = 8.9$  Hz, 2H), 6.96 (d,  $J = 8.9$  Hz, 2H), 4.33 (q,  $J = 7.1$  Hz, 2H), 1.37 (t,  $J = 7.1$  Hz, 3H), 1.33 – 1.22 (m, 3H), 1.11 (d,  $J = 7.3$  Hz, 18H).  $^{13}\text{C NMR}$  (100 MHz,  $\text{CDCl}_3$ )  $\delta$  163.1, 155.9, 142.0, 133.4, 130.1, 121.3, 120.8, 116.7, 60.5, 18.0, 14.6, 12.8. **HRMS** Calcd for  $\text{C}_{21}\text{H}_{33}\text{N}_2\text{O}_3\text{Si}$   $[\text{M}+\text{H}]^+$ : 389.2255; Found: 389.2268.

### Ethyl 1-(4-phenoxyphenyl)-1H-pyrazole-4-carboxylate (3t)<sup>[3]</sup>

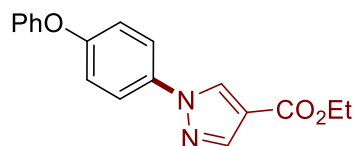

White solid, m.p. 108-110 °C. Isolated yield: 19.1 mg, 62%.  $^1\text{H NMR}$  (400 MHz,  $\text{CDCl}_3$ )  $\delta$  8.34 (d,  $J = 0.7$  Hz, 1H), 8.08 (s, 1H), 7.70 – 7.59 (m, 2H), 7.40 – 7.32 (m, 2H), 7.17 – 7.11 (m, 1H), 7.11 – 7.06 (m, 2H), 7.06 – 7.01 (m, 2H), 4.33 (q,  $J = 7.1$  Hz, 2H), 1.37 (t,  $J = 7.1$  Hz, 3H).  $^{13}\text{C NMR}$  (100 MHz,  $\text{CDCl}_3$ )  $\delta$  162.9, 156.9, 156.8, 142.2, 135.0, 130.1, 130.0, 123.9, 121.4, 119.5, 119.2, 116.9, 60.5, 14.5.

#### Ethyl 1-(p-tolyl)-1H-pyrazole-4-carboxylate (3u)<sup>[4]</sup>

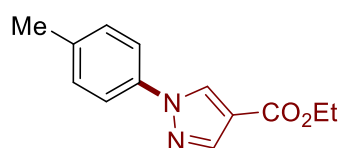

Brown solid. Mp: 68-70 °C. Isolated yield: 15.6 mg, 68 %.  $^1\text{H NMR}$  (400 MHz,  $\text{CDCl}_3$ )  $\delta$  8.28 (s, 1H), 8.00 (s, 2H), 7.49 (d,  $J = 8.5$  Hz, 2H), 7.18 (d,  $J = 7.5$  Hz, 2H), 4.25 (q,  $J = 7.1$  Hz, 2H), 2.30 (s, 3H), 1.29 (t,  $J = 7.1$  Hz, 3H).  $^{13}\text{C NMR}$  (100 MHz,  $\text{CDCl}_3$ )  $\delta$  163.0, 142.1, 137.6, 137.3, 130.2, 130.0, 119.6, 116.8, 60.5, 21.1, 14.5.

#### Ethyl 1-(o-tolyl)-1H-pyrazole-4-carboxylate (3v)<sup>[5]</sup>

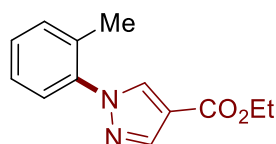

Yellow oil. Isolated yield: 10.0 mg, 42%.  $^1\text{H NMR}$  (400 MHz,  $\text{CDCl}_3$ )  $\delta$  8.09 (dd,  $J = 7.9, 0.6$  Hz, 2H), 7.40 – 7.26 (m, 4H), 4.33 (q,  $J = 7.1$  Hz, 2H), 2.24 (s, 3H), 1.37 (t,  $J = 7.1$  Hz, 3H).  $^{13}\text{C NMR}$  (100 MHz,  $\text{CDCl}_3$ ) (101 MHz, Chloroform-*d*)  $\delta$  163.2, 141.7, 139.3, 134.0, 133.8, 131.6, 129.3, 126.9, 126.1, 116.0, 60.5, 18.1, 14.5.

#### Ethyl 1-(2,6-dimethylphenyl)-1H-pyrazole-4-carboxylate (3w)

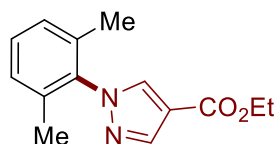

Yellow oil. Isolated yield: 15.6 mg, 64%.  $^1\text{H NMR}$  (400 MHz,  $\text{CDCl}_3$ )  $\delta$  8.10 (s, 1H), 8.05 (s, 1H), 7.29 – 7.24 (m, 1H), 7.23 – 7.12 (m, 2H), 4.34 (q,  $J = 7.1$  Hz, 2H), 2.35 (s, 3H), 2.06 (s, 3H), 1.37 (t,  $J = 7.1$  Hz, 3H).  $^{13}\text{C NMR}$  (100 MHz,  $\text{CDCl}_3$ )  $\delta$  163.2,

141.6, 139.4, 138.8, 134.3, 133.0, 130.8, 126.1, 124.1, 115.9, 60.4, 20.4, 14.5, 14.4.

**HRMS** Calcd for  $C_{14}H_{17}N_2O_2$   $[M+H]^+$ : 245.1285; Found: 245.1289.

**Ethyl 1-(naphthalen-1-yl)-1H-pyrazole-4-carboxylate (3x)**<sup>[3]</sup>

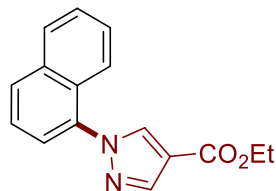

White solid, m.p. 104-106 °C. Isolated yield: 10.6 mg, 44%. **<sup>1</sup>H NMR** (400 MHz,  $CDCl_3$ )  $\delta$  8.28 (s, 1H), 8.23 (s, 1H), 8.00 – 7.90 (m, 2H), 7.80 – 7.72 (m, 1H), 7.58 – 7.51 (m, 4H), 4.36 (q,  $J = 7.1$  Hz, 2H), 1.39 (t,  $J = 7.1$  Hz, 3H). **<sup>13</sup>C NMR** (100 MHz,  $CDCl_3$ )  $\delta$  163.1, 142.2, 136.5, 135.1, 134.4, 129.9, 128.9, 128.4, 127.7, 127.0, 125.1, 123.5, 122.9, 116.3, 60.6, 14.5.

**Ethyl 1-(4-(4-fluorophenoxy)phenyl)-1H-pyrazole-4-carboxylate (3y)**

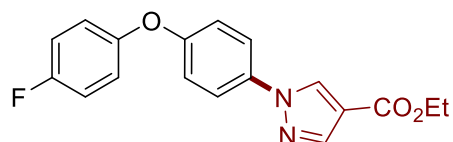

White solid, 77-79 °C. Isolated yield: 26.7 mg, 82 %. **<sup>1</sup>H NMR** (400 MHz,  $CDCl_3$ )  $\delta$  8.33 (s, 1H), 8.08 (s, 1H), 7.64 (d,  $J = 9.0$  Hz, 2H), 7.12 – 6.98 (m, 6H), 4.33 (q,  $J = 7.1$  Hz, 2H), 1.37 (t,  $J = 7.1$  Hz, 3H). **<sup>19</sup>F NMR** (376 MHz,  $CDCl_3$ )  $\delta$  -119.11. **<sup>13</sup>C NMR** (100 MHz,  $CDCl_3$ )  $\delta$  162.9, 159.3 (d,  $J = 242.7$  Hz), 157.3, 152.5 (d,  $J = 2.8$  Hz), 142.2, 135.0, 130.1, 121.5, 120.9 (d,  $J = 8.1$  Hz), 119.0, 117.4 – 116.1 (m), 60.6, 14.5. **HRMS** Calcd for  $C_{18}H_{16}FN_2O_3$   $[M+H]^+$ : 327.1139; Found: 327.1147.

**Ethyl 1-(4-(4-formylphenoxy)phenyl)-1H-pyrazole-4-carboxylate (3z)**

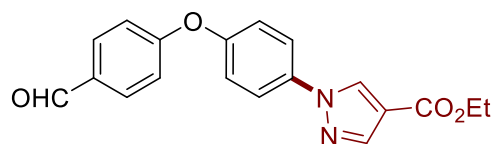

White solid, 85-87 °C. Isolated yield: 25.2 mg, 75 %. **<sup>1</sup>H NMR** (400 MHz,  $CDCl_3$ )  $\delta$  9.93 (s, 1H), 8.38 (d,  $J = 0.6$  Hz, 1H), 8.09 (s, 1H), 7.90 – 7.84 (m, 2H), 7.78 – 7.70 (m, 2H), 7.23 – 7.15 (m, 2H), 7.14 – 7.07 (m, 2H), 4.33 (q,  $J = 7.1$  Hz, 2H), 1.37 (t,  $J = 7.1$  Hz, 3H). **<sup>13</sup>C NMR** (100 MHz,  $CDCl_3$ )  $\delta$  190.8, 162.9, 162.7, 154.6, 142.4, 136.3, 132.2,



131.9, 130.2, 121.61, 121.4, 118.0, 117.2, 60.6, 14.5. **HRMS** Calcd for C<sub>19</sub>H<sub>17</sub>N<sub>2</sub>O<sub>4</sub> [M+H]<sup>+</sup>: 337.1183; Found: 337.1187.

#### 1-(4-methoxyphenyl)-4-methyl-1H-pyrazole (4a)

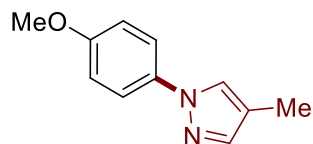

White solid, m.p. 52-54 °C. Isolated yield: 9.6 mg, 51 %. **<sup>1</sup>H NMR** (400 MHz, CDCl<sub>3</sub>) δ 7.60 (s, 1H), 7.54 (d, *J* = 9.0 Hz, 2H), 7.49 (s, 1H), 6.95 (d, *J* = 9.0 Hz, 2H), 3.83 (s, 3H), 2.15 (s, 3H). **<sup>13</sup>C NMR** (100 MHz, CDCl<sub>3</sub>) δ 158.1, 141.4, 134.3, 125.6, 120.6, 117.9, 114.6, 55.7, 9.1. **HRMS** Calcd for C<sub>11</sub>H<sub>13</sub>N<sub>2</sub>O [M+H]<sup>+</sup>: 189.1022; Found: 189.1018.

#### Methyl 1-(4-methoxyphenyl)-1H-pyrazole-4-carboxylate (4b)

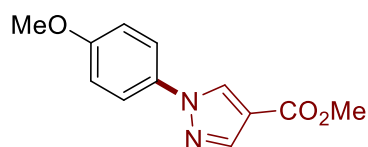

White solid, 115-116 °C. Isolated yield: 12.8 mg, 55 %. **<sup>1</sup>H NMR** (400 MHz, CDCl<sub>3</sub>) δ 8.31 (s, 1H), 8.07 (s, 1H), 7.60 (d, *J* = 9.0 Hz, 2H), 6.99 (d, *J* = 9.0 Hz, 2H), 3.87 (s, 3H), 3.85 (s, 3H). **<sup>13</sup>C NMR** (100 MHz, CDCl<sub>3</sub>) δ 163.5, 159.2, 142.0, 133.2, 130.2, 121.4, 116.3, 114.8, 55.8, 51.7. **HRMS** Calcd for C<sub>12</sub>H<sub>13</sub>N<sub>2</sub>O<sub>3</sub> [M+H]<sup>+</sup>: 233.0921; Found: 233.0931.

#### 1-(4-methoxyphenyl)-1H-pyrazole-4-carbonitrile (4c)

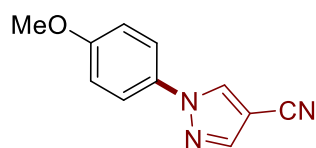

White solid, 76-78 °C. Isolated yield: 12.5 mg, 63 %. **<sup>1</sup>H NMR** (400 MHz, CDCl<sub>3</sub>) δ 8.20 (d, *J* = 0.6 Hz, 1H), 7.95 (s, 1H), 7.56 (d, *J* = 9.0 Hz, 2H), 6.99 (d, *J* = 9.1 Hz, 2H), 3.85 (s, 3H). **<sup>13</sup>C NMR** (100 MHz, CDCl<sub>3</sub>) δ 159.6, 143.1, 132.5, 131.8, 121.7, 114.9, 113.3, 94.0, 55.8. **HRMS** Calcd for C<sub>11</sub>H<sub>10</sub>N<sub>3</sub>O [M+H]<sup>+</sup>: 200.0818; Found: 200.0826.

#### 1-(4-methoxyphenyl)-4-nitro-1H-pyrazole (4d)

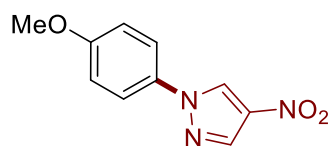

White solid, m.p. 124-126 °C. Isolated yield: 11.6 mg, 53 %.  $^1\text{H NMR}$  (400 MHz,  $\text{CDCl}_3$ )  $\delta$  8.52 (d,  $J = 0.6$  Hz, 1H), 8.23 (s, 1H), 7.60 (d,  $J = 9.1$  Hz, 2H), 7.01 (d,  $J = 9.0$  Hz, 2H), 3.87 (s, 3H).  $^{13}\text{C NMR}$  (100 MHz,  $\text{CDCl}_3$ )  $\delta$  159.9, 141.4, 136.6, 132.3, 125.9, 121.6, 115.0, 55.8. **HRMS** Calcd for  $\text{C}_{11}\text{H}_{10}\text{N}_3\text{O}$   $[\text{M}+\text{H}]^+$ : 200.0818; Found: 200.0826.

#### 4-chloro-1-(4-methoxyphenyl)-1H-pyrazole (4e)

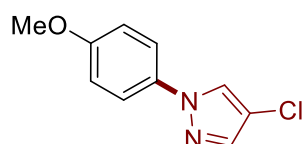

White solid, m.p. 75-78 °C. Isolated yield: 7.3 mg, 35 %.  $^1\text{H NMR}$  (400 MHz,  $\text{CDCl}_3$ )  $\delta$  7.81 (s, 1H), 7.61 (s, 1H), 7.53 (d,  $J = 9.0$  Hz, 2H), 6.97 (d,  $J = 9.0$  Hz, 2H), 3.85 (s, 3H).  $^{13}\text{C NMR}$  (100 MHz,  $\text{CDCl}_3$ )  $\delta$  167.0, 158.8, 157.1, 139.1, 125.1, 120.9, 114.8, 55.7. **HRMS** Calcd for  $\text{C}_{10}\text{H}_{10}\text{ClN}_2\text{O}$   $[\text{M}+\text{H}]^+$ : 209.0476; Found: 209.0481.

#### 4-bromo-1-(4-methoxyphenyl)-1H-pyrazole (4f)

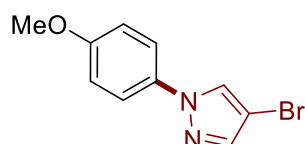

White solid, m.p. 81-83 °C. Isolated yield: 9.3 mg, 37 %.  $^1\text{H NMR}$  (400 MHz,  $\text{CDCl}_3$ )  $\delta$  7.83 (s, 1H), 7.64 (s, 1H), 7.53 (d,  $J = 9.0$  Hz, 2H), 6.97 (d,  $J = 9.0$  Hz, 2H), 3.85 (s, 3H).  $^{13}\text{C NMR}$  (100 MHz,  $\text{CDCl}_3$ )  $\delta$  158.8, 141.2, 133.6, 127.3, 121.0, 114.8, 95.2, 55.7. **HRMS** Calcd for  $\text{C}_{10}\text{H}_{10}\text{BrN}_2\text{O}$   $[\text{M}+\text{H}]^+$ : 252.9971; Found: 252.9978.

#### 4-iodo-1-(4-methoxyphenyl)-1H-pyrazole (4g)

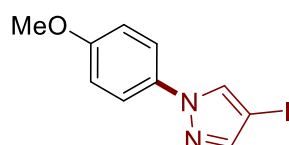

White solid, m.p. 105-107 °C. Isolated yield: 12.3 mg, 41 %. **<sup>1</sup>H NMR** (400 MHz, CDCl<sub>3</sub>) δ 7.86 (s, 1H), 7.68 (s, 1H), 7.54 (d, *J* = 9.0 Hz, 2H), 6.97 (d, *J* = 9.1 Hz, 2H), 3.85 (s, 3H). **<sup>13</sup>C NMR** (100 MHz, CDCl<sub>3</sub>) δ 185.1, 158.8, 145.7, 133.5, 131.5, 121.0, 114.7, 55.7. **HRMS** Calcd for C<sub>10</sub>H<sub>10</sub>IN<sub>2</sub>O [M+H]<sup>+</sup>: 300.9832; Found: 300.9838.

#### Ethyl 1-(4-methoxyphenyl)-1H-pyrazole-5-carboxylate (4h)

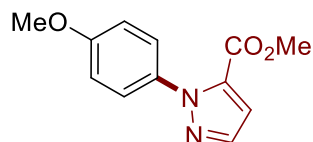

White solid, m.p. 61-63 °C. Isolated yield: 15.0 mg, 61 %. **<sup>1</sup>H NMR** (400 MHz, CDCl<sub>3</sub>) δ 7.83 (d, *J* = 2.5 Hz, 1H), 7.64 (d, *J* = 9.0 Hz, 2H), 7.00 – 6.92 (m, 3H), 4.44 (q, *J* = 7.1 Hz, 2H), 3.85 (s, 3H), 1.42 (t, *J* = 7.1 Hz, 3H). **<sup>13</sup>C NMR** (100 MHz, CDCl<sub>3</sub>) δ 162.5, 159.2, 145.0, 133.5, 128.6, 122.0, 114.7, 110.3, 61.2, 55.7, 14.5. **HRMS** Calcd for C<sub>13</sub>H<sub>15</sub>N<sub>2</sub>O<sub>3</sub> [M+H]<sup>+</sup>: 247.1077; Found: 247.1085.

#### 1-(4-methoxyphenyl)-1H-benzo[d][1,2,3]triazole (4i)

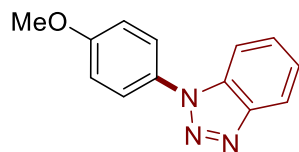

White solid, m.p. 70-73 °C. Isolated yield: 10.1 mg, 45 %. **<sup>1</sup>H NMR** (400 MHz, CDCl<sub>3</sub>) δ 8.14 (d, *J* = 8.4 Hz, 1H), 7.72 – 7.64 (m, 3H), 7.53 (t, *J* = 7.6 Hz, 1H), 7.46 – 7.40 (m, 1H), 7.12 (d, *J* = 8.9 Hz, 2H), 3.91 (s, 3H). **<sup>13</sup>C NMR** (100 MHz, CDCl<sub>3</sub>) δ 160.0, 146.5, 132.8, 130.14, 128.12, 124.8, 124.4, 120.4, 115.1, 110.4, 55.8. **HRMS** Calcd for C<sub>13</sub>H<sub>15</sub>N<sub>2</sub>O<sub>3</sub> [M+H]<sup>+</sup>: 226.0975; Found: 226.0983.

#### 1-(4-methoxyphenyl)-1H-1,2,3-triazole (4j)<sup>[6]</sup>

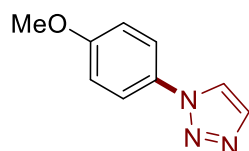

Beige solid, m.p. 80-82 °C. Isolated yield: 11.4 mg, 65 %. **<sup>1</sup>H NMR** (400 MHz, CDCl<sub>3</sub>) δ 7.90 (d, *J* = 1.1 Hz, 1H), 7.79 (d, *J* = 1.1 Hz, 1H), 7.64 – 7.56 (m, 2H), 7.05 – 6.96 (m, 2H), 3.84 (s, 3H). **<sup>13</sup>C NMR** (100 MHz, CDCl<sub>3</sub>) δ 159.9, 134.2, 130.4, 122.3, 122.1, 114.8, 55.6.

### 1-(4-methoxyphenyl)-1H-1,2,4-triazole (4k)<sup>[7]</sup>

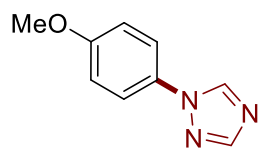

White solid. Mp: 96-97 °C. Isolated yield: 10.0 mg, 54 %. <sup>1</sup>H NMR (400 MHz, CDCl<sub>3</sub>) δ 8.43 (s, 1H), 8.05 (s, 1H), 7.54 (dd, *J* = 9.1, 1.0 Hz, 2H), 6.98 (dd, *J* = 9.0, 1.2 Hz, 2H), 3.83 (s, 3H). <sup>13</sup>C NMR (100 MHz, CDCl<sub>3</sub>) δ 159.5, 152.4, 140.9, 130.5, 121.9, 114.9, 55.7.

### 10. References

- [1] C. Wang, X.-J. Zhang, Y.-W. Zhao, Q. Liu, H. Cheng, Z. Huang, Y. Zhao, *Org. Chem. Front.* **2023**, *10*, 335–341.
- [2] Q. Zhang, L.-G. Meng, K. Wang, L. Wang, *Org. Lett.* **2015**, *17*, 872-875.
- [3] P. P. Sen, S. R. Roy, *Org. Lett.* **2023**, *25*, 1895-1900.
- [4] S. B. Annes, R. Saritha, S. Subramanian, B. Shankar, S. Ramesh, *Green Chemistry* **2020**, *22*, 2388-2393.
- [5] Q. Zhang, L.-G. Meng, K. Wang, L. Wang, *Org. Lett.* **2015**, *17*, 872-875.
- [6] V. V. Voronin, M. S. Ledovskaya, K. S. Rodygin, V. P. Ananikov, *Eur. J. Org. Chem.* **2021**, *2021*, 5640-5648.
- [7] J. C. Antilla, J. M. Baskin, T. E. Barder, S. L. Buchwald, *J. Org. Chem.* **2004**, *69*, 5578-5587.

## 11. NMR spectra

### <sup>1</sup>H NMR Spectrum of 3a (400 MHz, CDCl<sub>3</sub>)

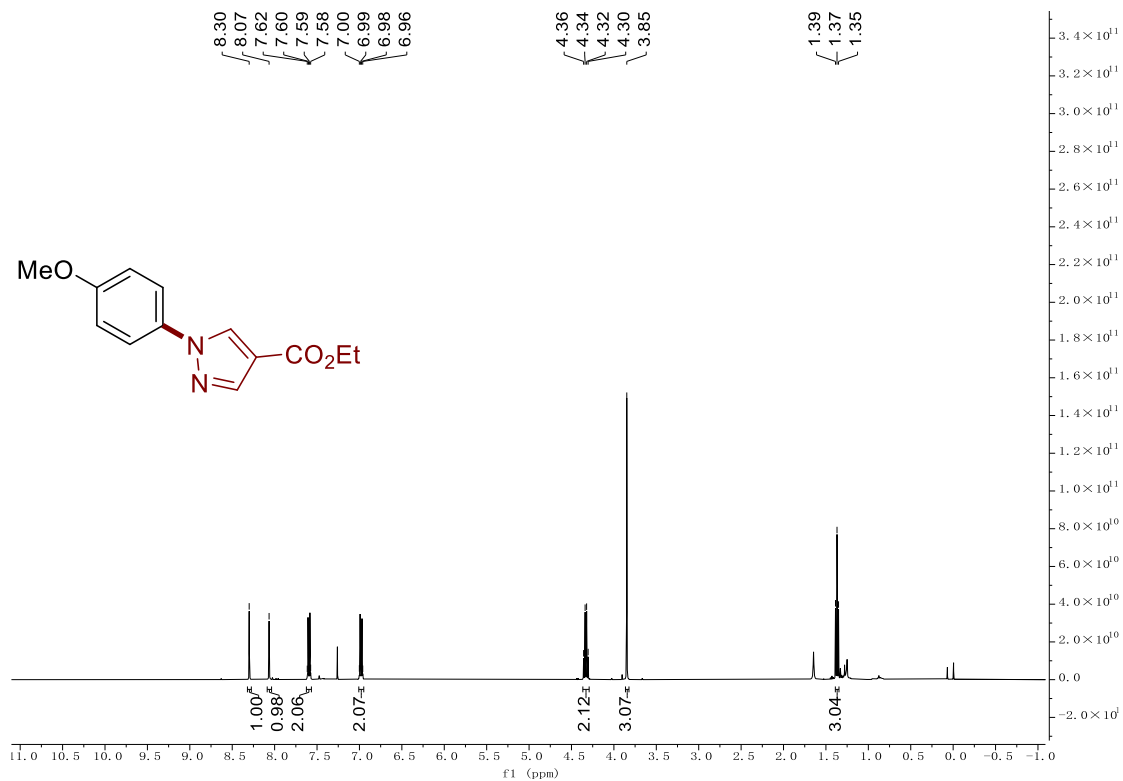

### <sup>13</sup>C NMR Spectrum of 3a (400 MHz, CDCl<sub>3</sub>)

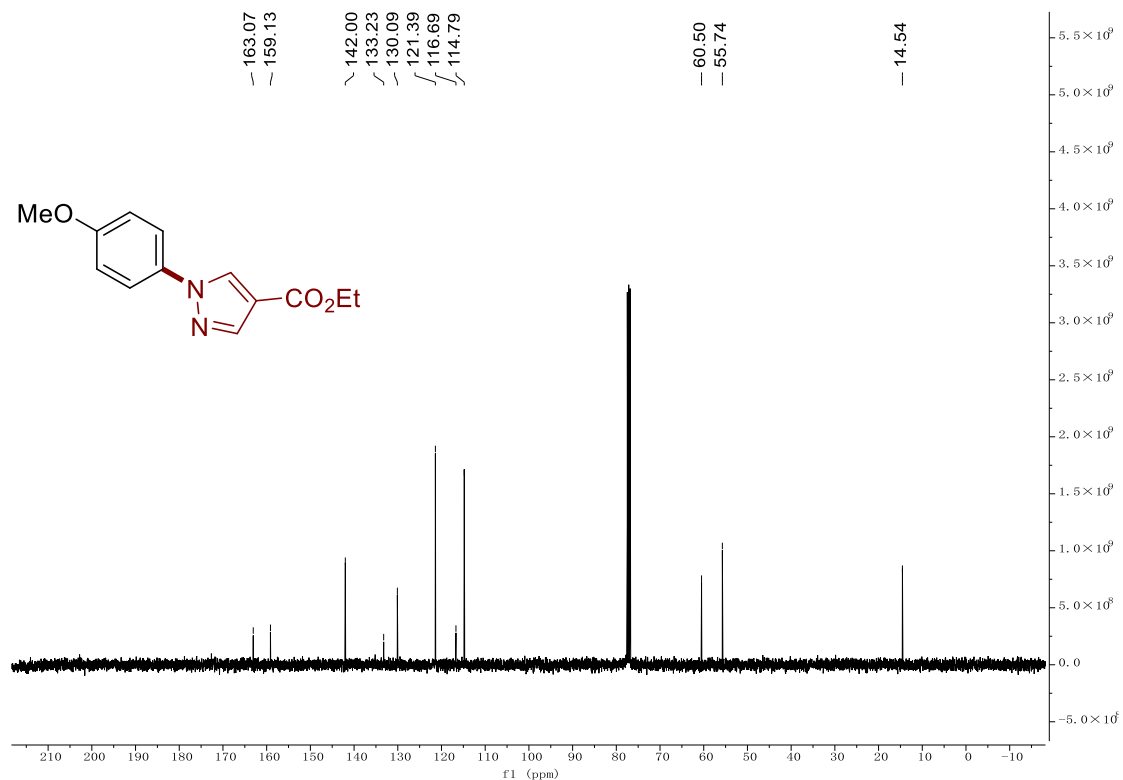

### <sup>1</sup>H NMR Spectrum of 3b (400 MHz, CDCl<sub>3</sub>)

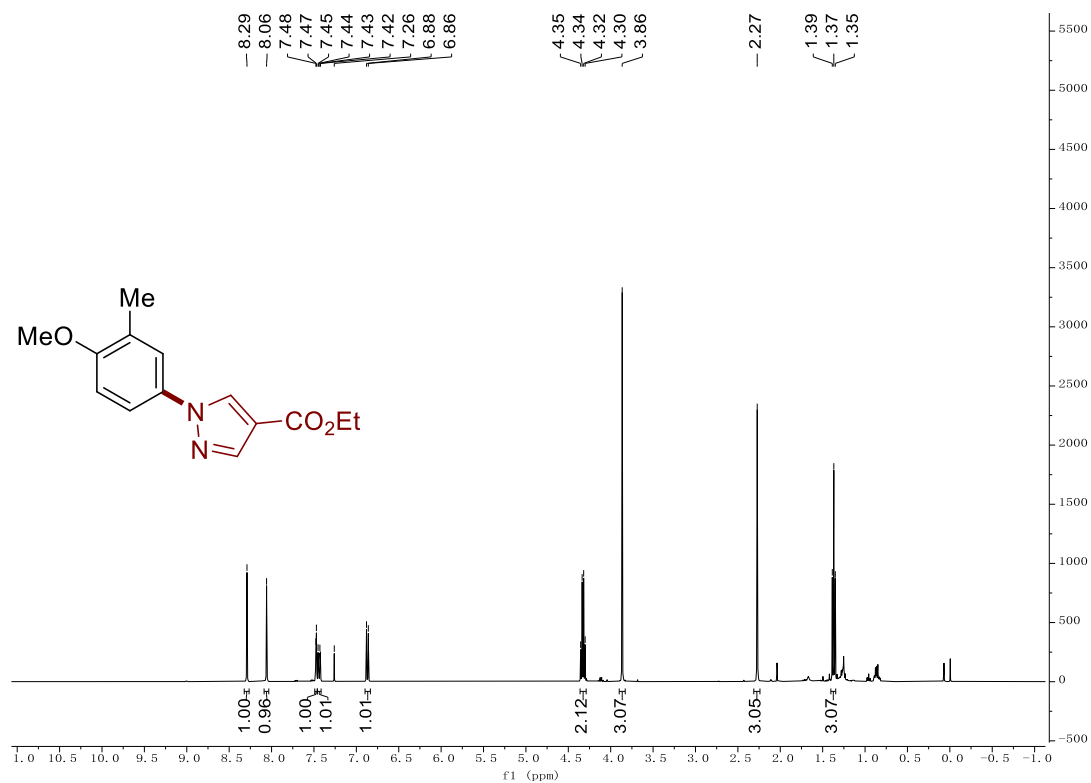

### <sup>13</sup>C NMR Spectrum of 3b (400 MHz, CDCl<sub>3</sub>)

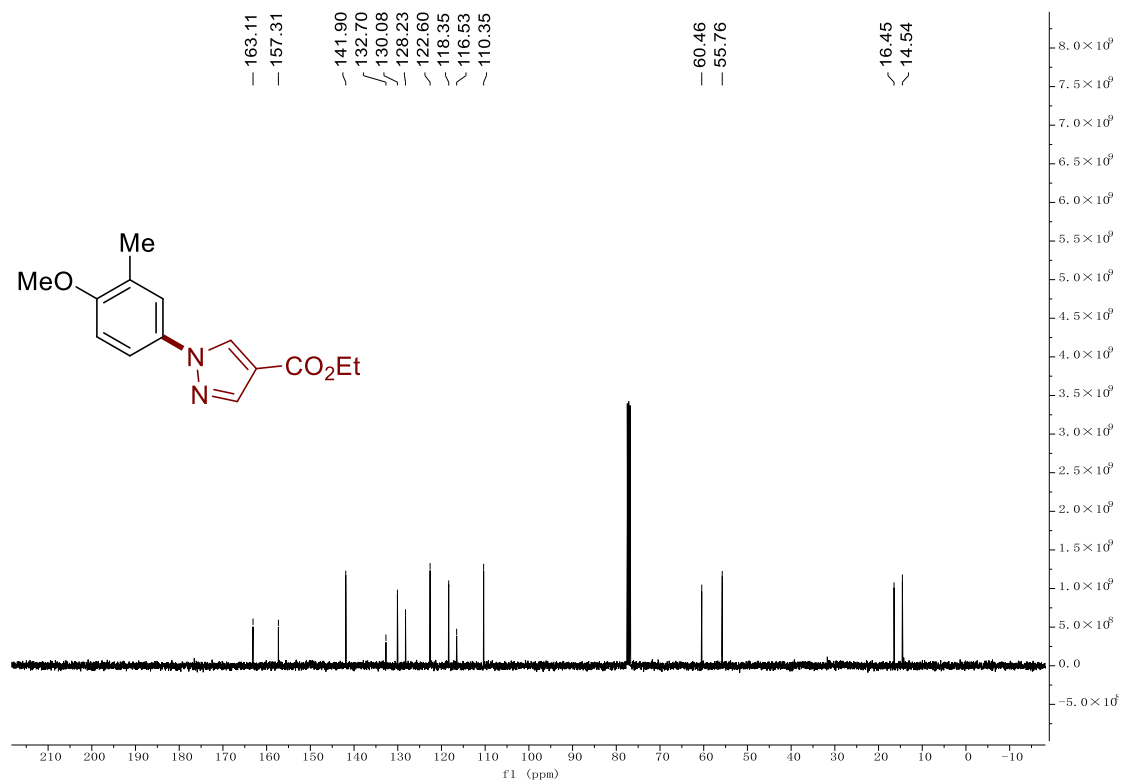

### <sup>1</sup>H NMR Spectrum of 3c (400 MHz, CDCl<sub>3</sub>)

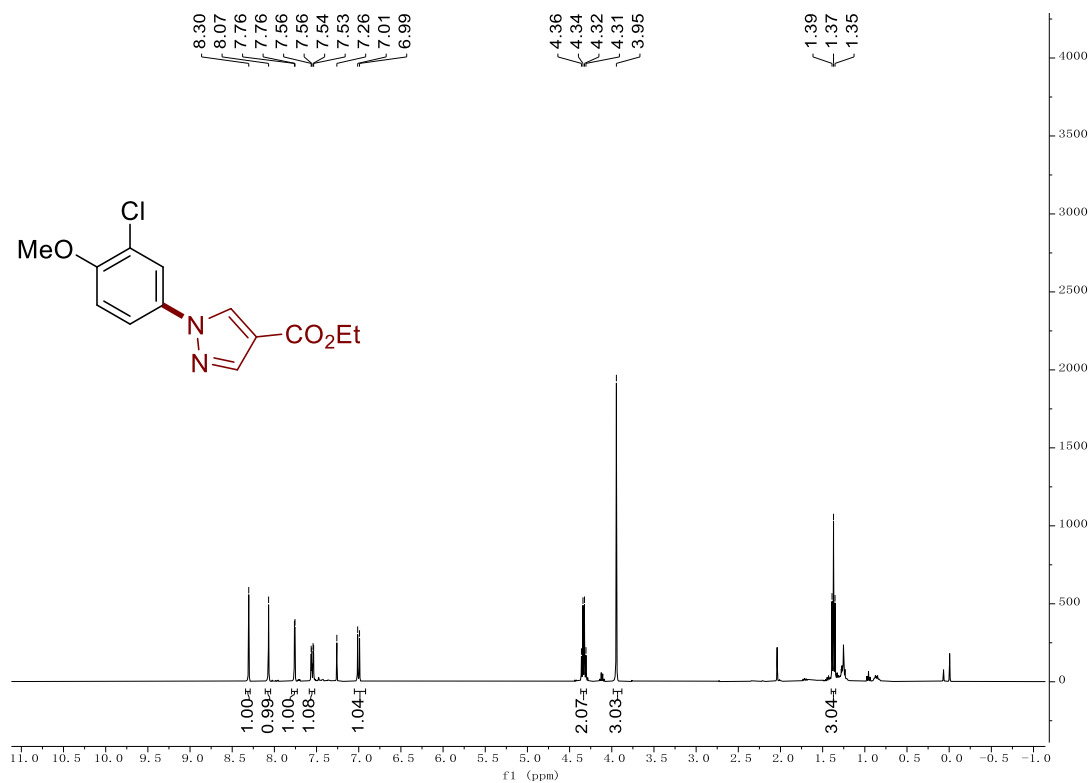

### <sup>13</sup>C NMR Spectrum of 3c (400 MHz, CDCl<sub>3</sub>)

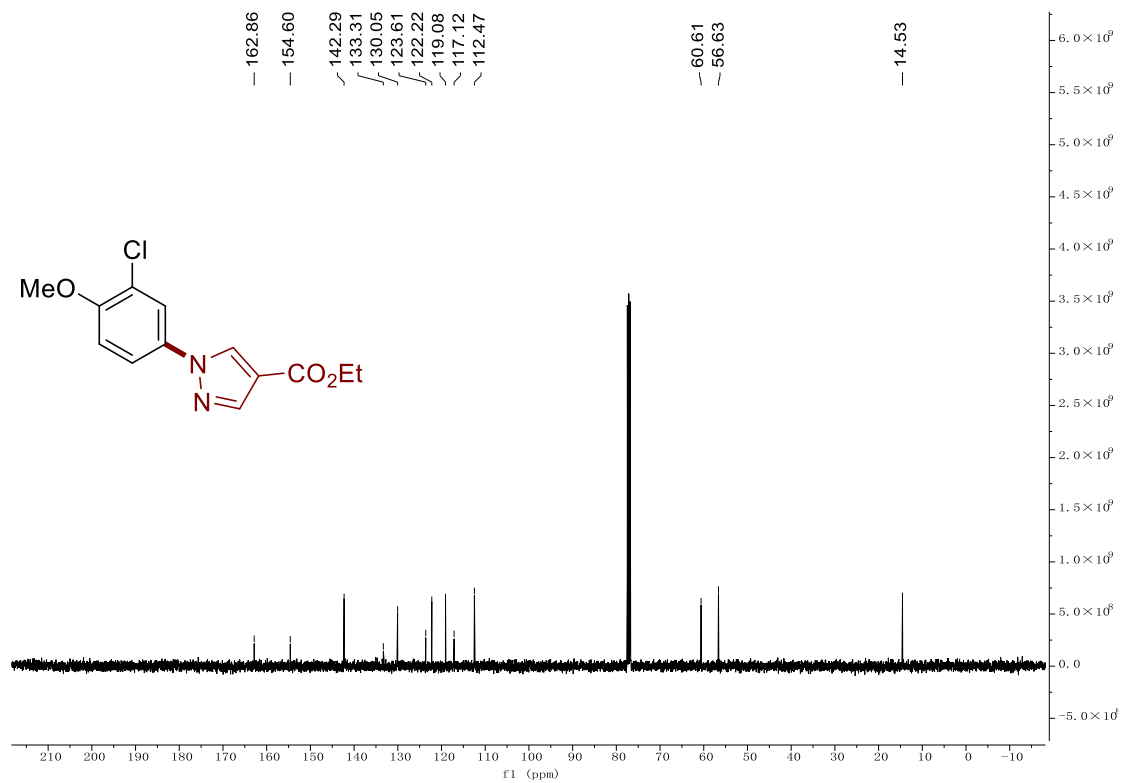

### <sup>1</sup>H NMR Spectrum of 3d (400 MHz, CDCl<sub>3</sub>)

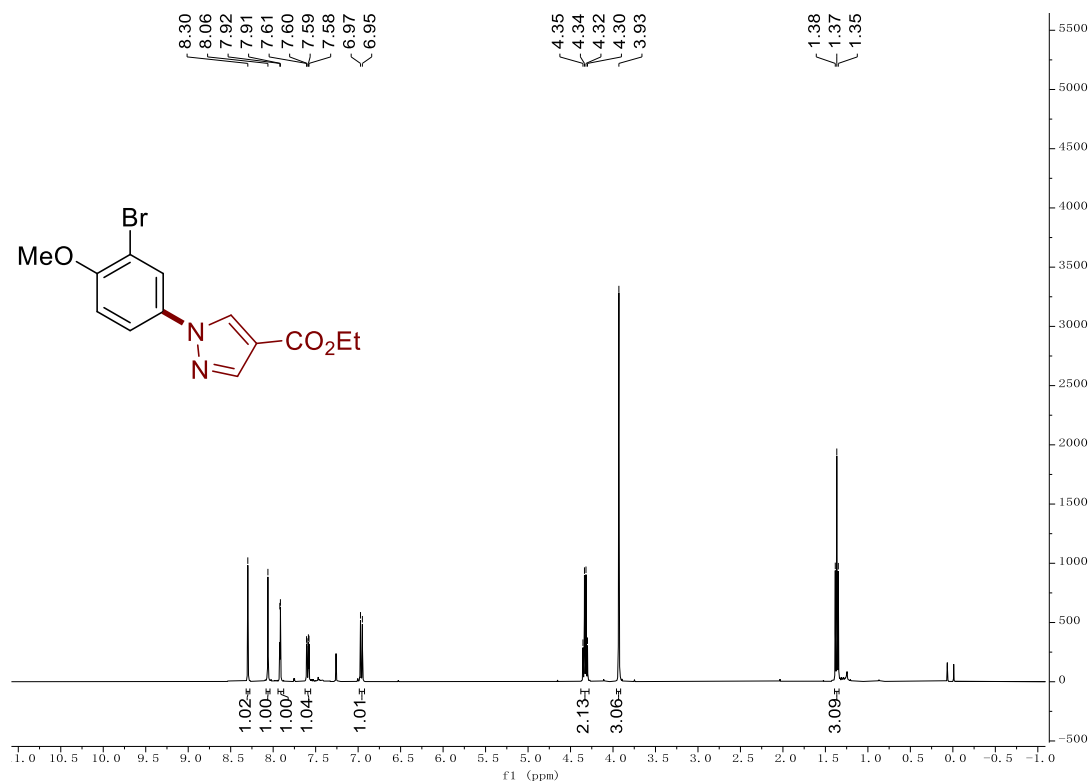

### <sup>13</sup>C NMR Spectrum of 3d (400 MHz, CDCl<sub>3</sub>)

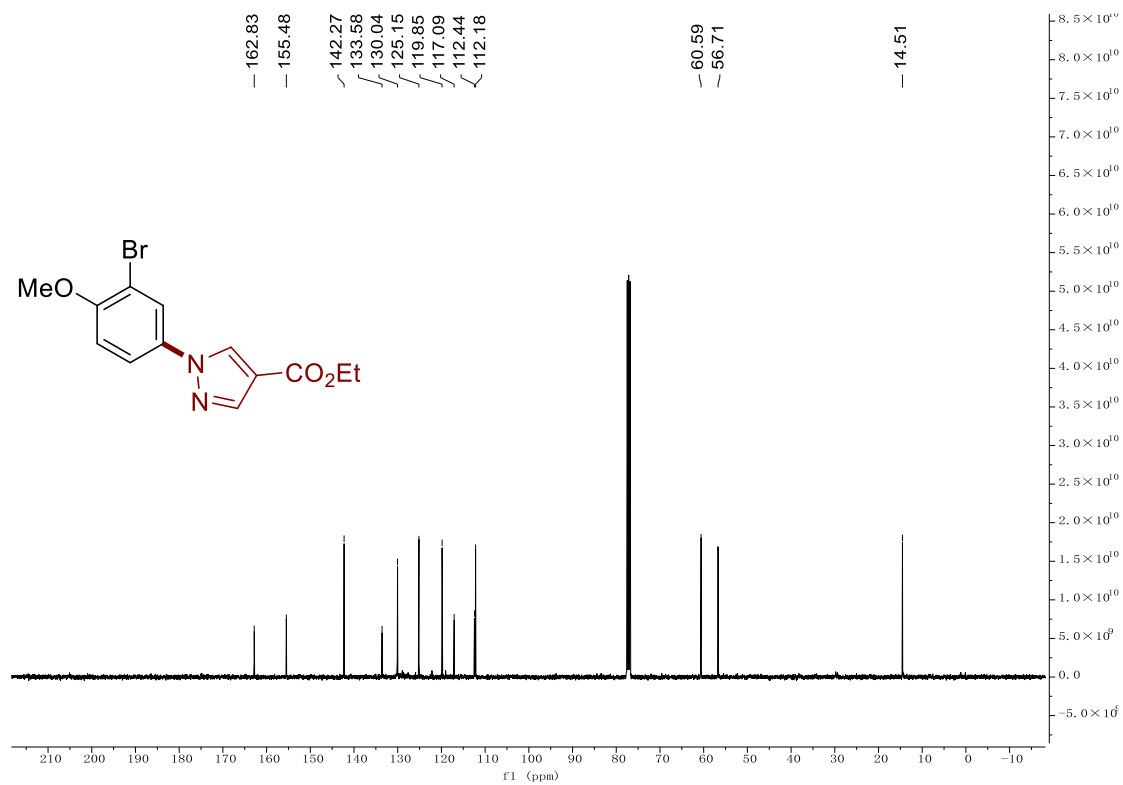



### <sup>1</sup>H NMR Spectrum of 3e (400 MHz, CDCl<sub>3</sub>)

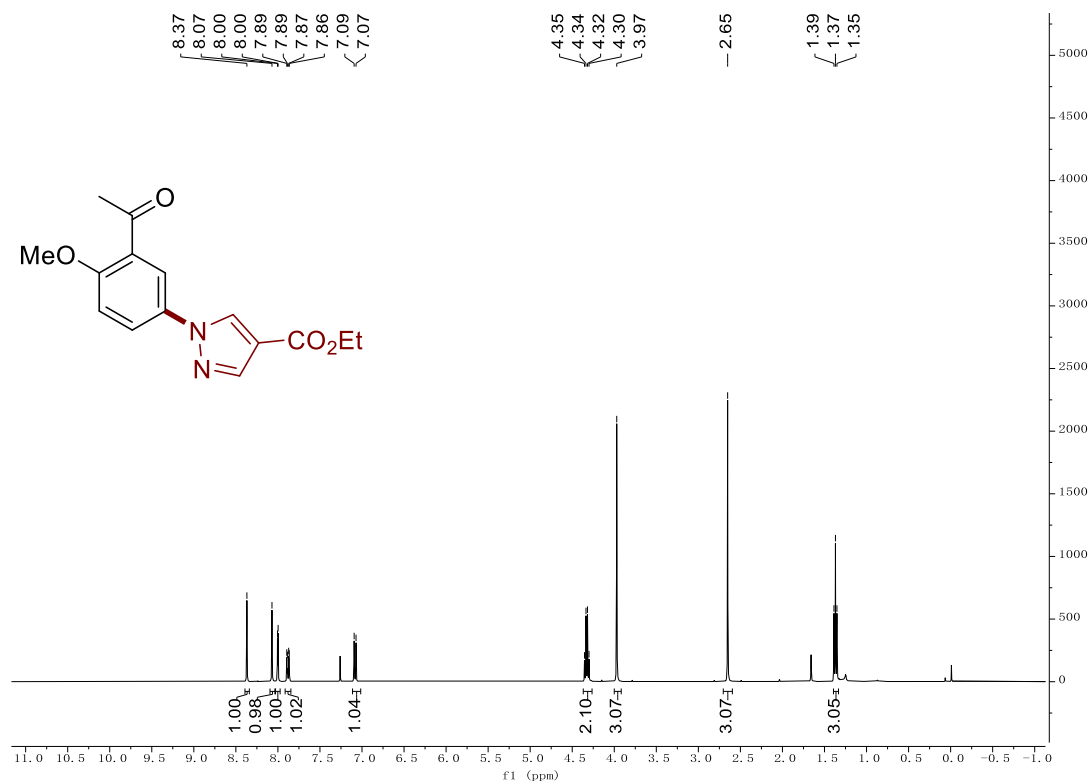

### <sup>13</sup>C NMR Spectrum of 3e (400 MHz, CDCl<sub>3</sub>)

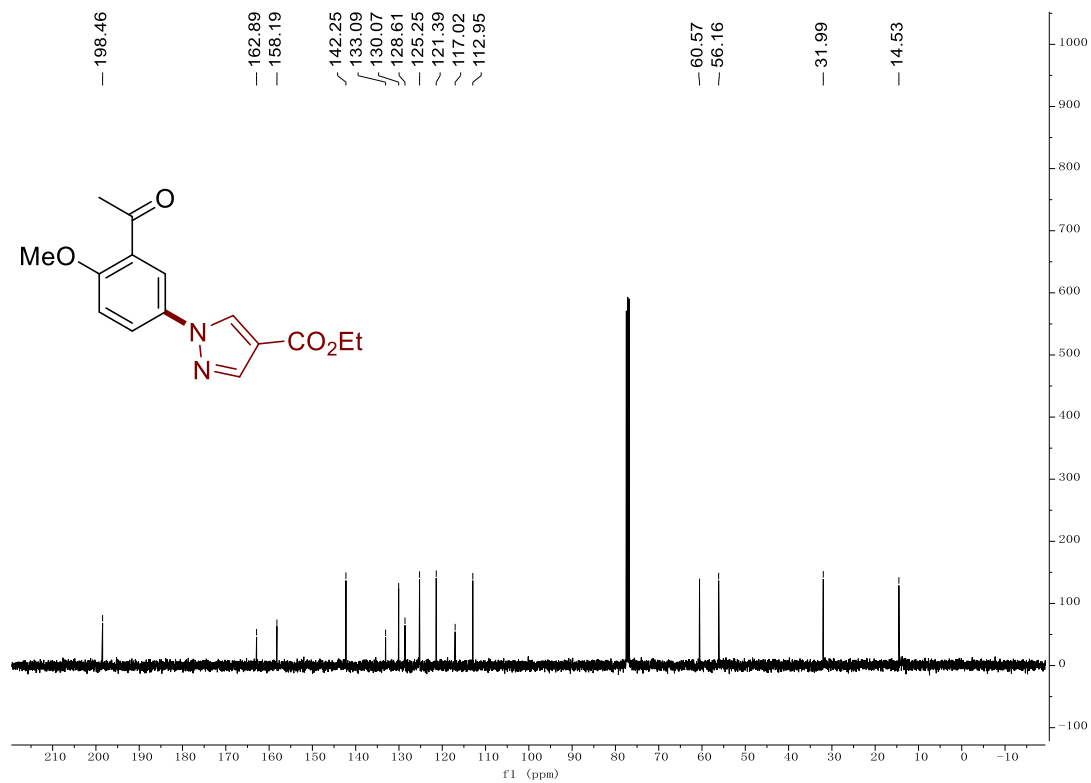

### <sup>1</sup>H NMR Spectrum of 3f (400 MHz, CDCl<sub>3</sub>)

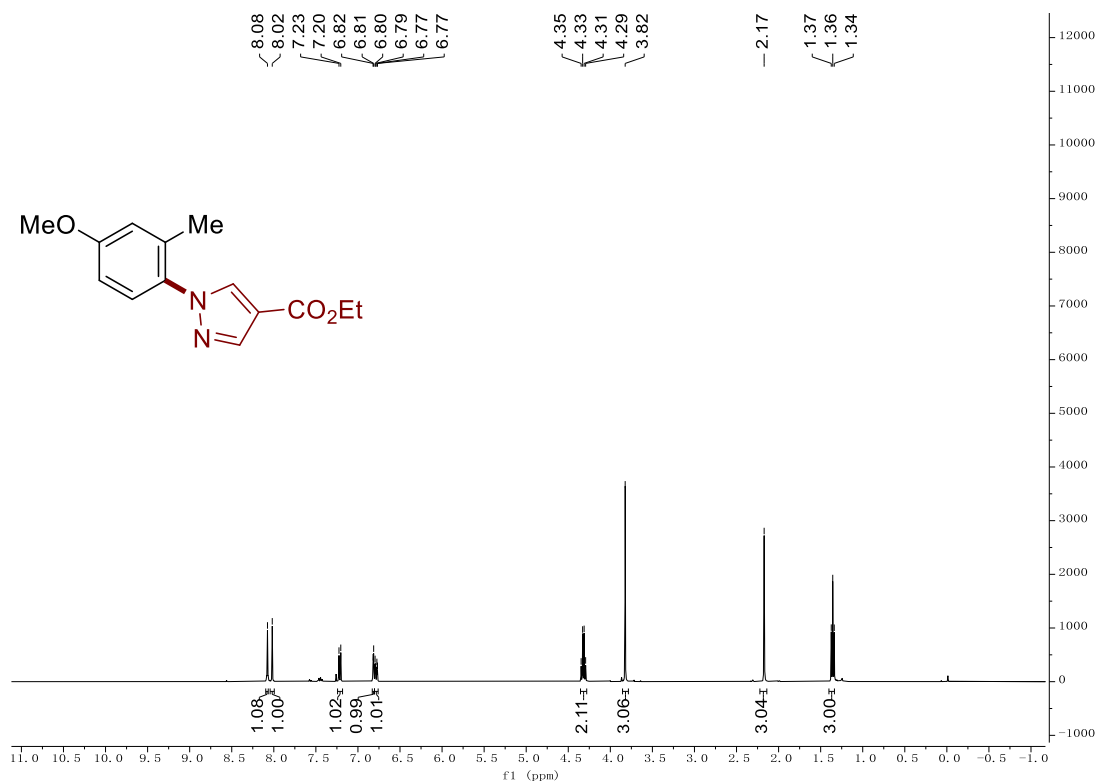

### <sup>13</sup>C NMR Spectrum of 3f (400 MHz, CDCl<sub>3</sub>)

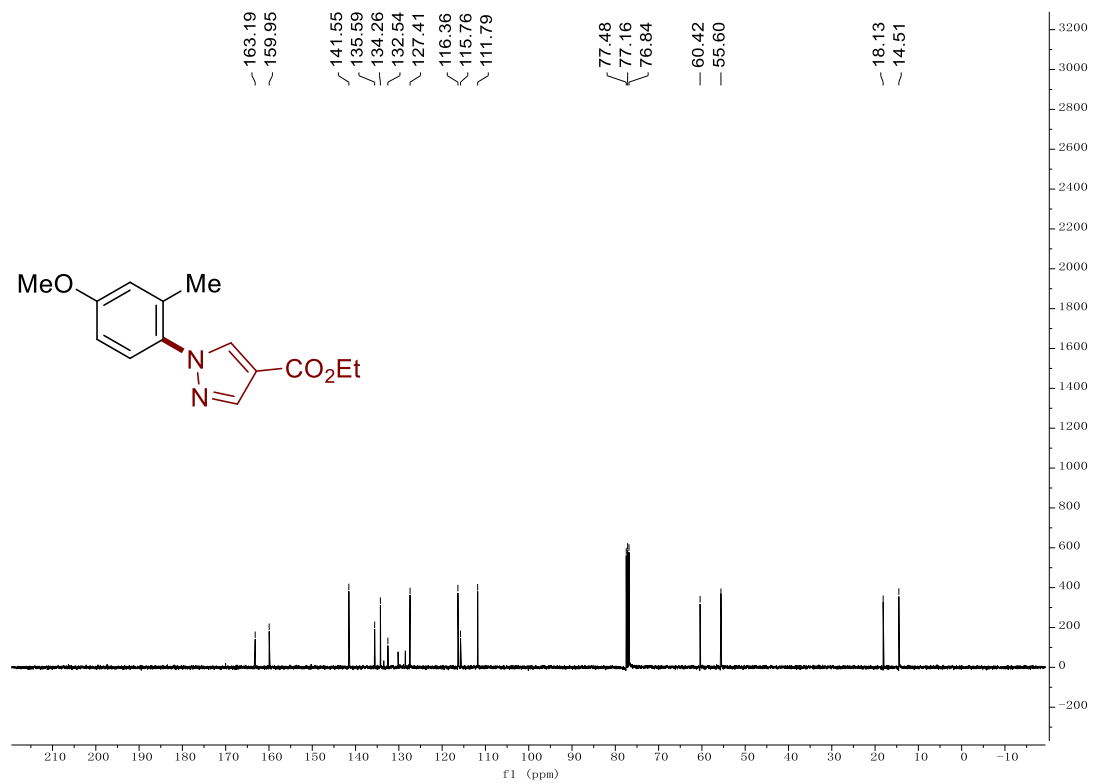

### <sup>1</sup>H NMR Spectrum of 3g (400 MHz, CDCl<sub>3</sub>)

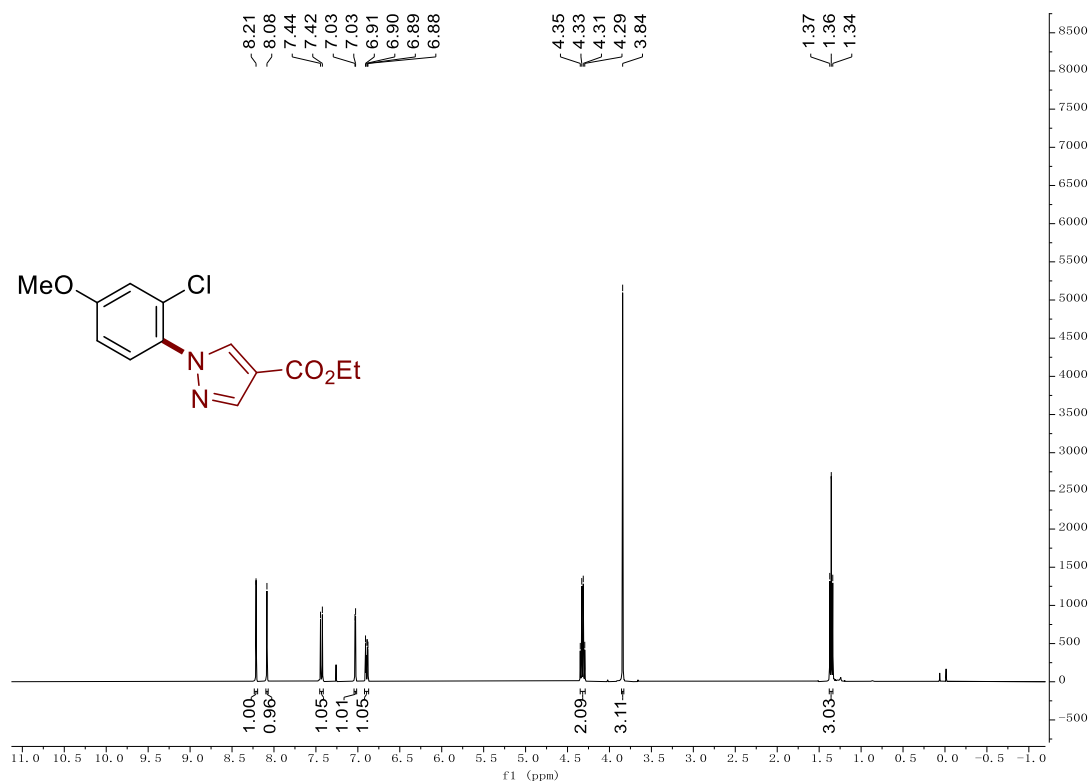

### <sup>13</sup>C NMR Spectrum of 3g (400 MHz, CDCl<sub>3</sub>)

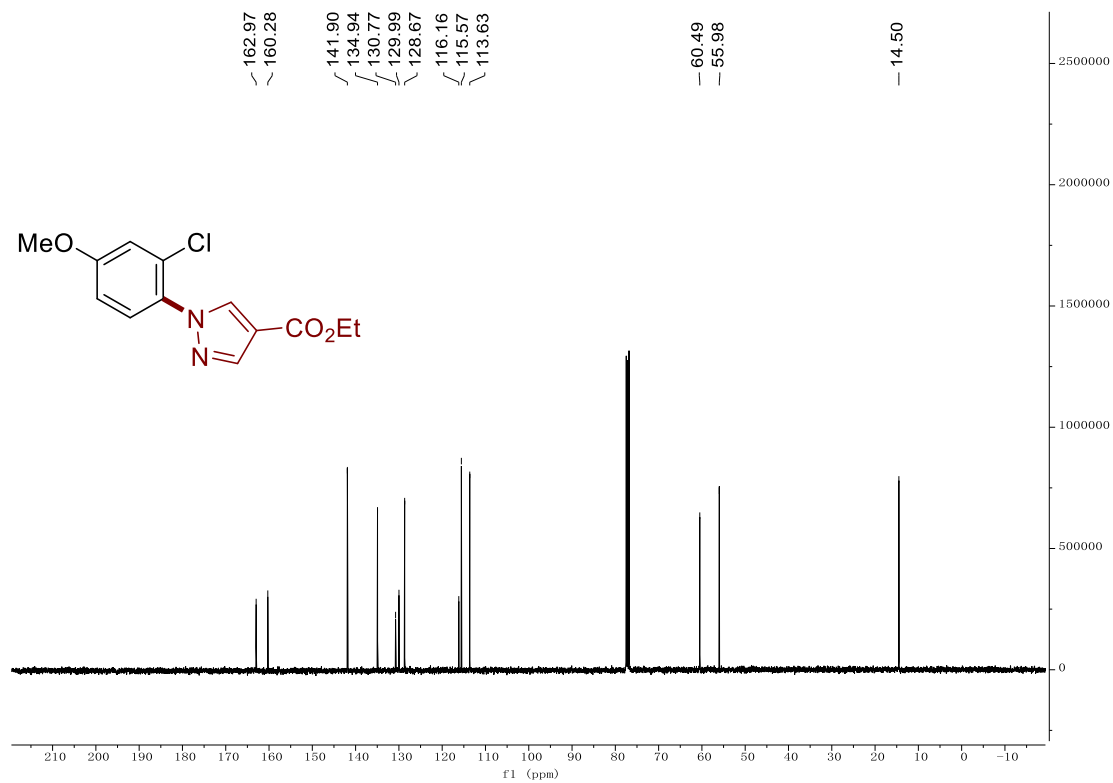

### <sup>1</sup>H NMR Spectrum of 3h (400 MHz, CDCl<sub>3</sub>)

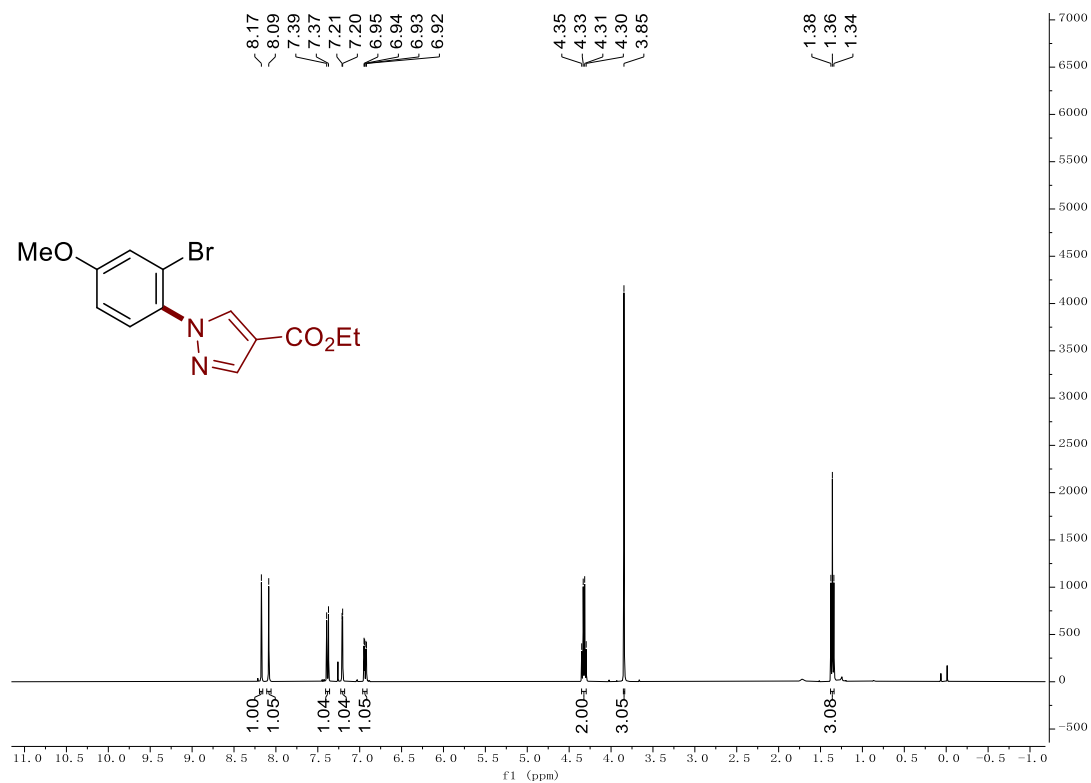

### <sup>13</sup>C NMR Spectrum of 3h (400 MHz, CDCl<sub>3</sub>)

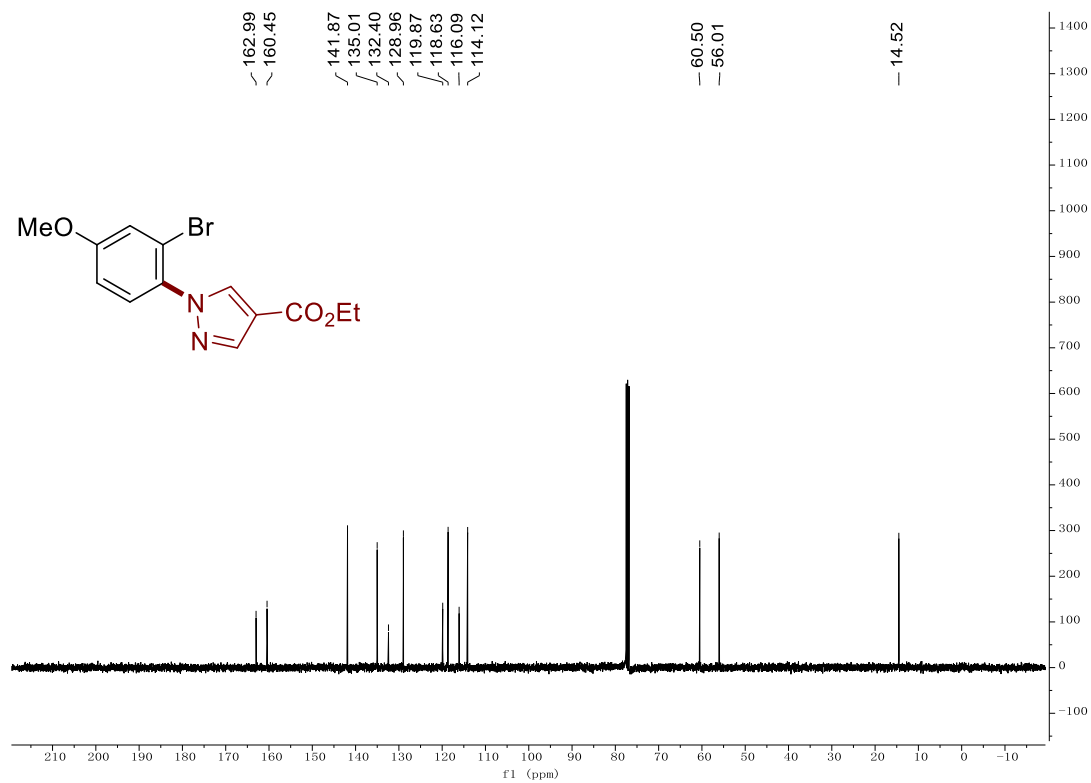

### <sup>1</sup>H NMR Spectrum of 3i (400 MHz, CDCl<sub>3</sub>)

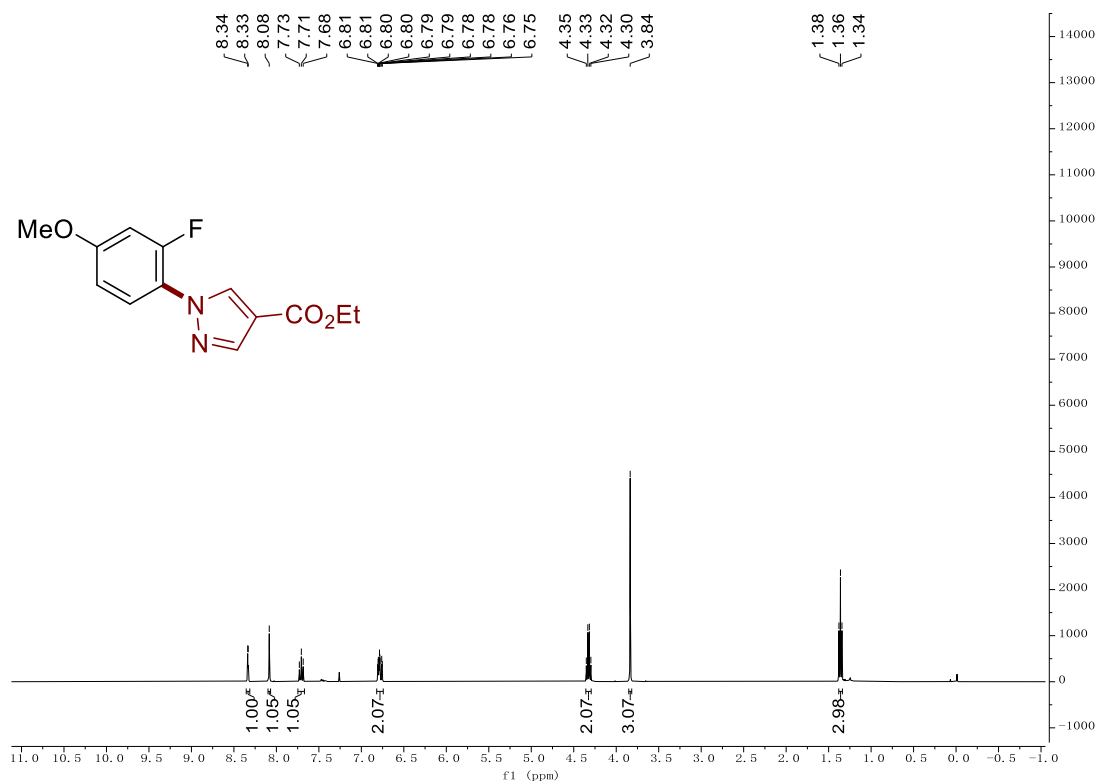

### <sup>13</sup>C NMR Spectrum of 3i (400 MHz, CDCl<sub>3</sub>)

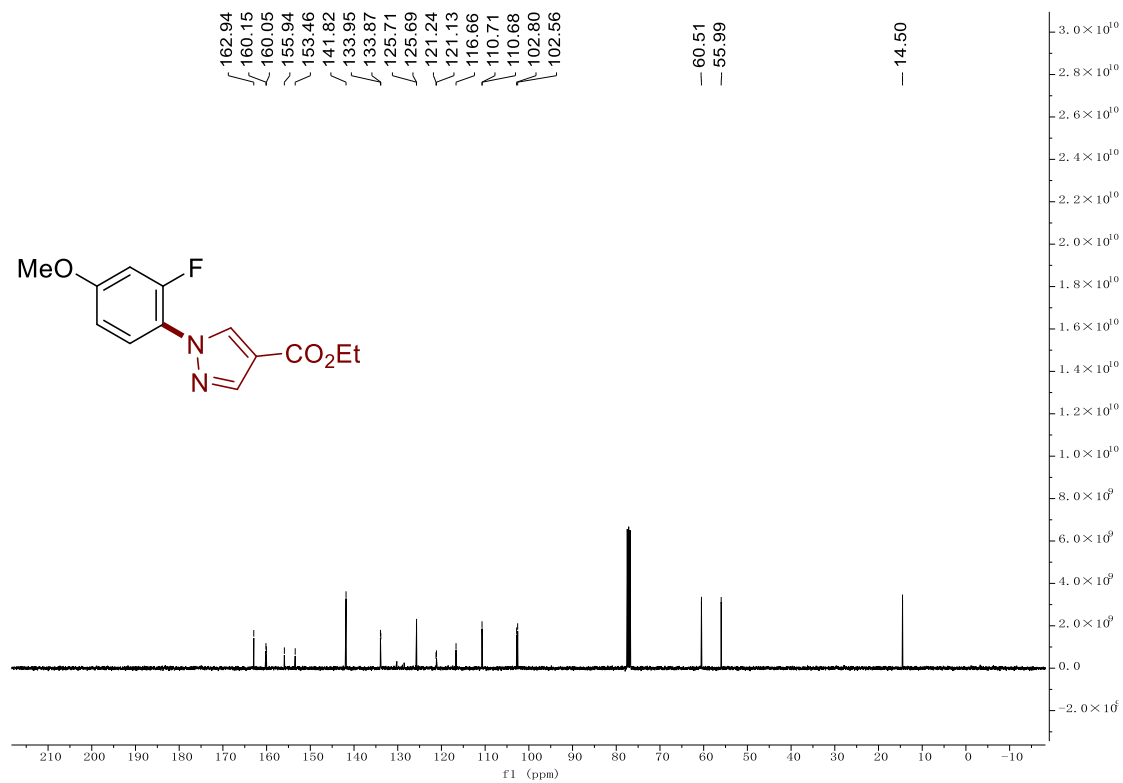

### $^{19}\text{F}$ NMR Spectrum of 3i (400 MHz, $\text{CDCl}_3$ )

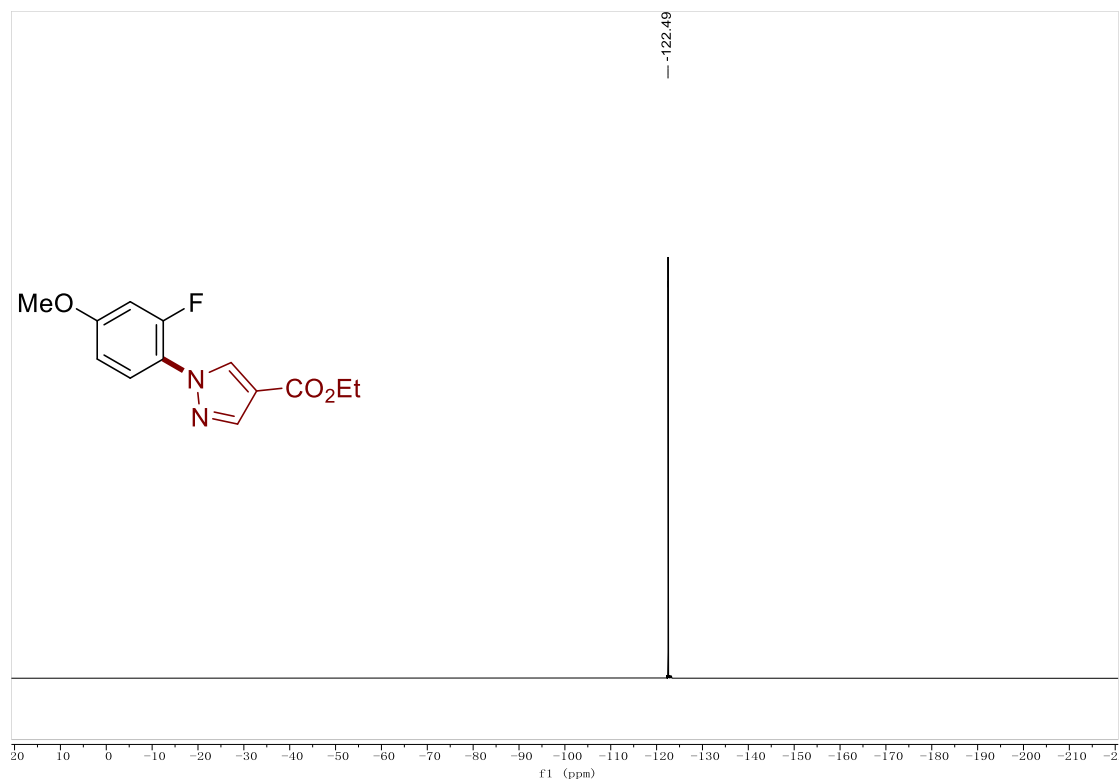

### $^1\text{H}$ NMR Spectrum of 3j (400 MHz, $\text{CDCl}_3$ )

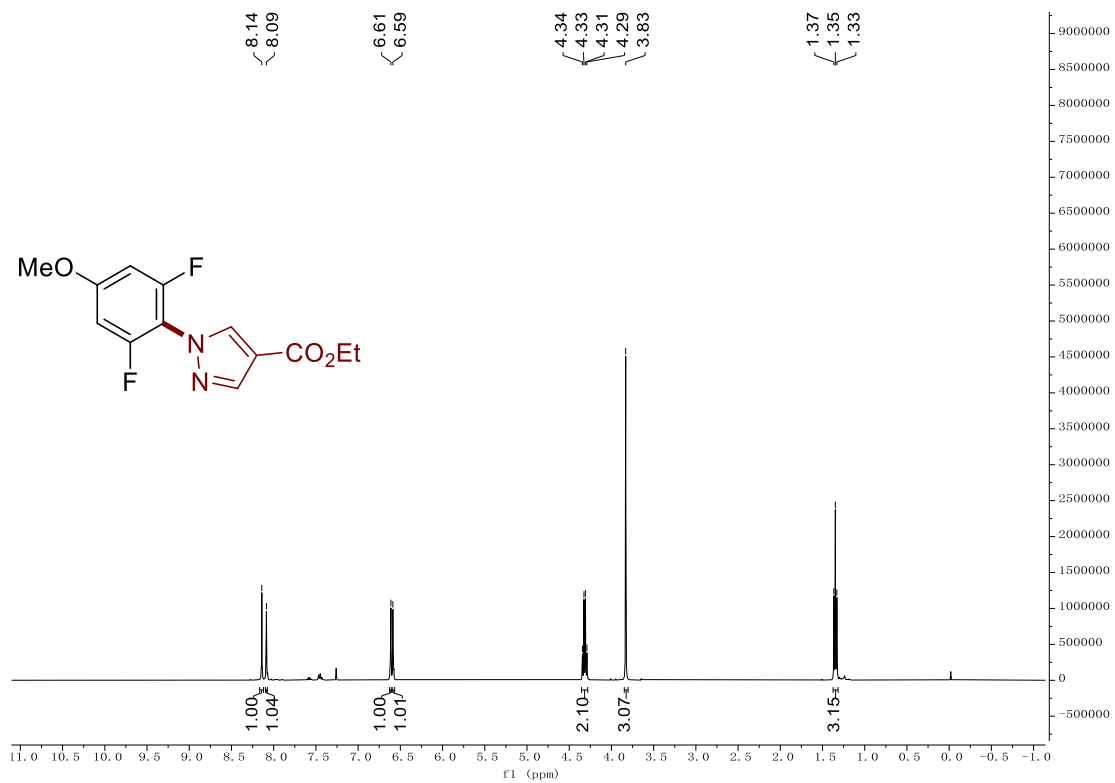

### <sup>13</sup>C NMR Spectrum of 3j (400 MHz, CDCl<sub>3</sub>)

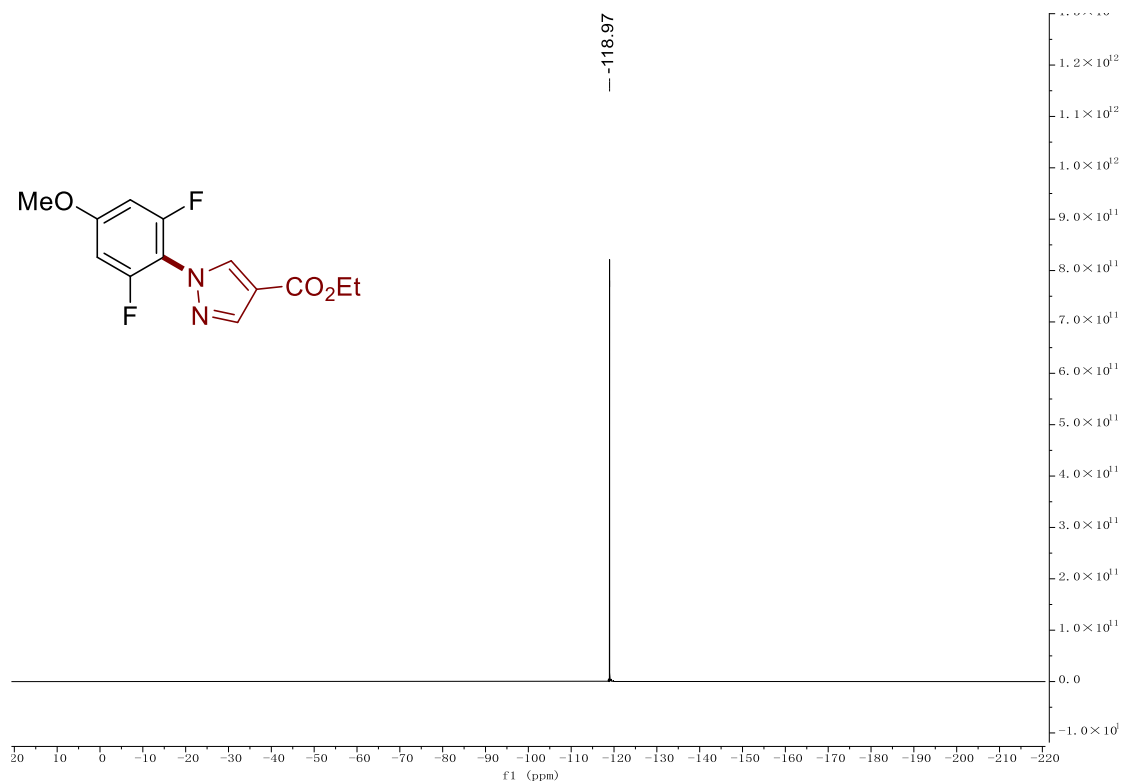

### <sup>19</sup>F NMR Spectrum of 3j (400 MHz, CDCl<sub>3</sub>)

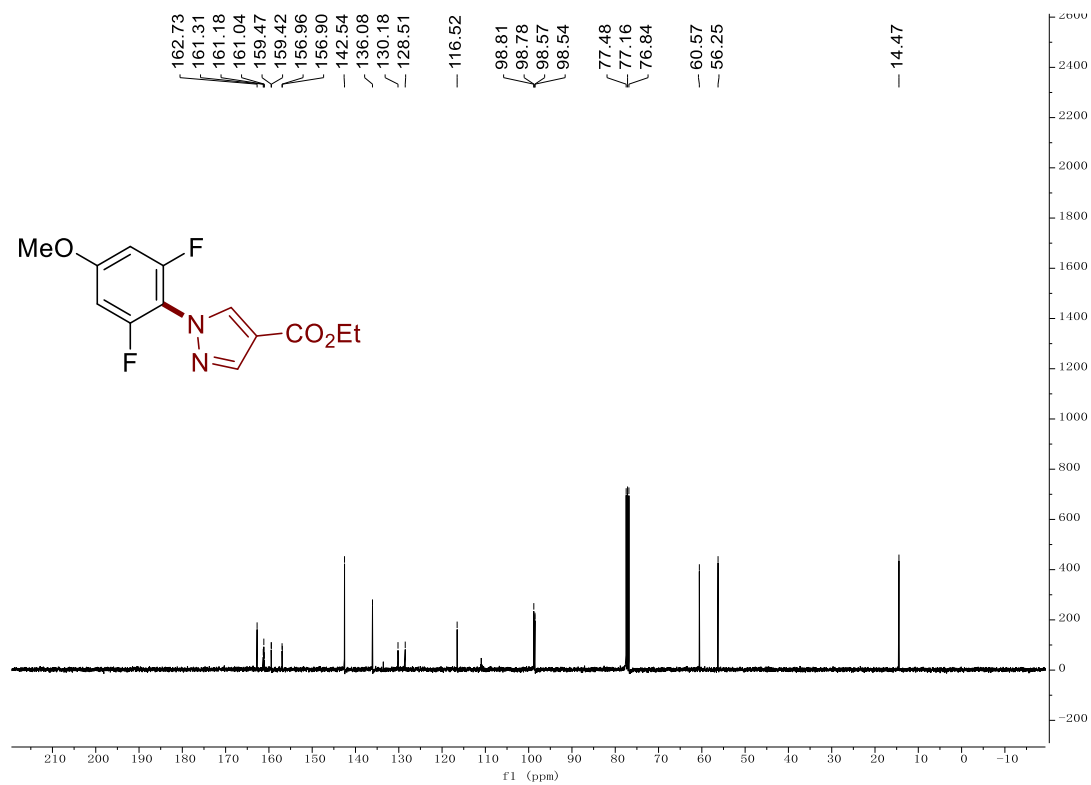

### <sup>1</sup>H NMR Spectrum of 3k (400 MHz, CDCl<sub>3</sub>)

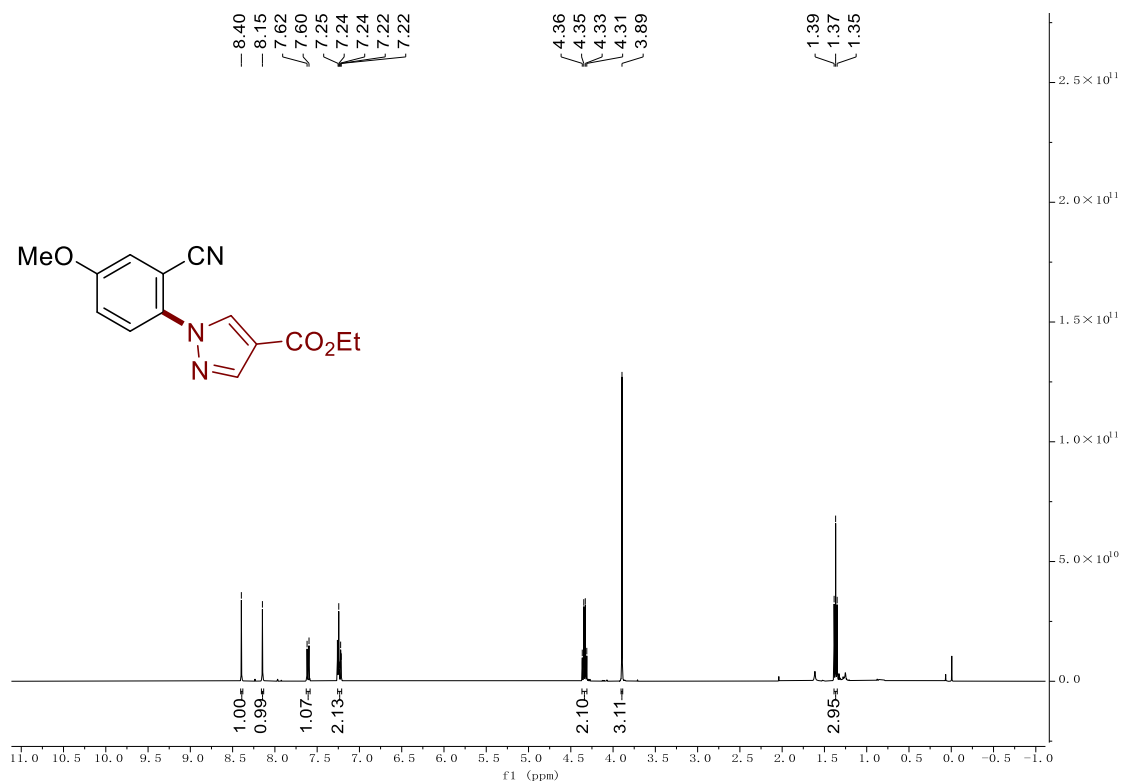

### <sup>13</sup>C NMR Spectrum of 3k (400 MHz, CDCl<sub>3</sub>)

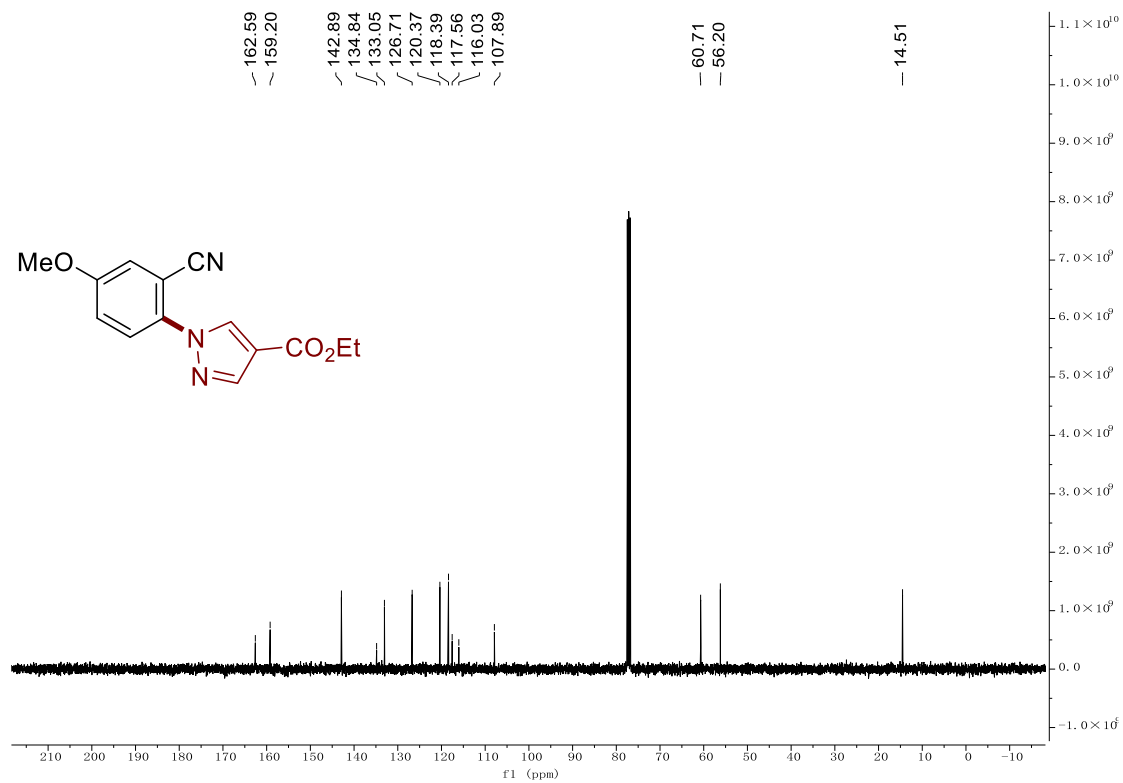



### <sup>1</sup>H NMR Spectrum of 31 (400 MHz, CDCl<sub>3</sub>)

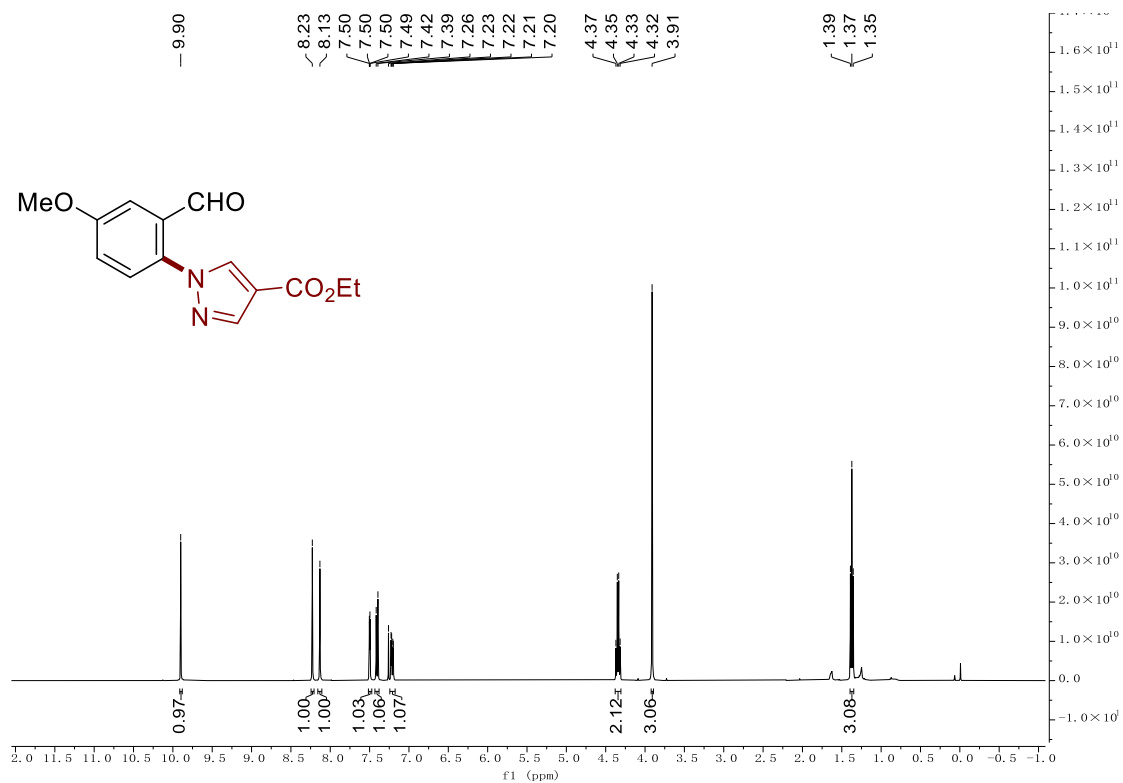

### <sup>13</sup>C NMR Spectrum of 31 (400 MHz, CDCl<sub>3</sub>)

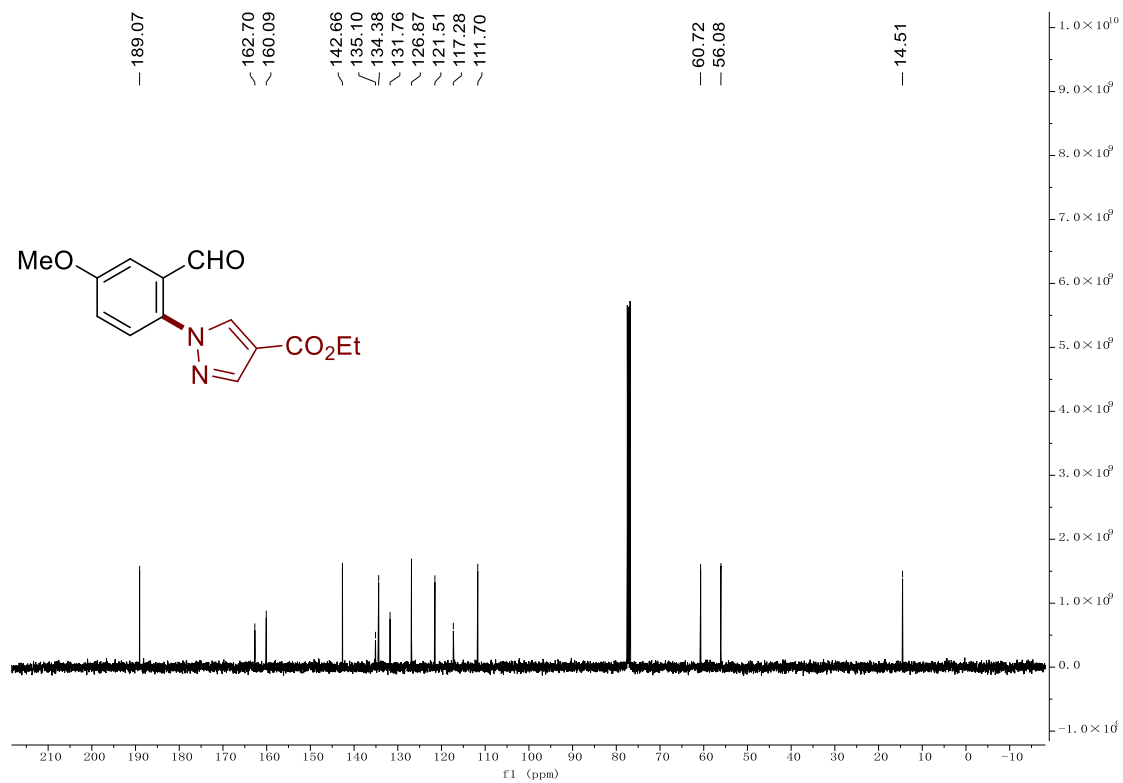

### <sup>1</sup>H NMR Spectrum of 3m (400 MHz, CDCl<sub>3</sub>)

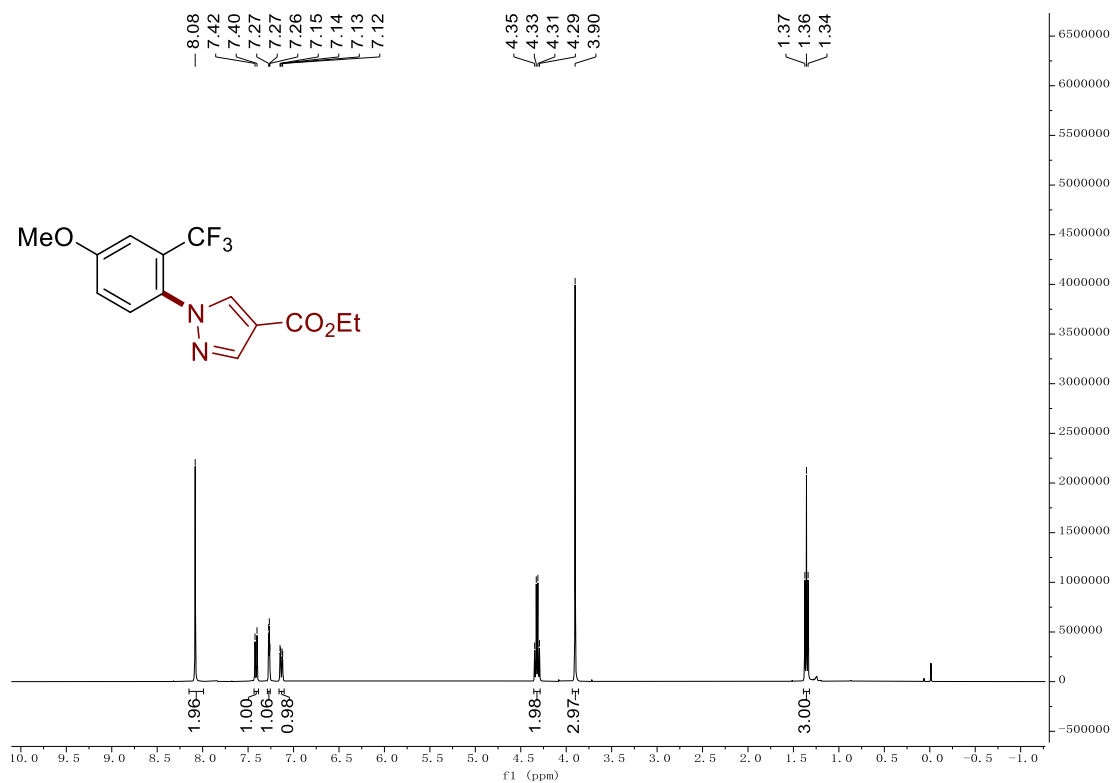

### <sup>13</sup>C NMR Spectrum of 3m (400 MHz, CDCl<sub>3</sub>)

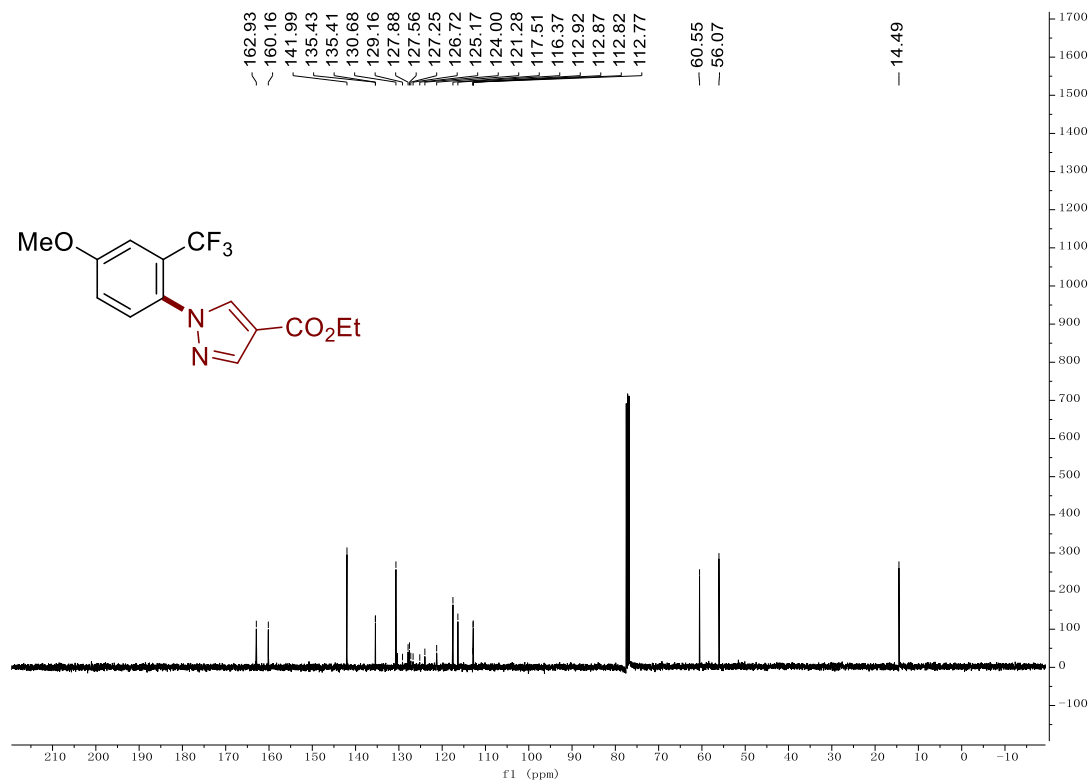

### <sup>19</sup>F NMR Spectrum of 3m (400 MHz, CDCl<sub>3</sub>)

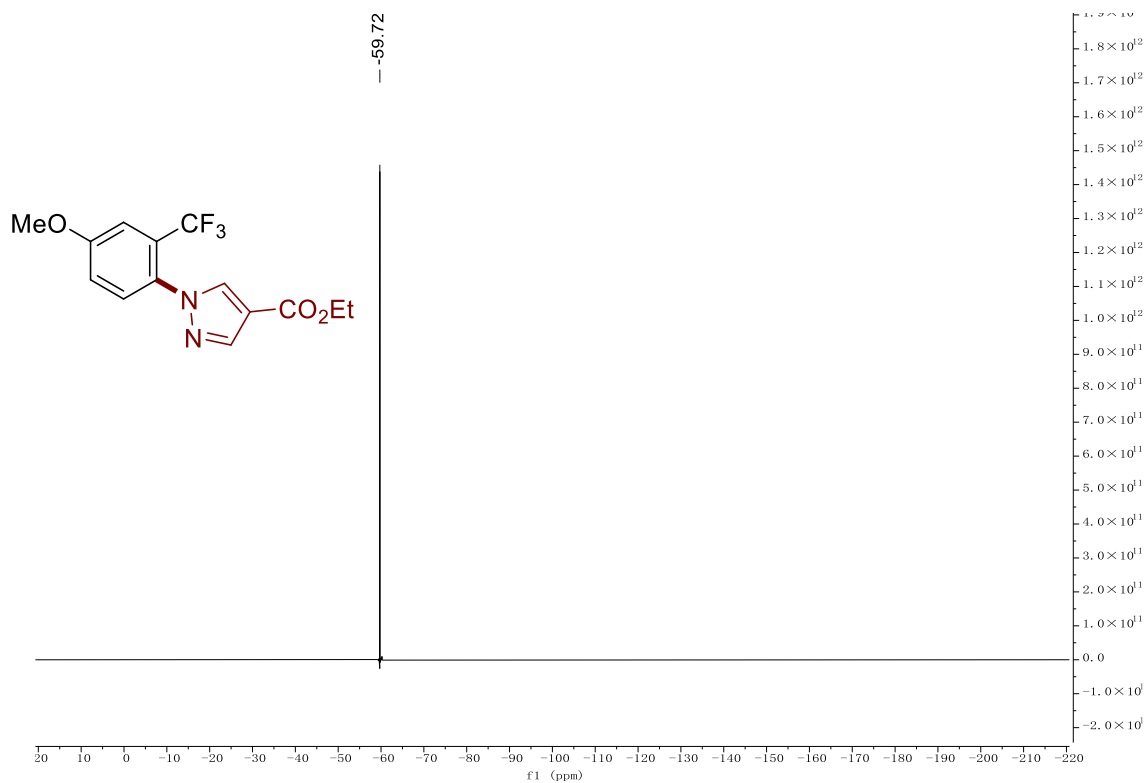

### <sup>1</sup>H NMR Spectrum of 3n (400 MHz, CDCl<sub>3</sub>)

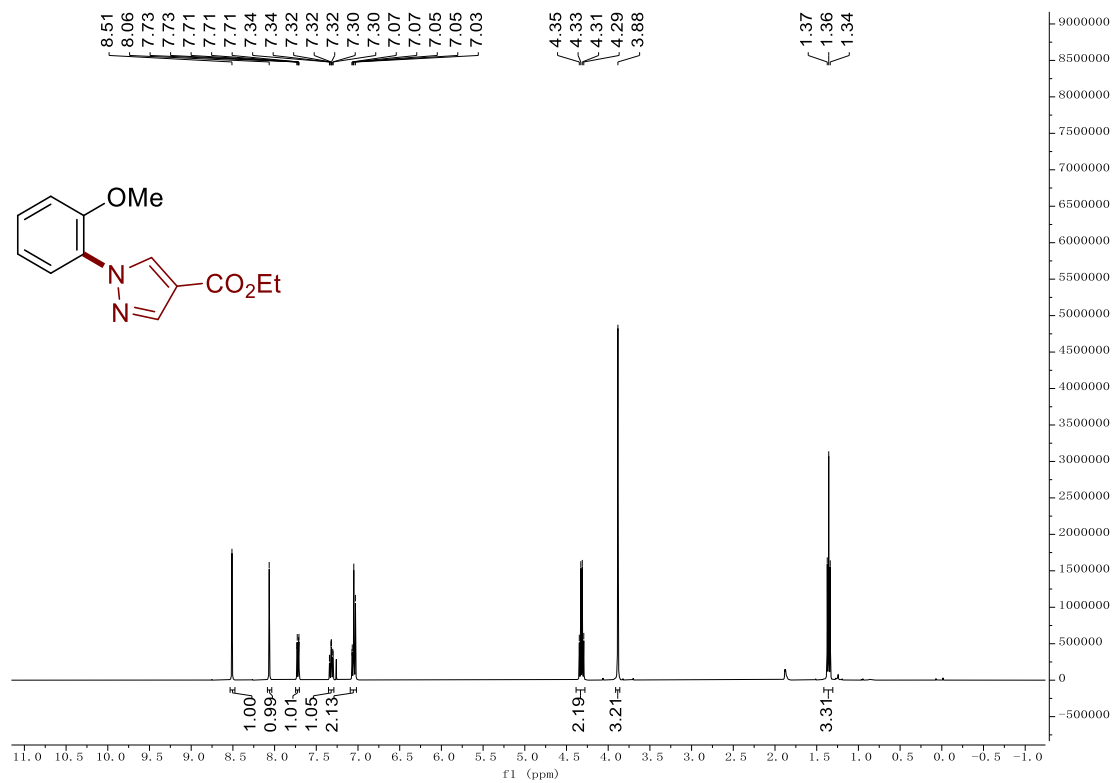

### <sup>13</sup>C NMR Spectrum of 3n (400 MHz, CDCl<sub>3</sub>)

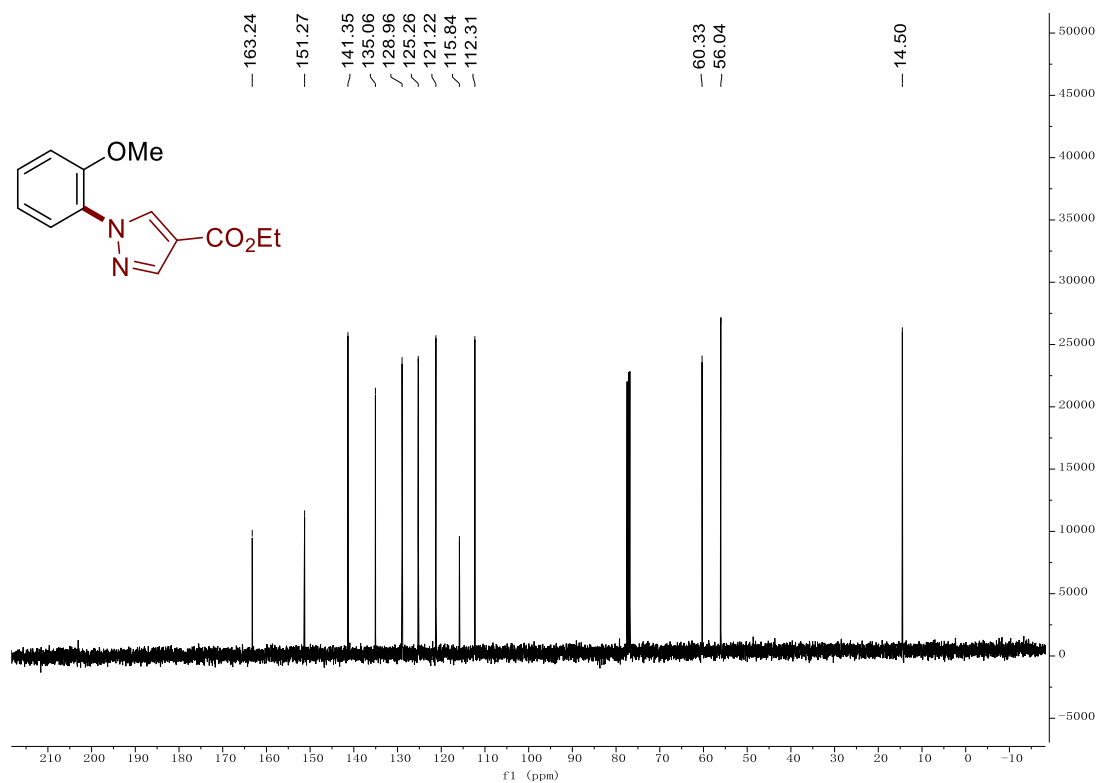

### <sup>1</sup>H NMR Spectrum of 3o (400 MHz, CDCl<sub>3</sub>)

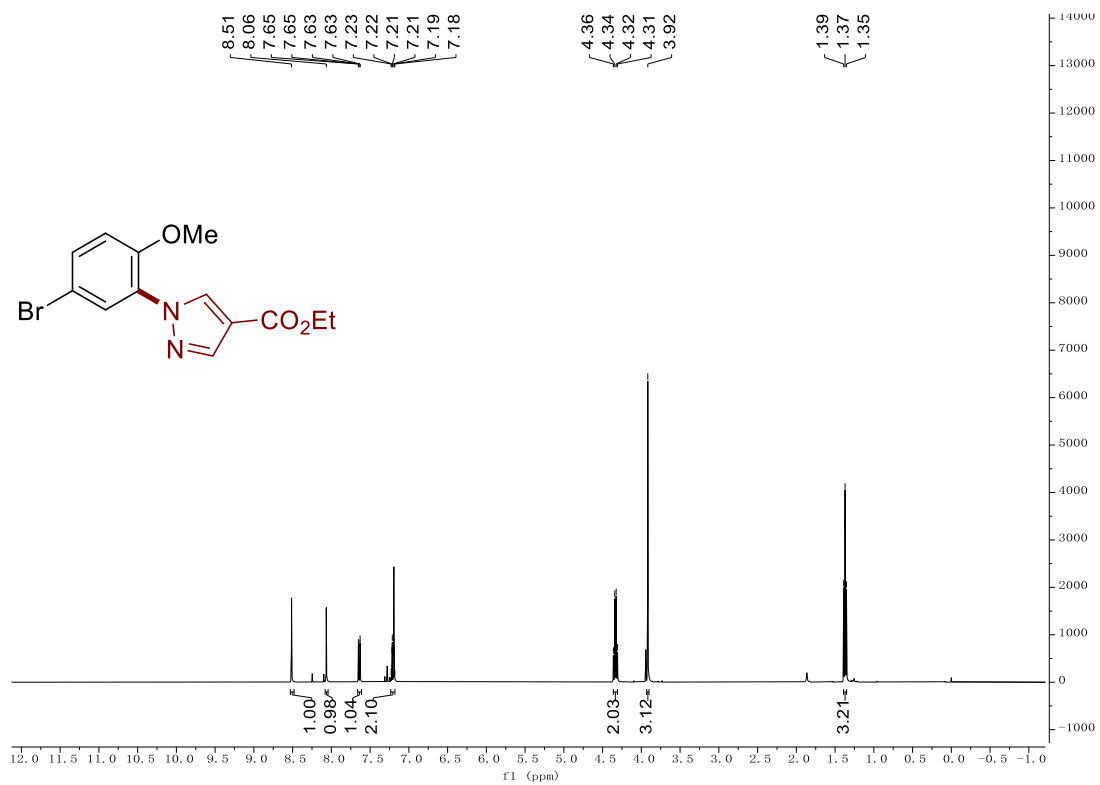

### <sup>13</sup>C NMR Spectrum of 3o (400 MHz, CDCl<sub>3</sub>)

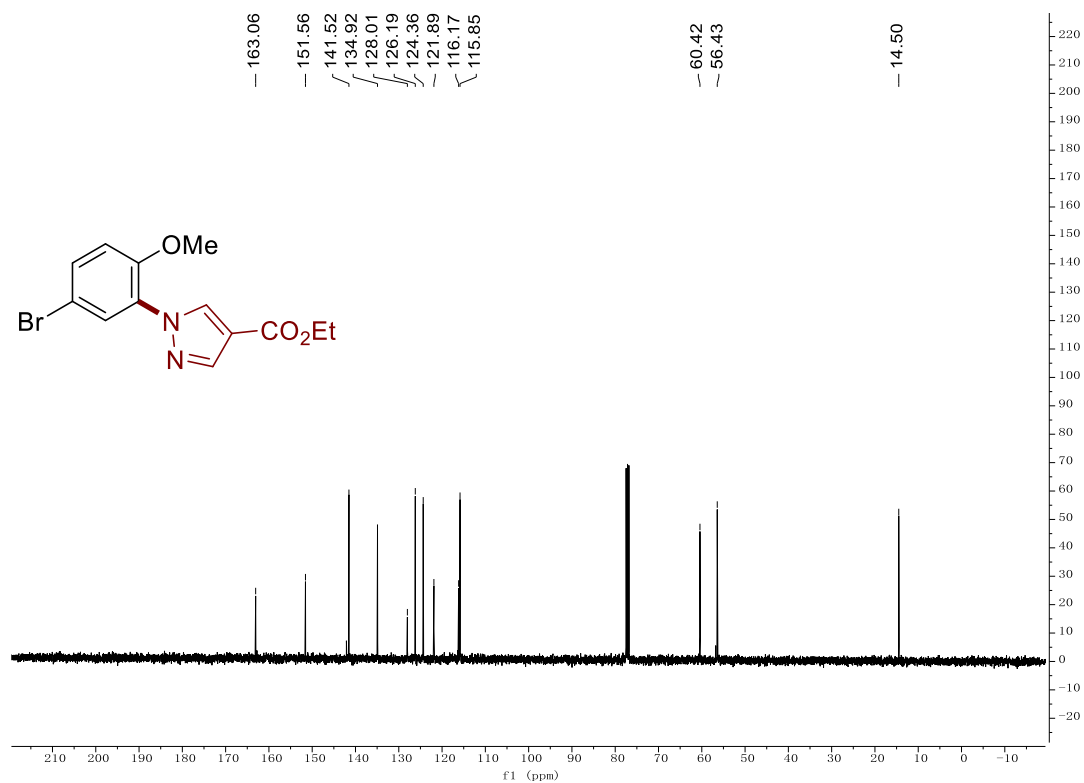

### <sup>1</sup>H NMR Spectrum of 3q (400 MHz, CDCl<sub>3</sub>)

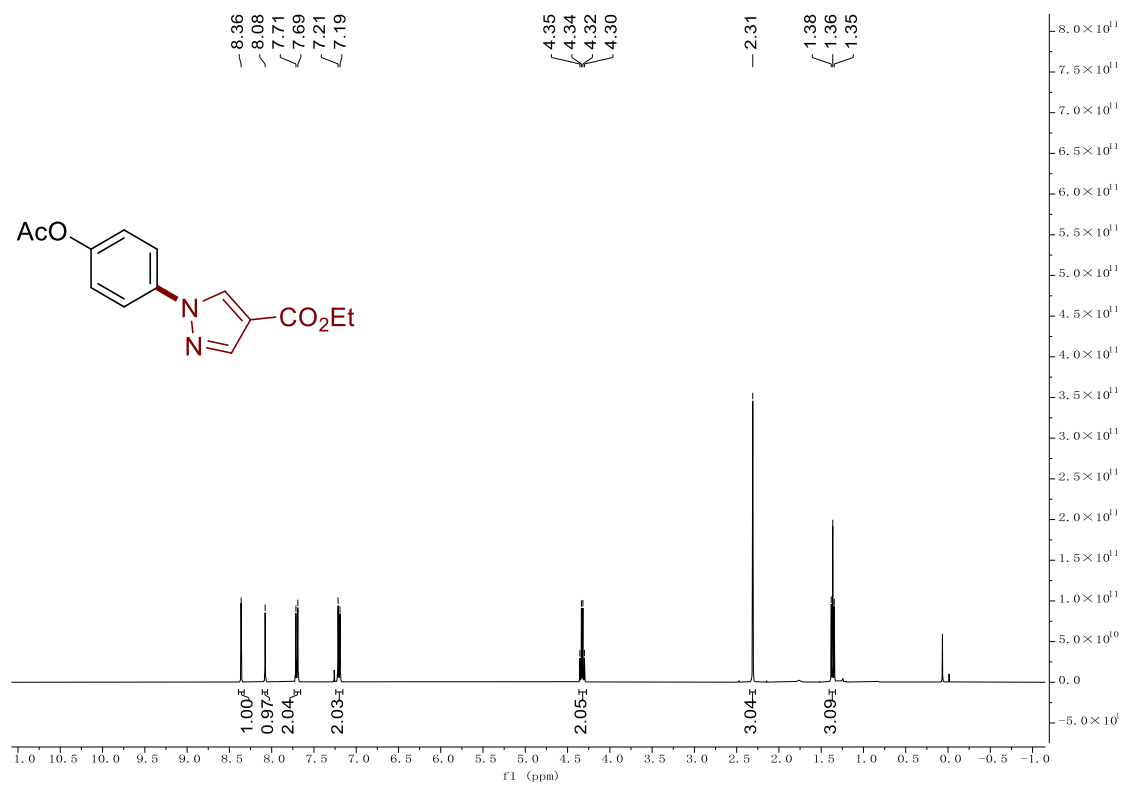

### <sup>13</sup>C NMR Spectrum of 3q (400 MHz, CDCl<sub>3</sub>)

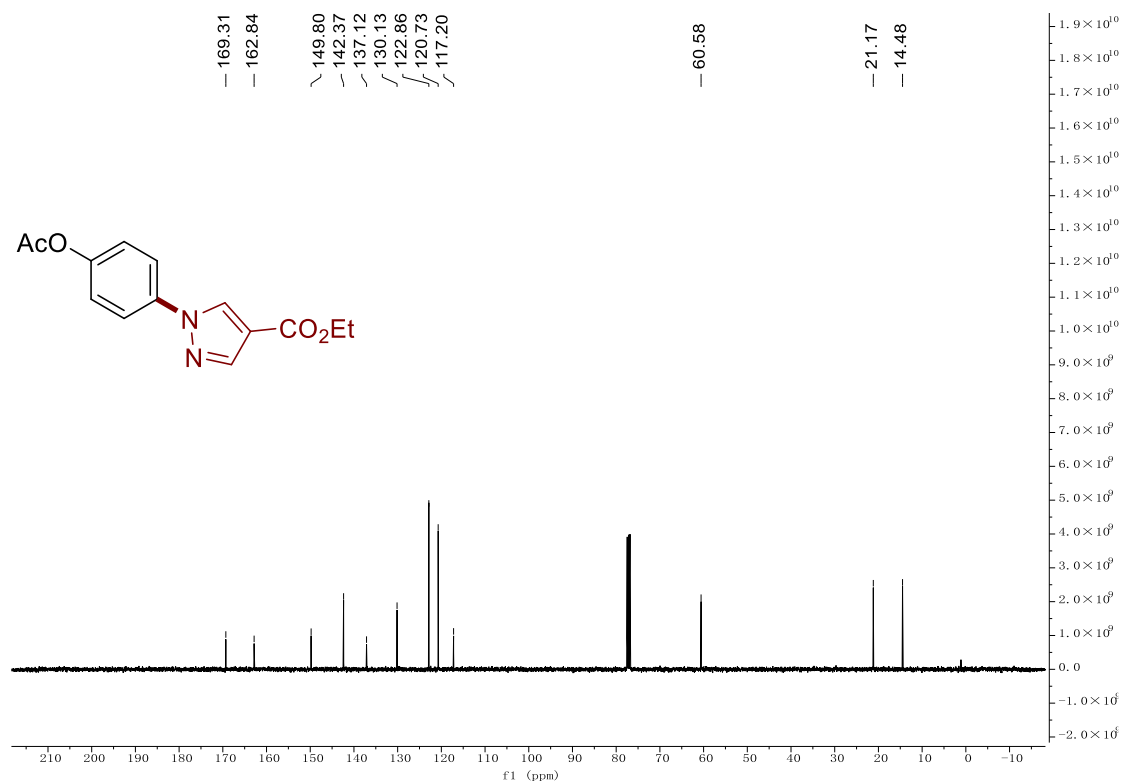

### <sup>1</sup>H NMR Spectrum of 3r (400 MHz, CDCl<sub>3</sub>)

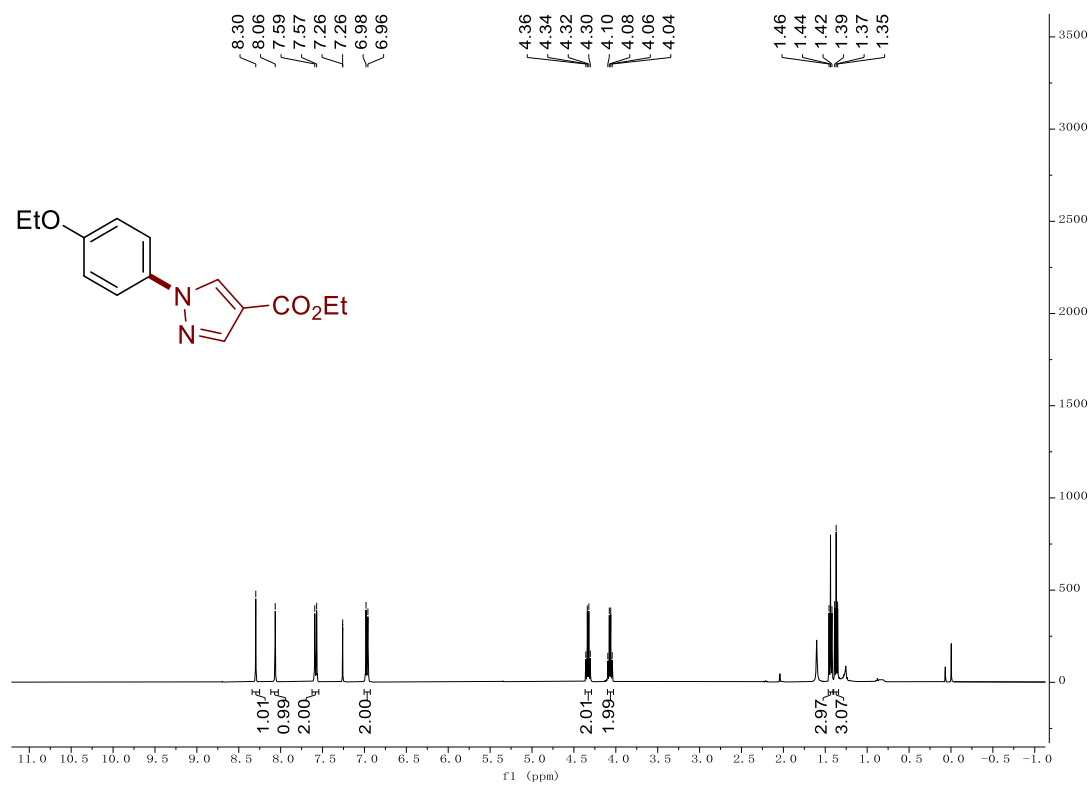

### <sup>13</sup>C NMR Spectrum of 3r (400 MHz, CDCl<sub>3</sub>)

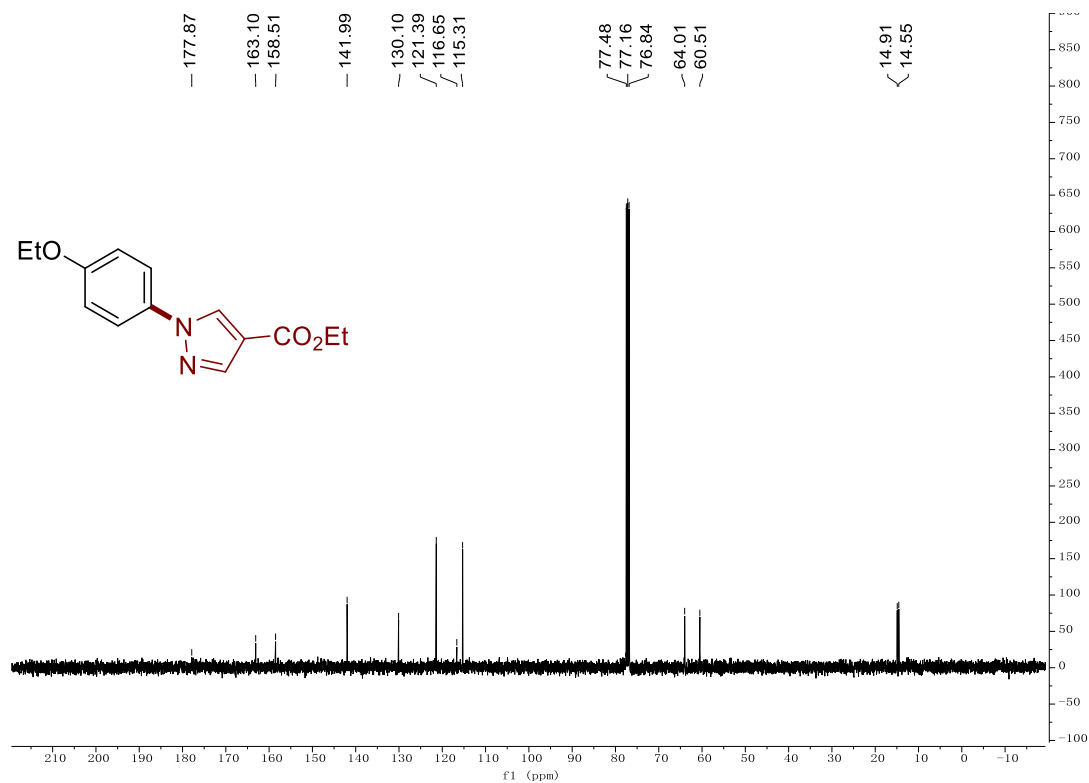

### <sup>1</sup>H NMR Spectrum of 3s (400 MHz, CDCl<sub>3</sub>)

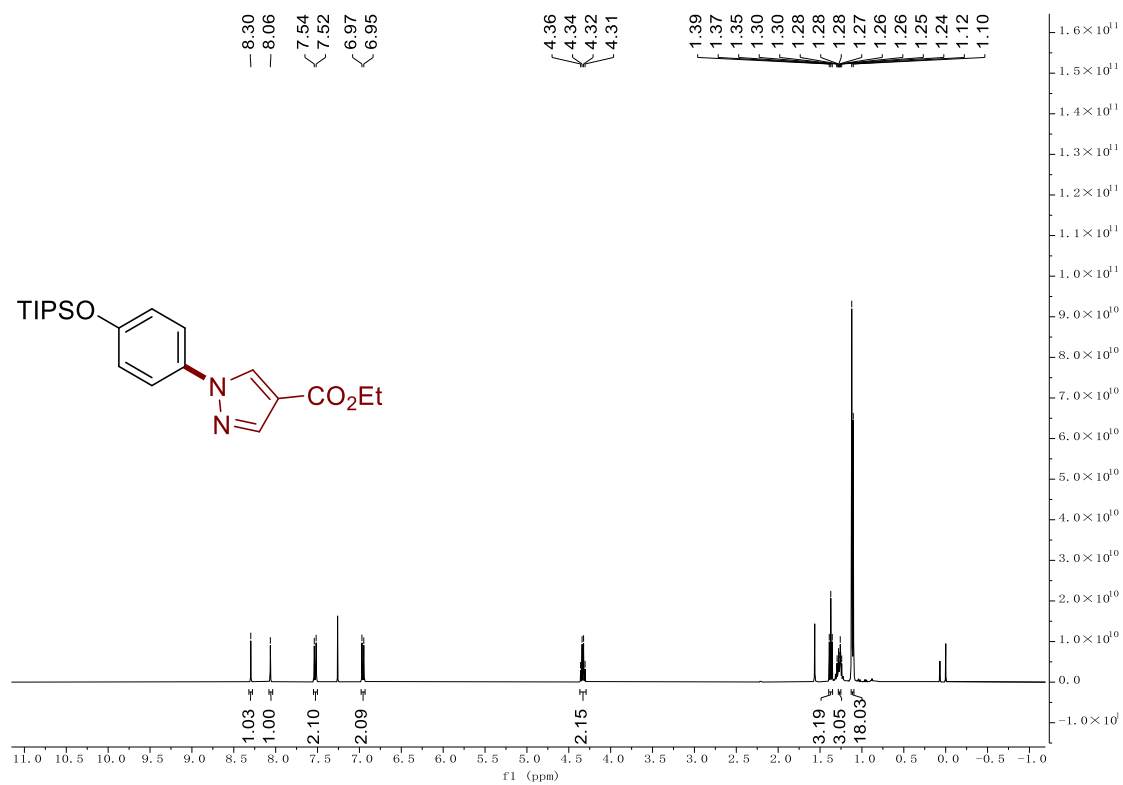

### <sup>13</sup>C NMR Spectrum of 3s (400 MHz, CDCl<sub>3</sub>)

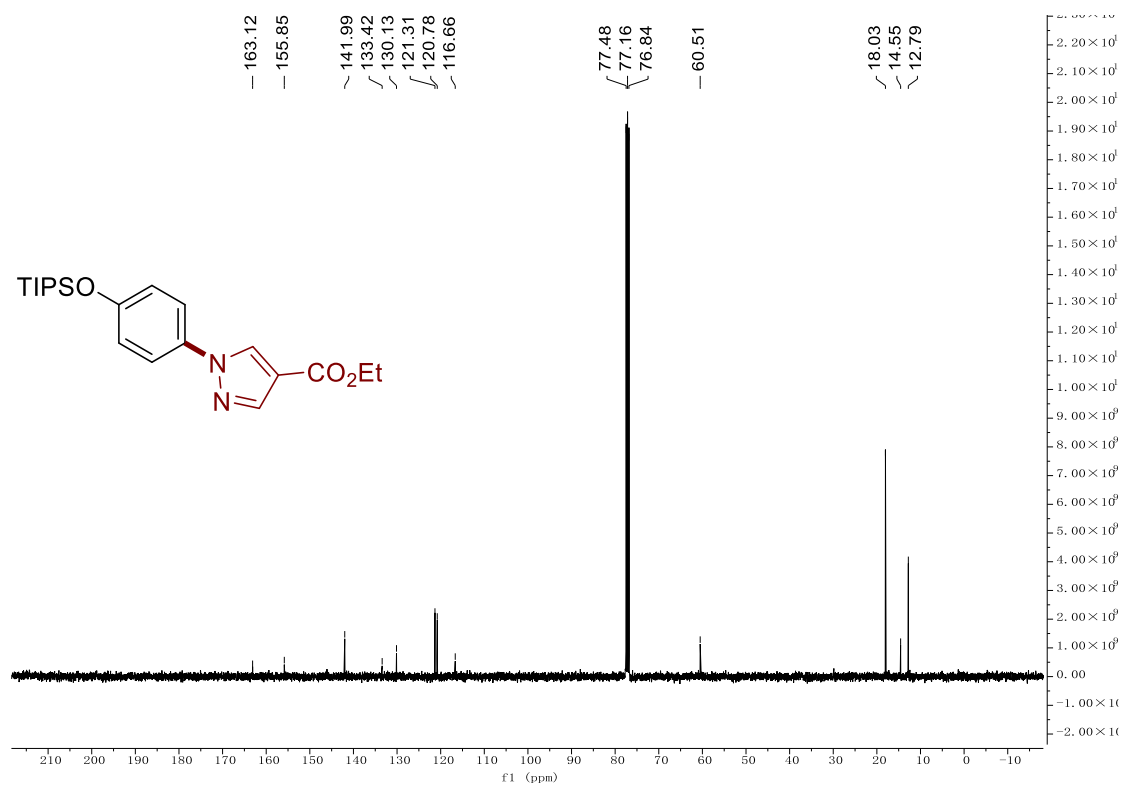

### <sup>1</sup>H NMR Spectrum of 3t (400 MHz, CDCl<sub>3</sub>)

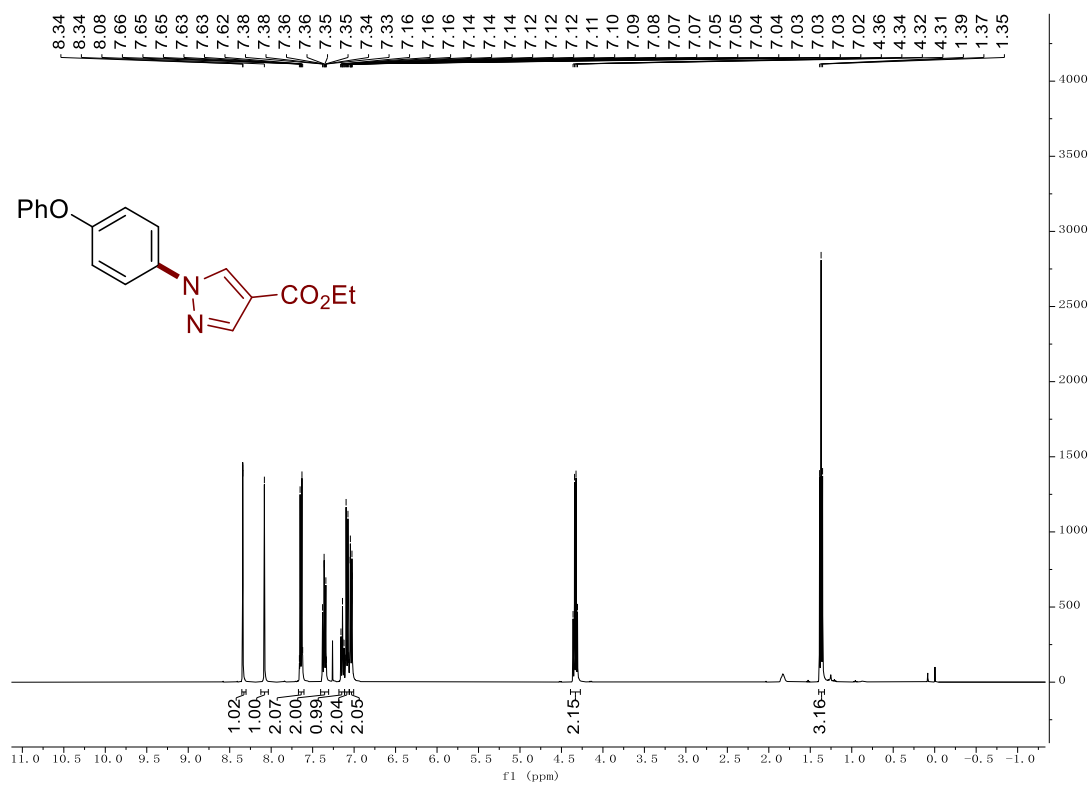



### <sup>13</sup>C NMR Spectrum of 3t (400 MHz, CDCl<sub>3</sub>)

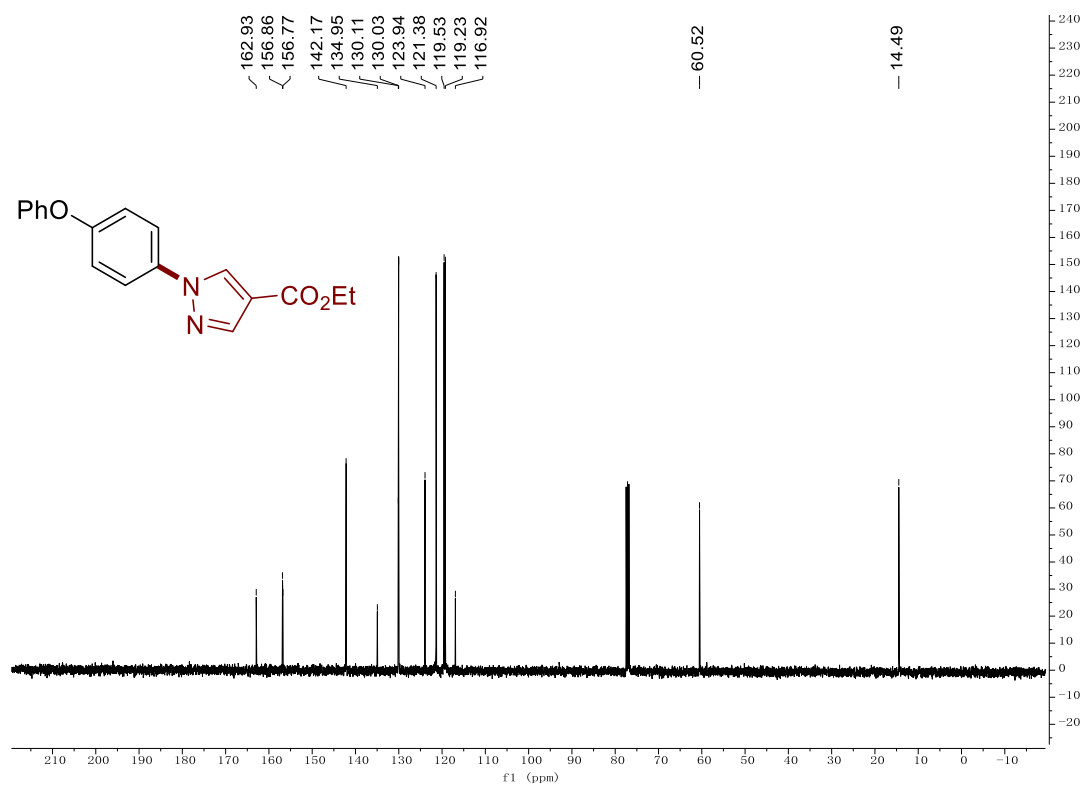

### <sup>1</sup>H NMR Spectrum of 3u (400 MHz, CDCl<sub>3</sub>)

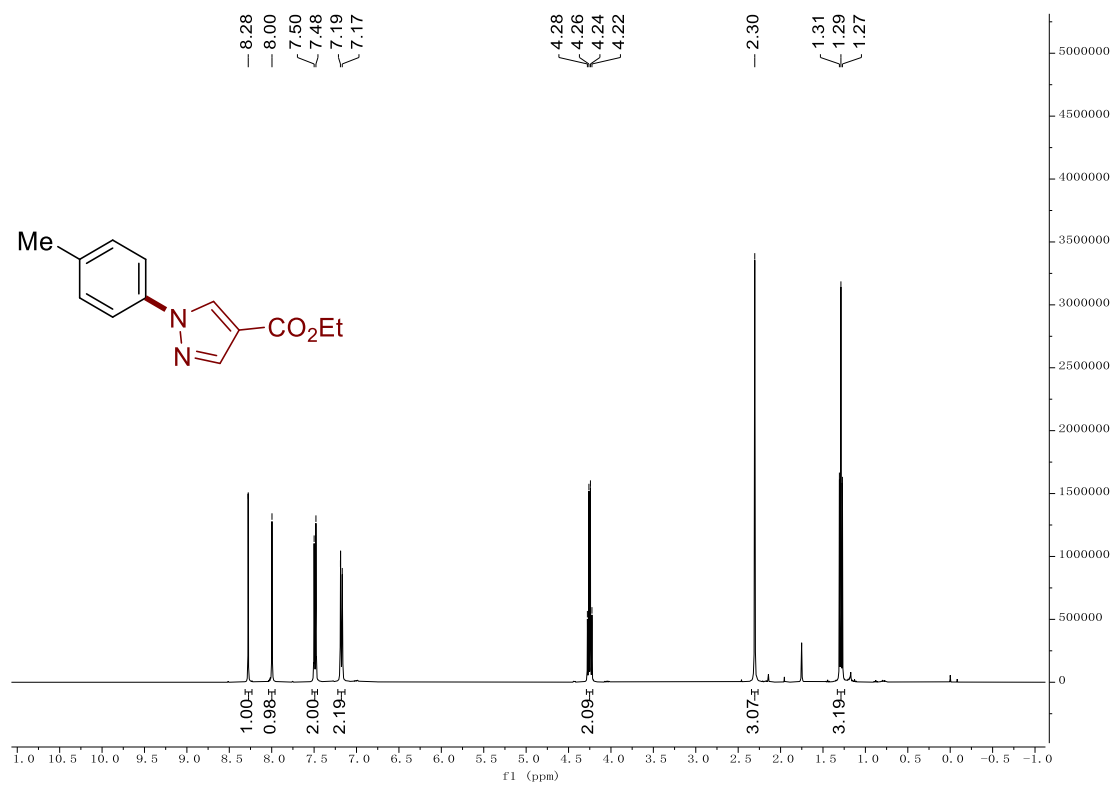

### <sup>13</sup>C NMR Spectrum of 3u (400 MHz, CDCl<sub>3</sub>)

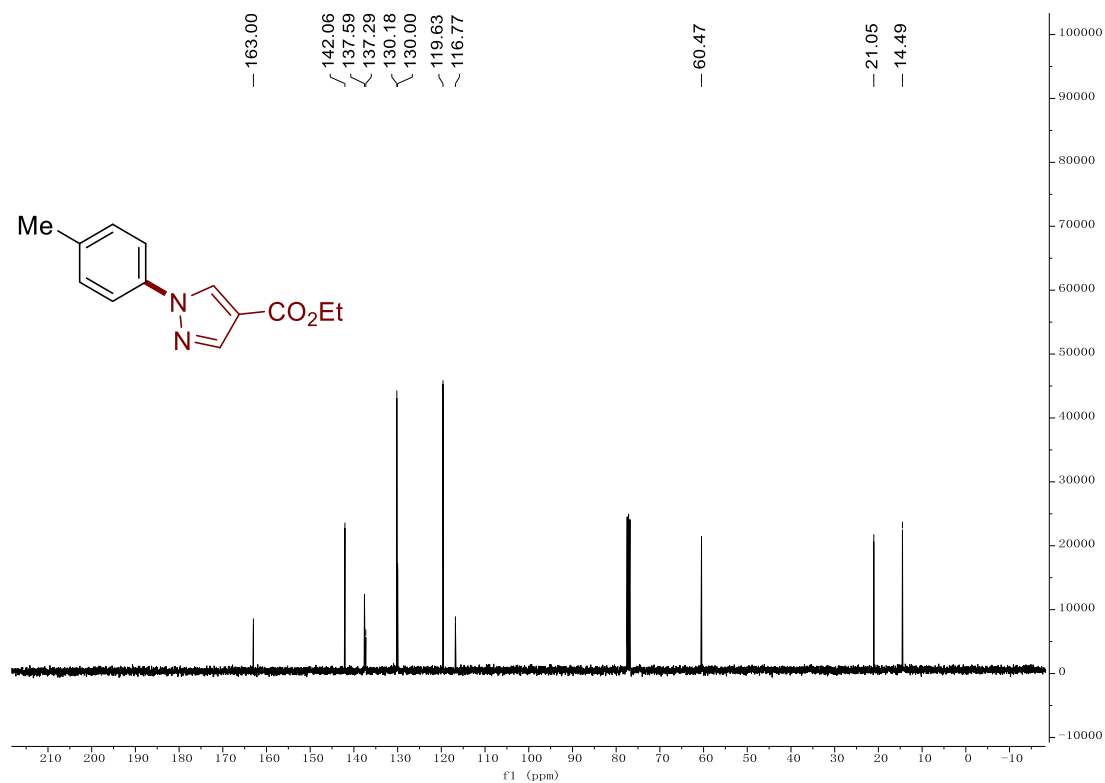

### <sup>1</sup>H NMR Spectrum of 3v (400 MHz, CDCl<sub>3</sub>)

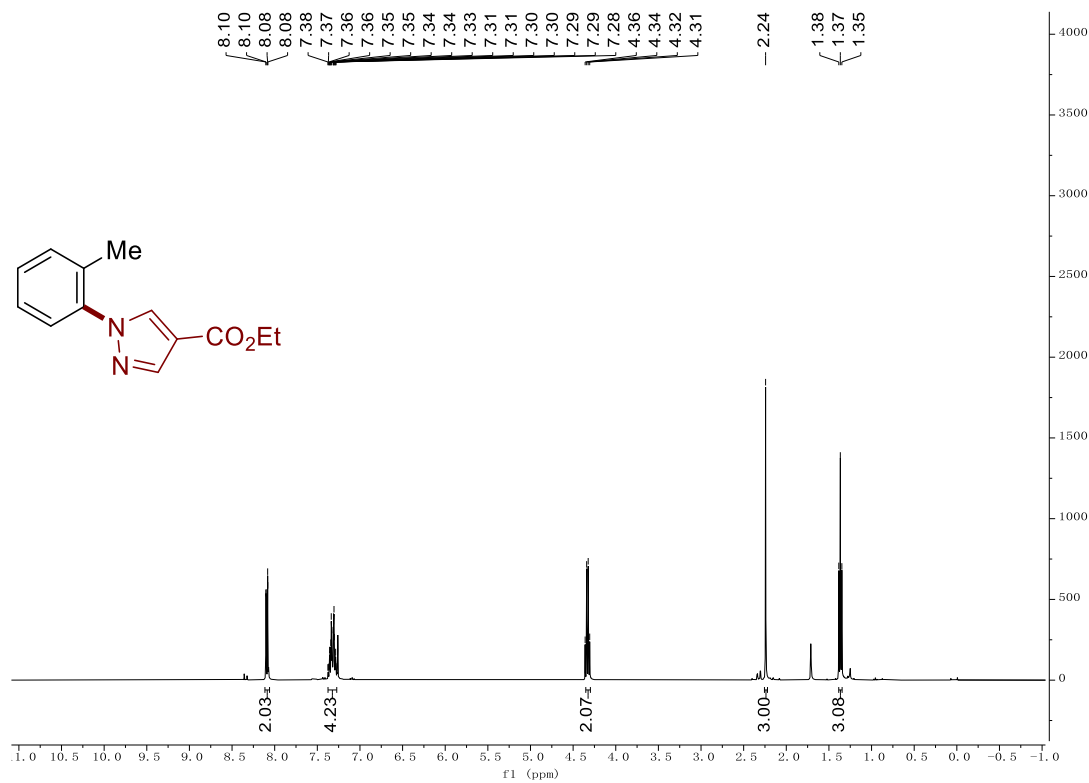

### <sup>13</sup>C NMR Spectrum of 3v (400 MHz, CDCl<sub>3</sub>)

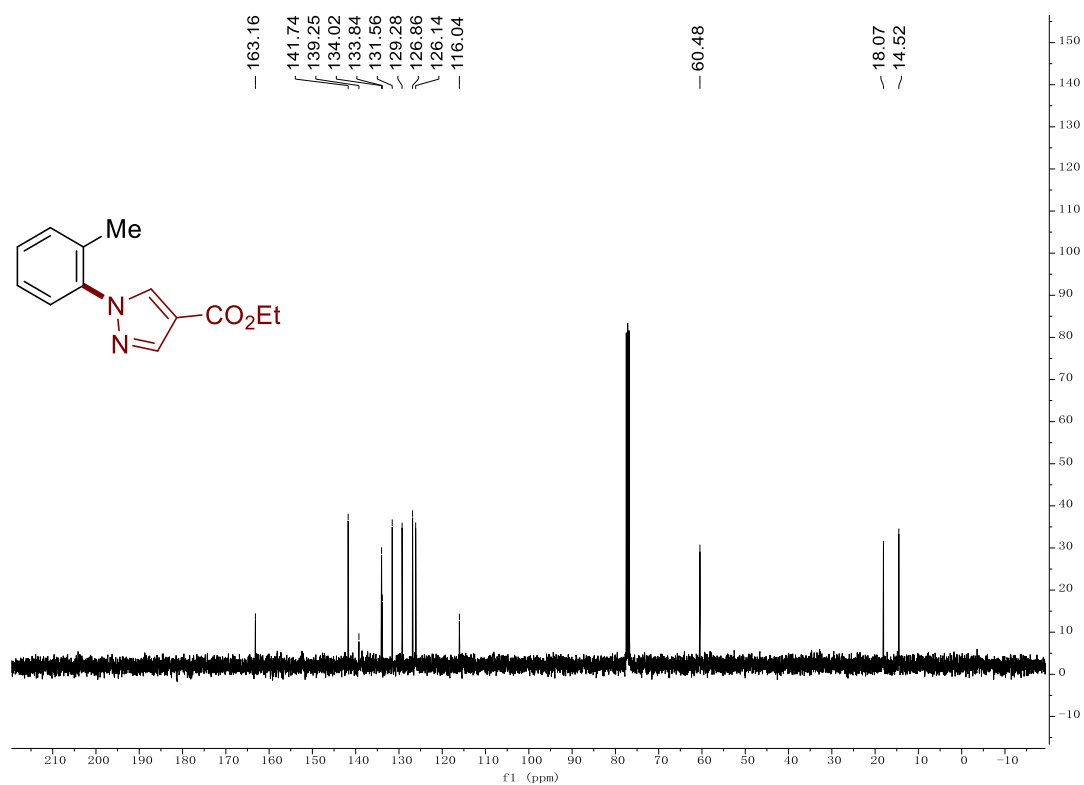

### <sup>1</sup>H NMR Spectrum of 3w (400 MHz, CDCl<sub>3</sub>)

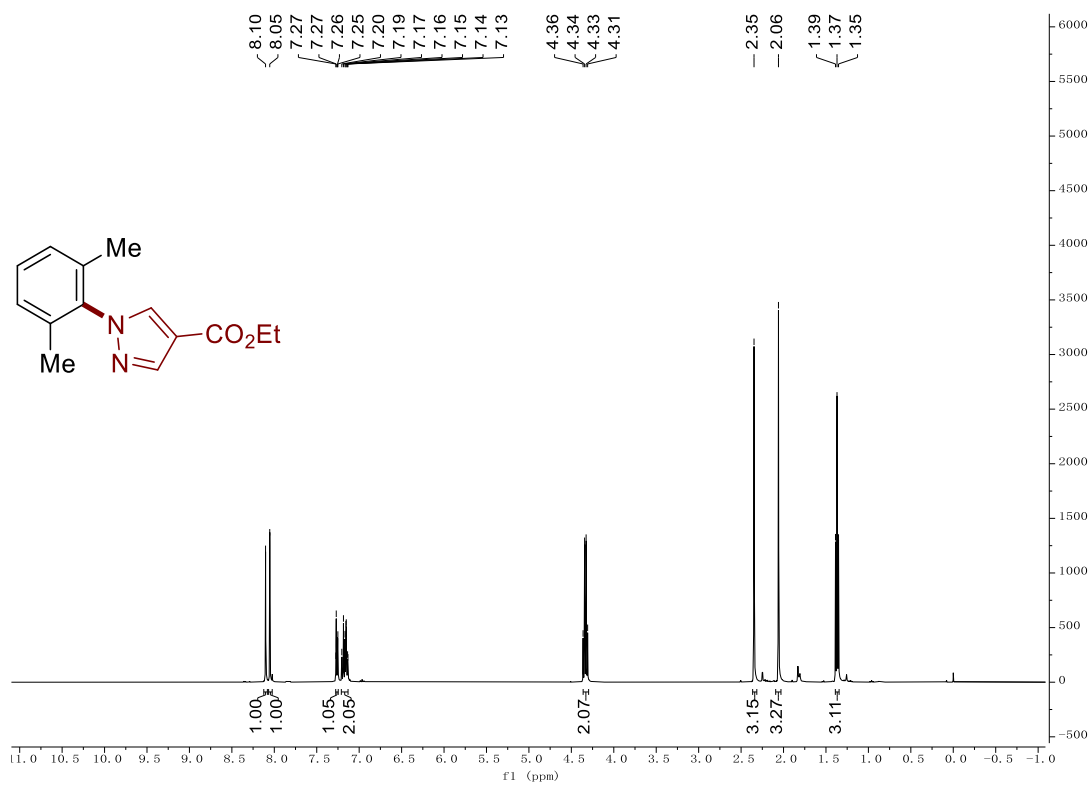

### <sup>13</sup>C NMR Spectrum of 3w (400 MHz, CDCl<sub>3</sub>)

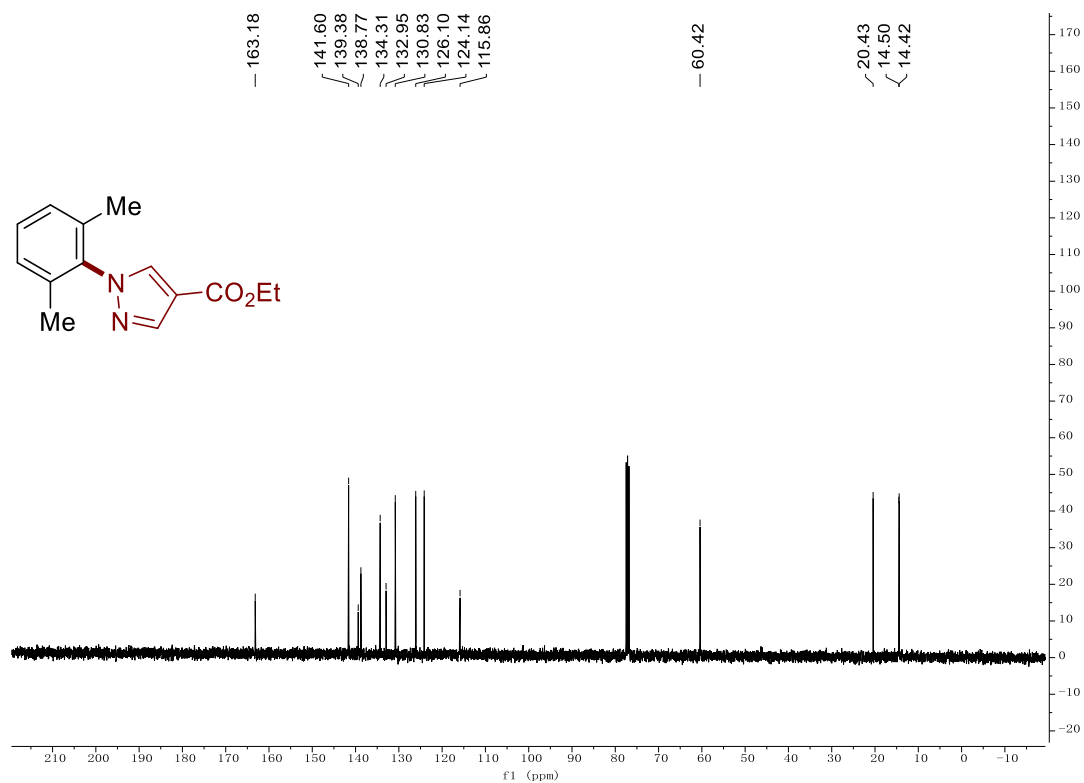

### <sup>1</sup>H NMR Spectrum of 3x (400 MHz, CDCl<sub>3</sub>)

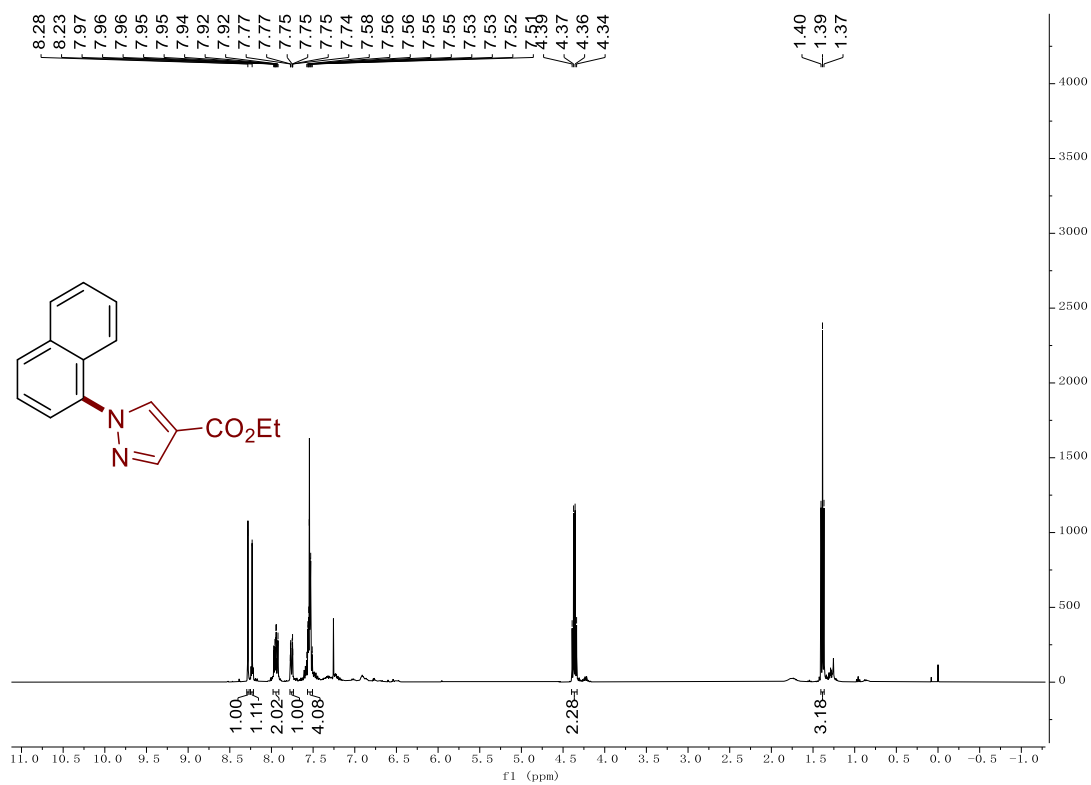

### <sup>13</sup>C NMR Spectrum of 3x (400 MHz, CDCl<sub>3</sub>)

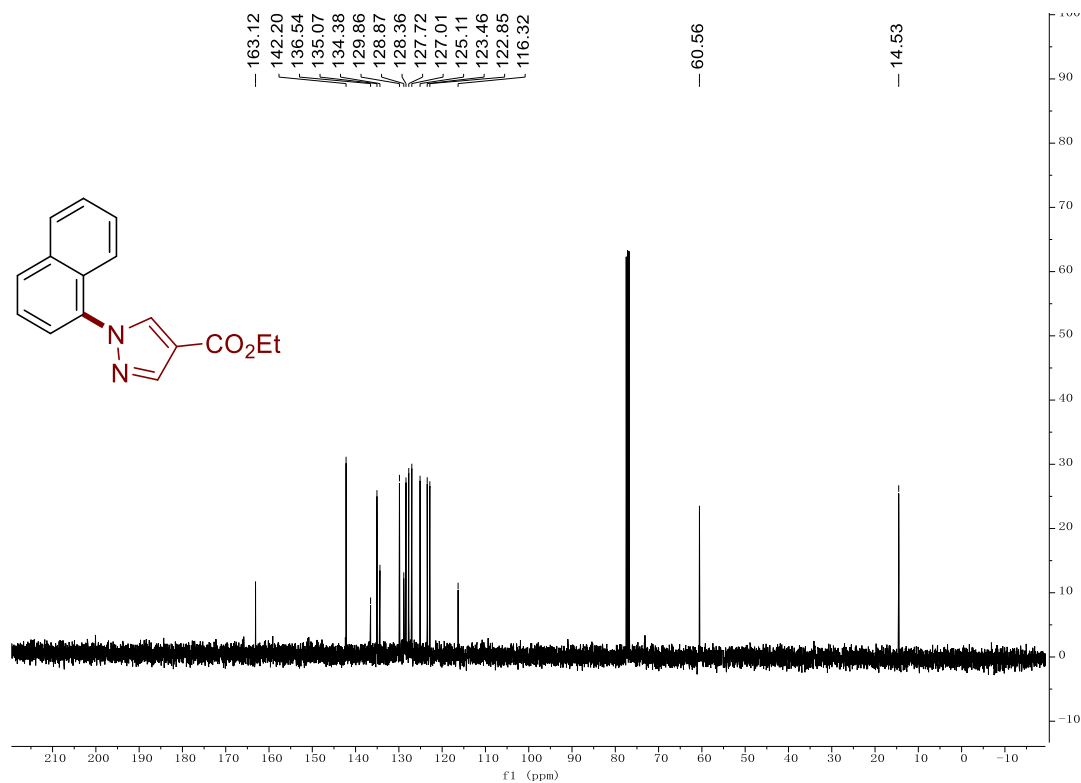

### <sup>1</sup>H NMR Spectrum of 3y (400 MHz, CDCl<sub>3</sub>)

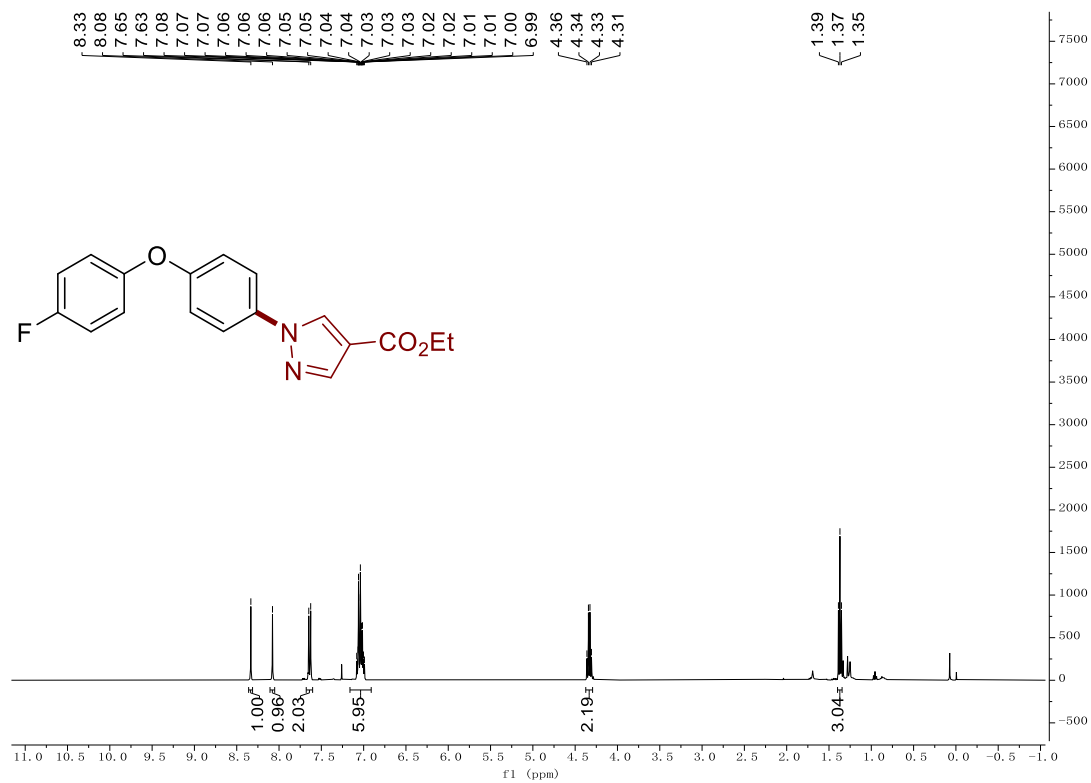

### <sup>13</sup>C NMR Spectrum of 3y (400 MHz, CDCl<sub>3</sub>)

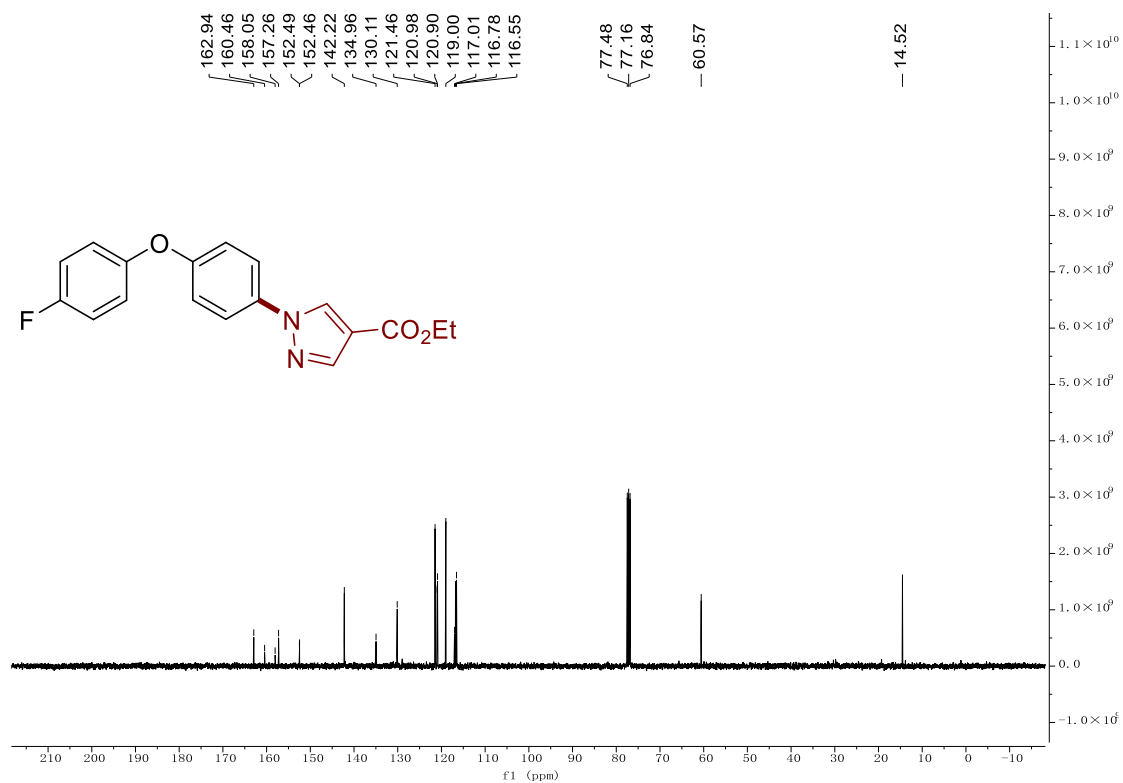

### <sup>19</sup>F NMR Spectrum of 3y (400 MHz, CDCl<sub>3</sub>)

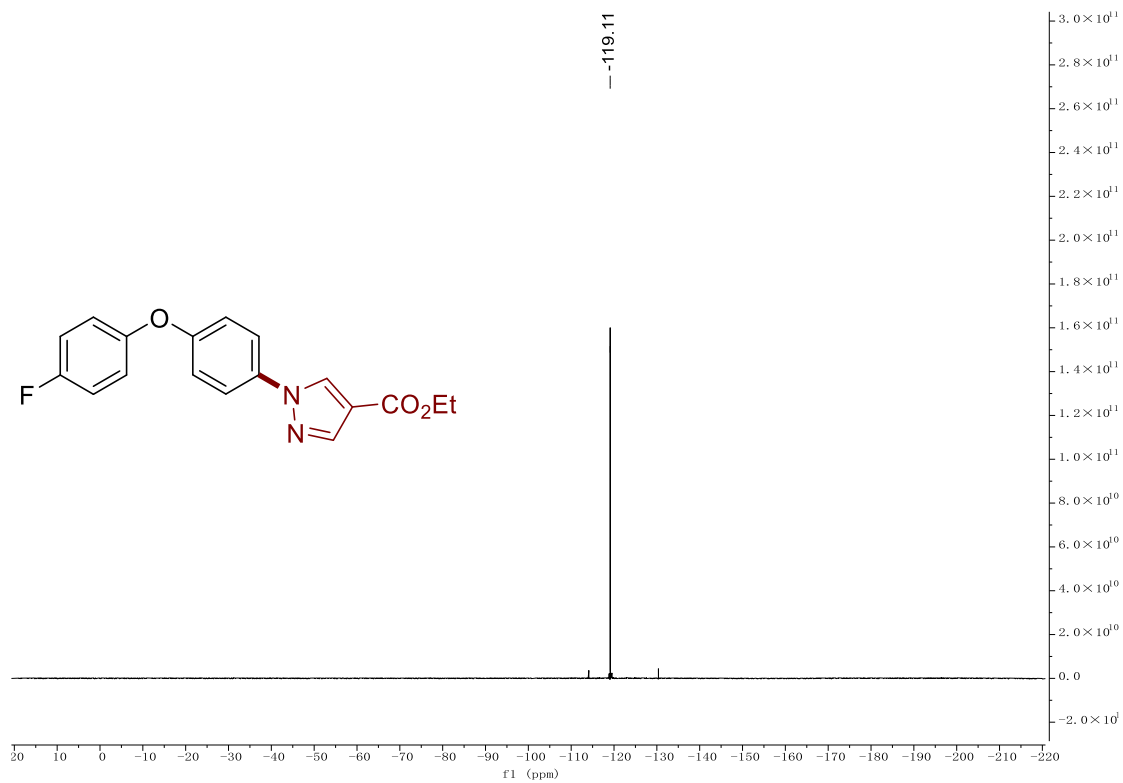

### <sup>1</sup>H NMR Spectrum of 3z (400 MHz, CDCl<sub>3</sub>)

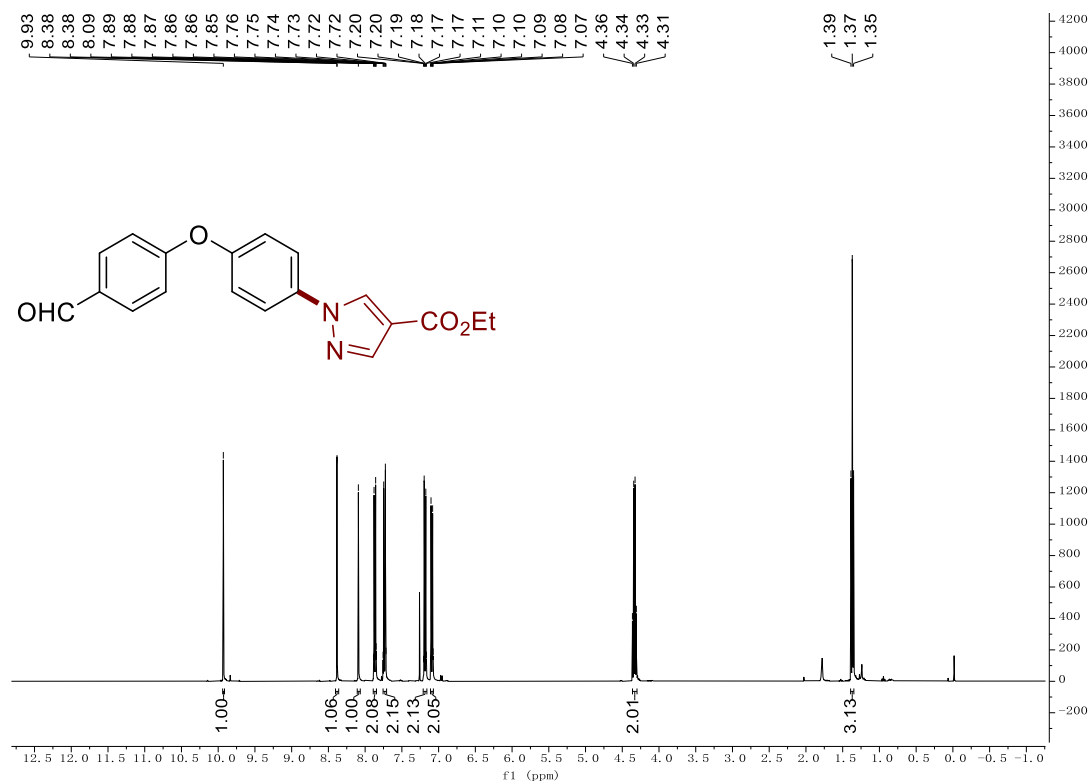

### <sup>13</sup>C NMR Spectrum of 3z (400 MHz, CDCl<sub>3</sub>)

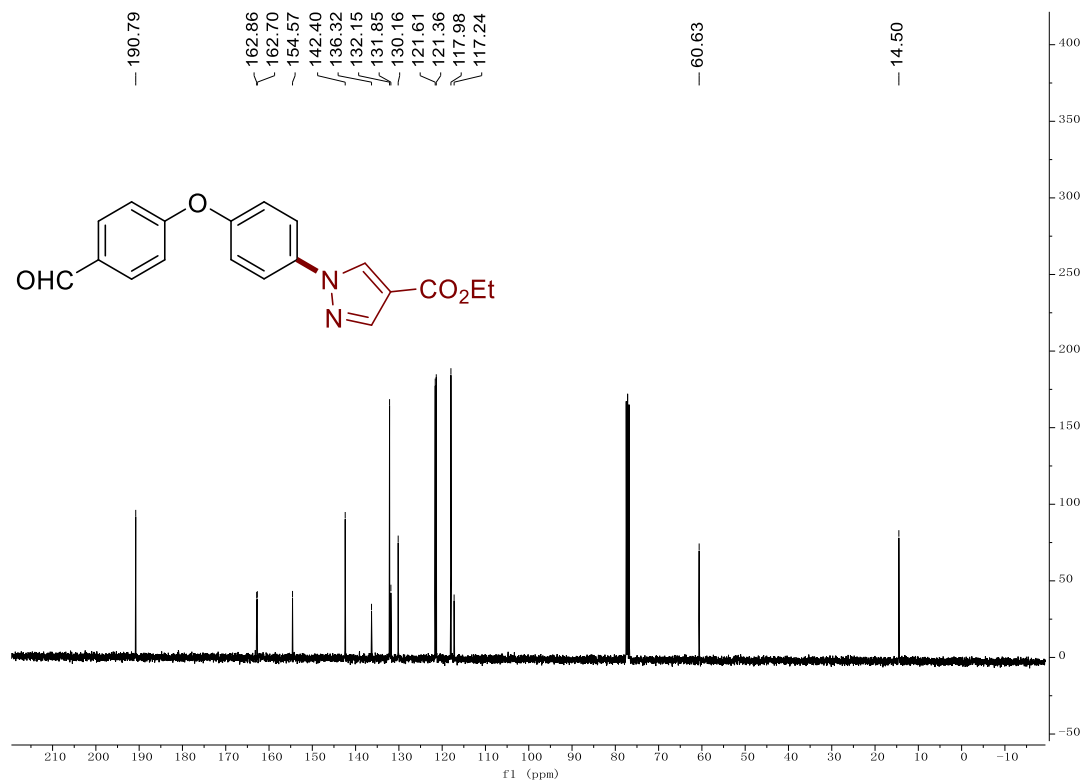

### <sup>1</sup>H NMR Spectrum of 4a (400 MHz, CDCl<sub>3</sub>)

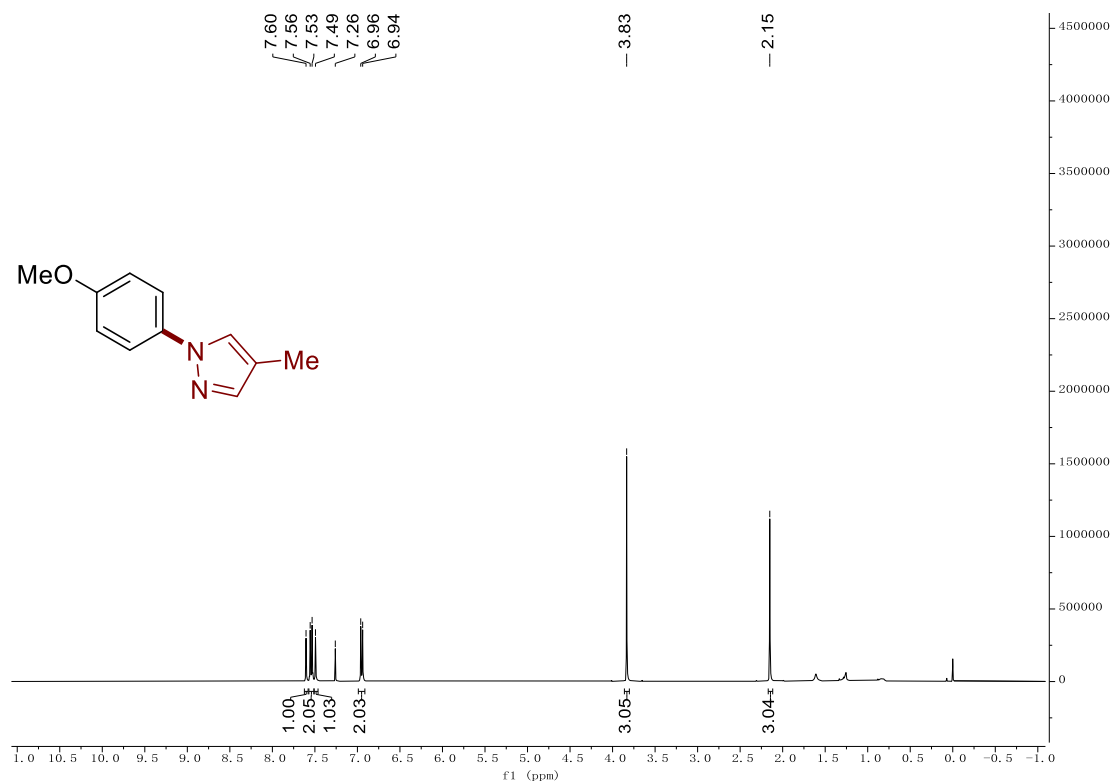

### <sup>13</sup>C NMR Spectrum of 4a (400 MHz, CDCl<sub>3</sub>)

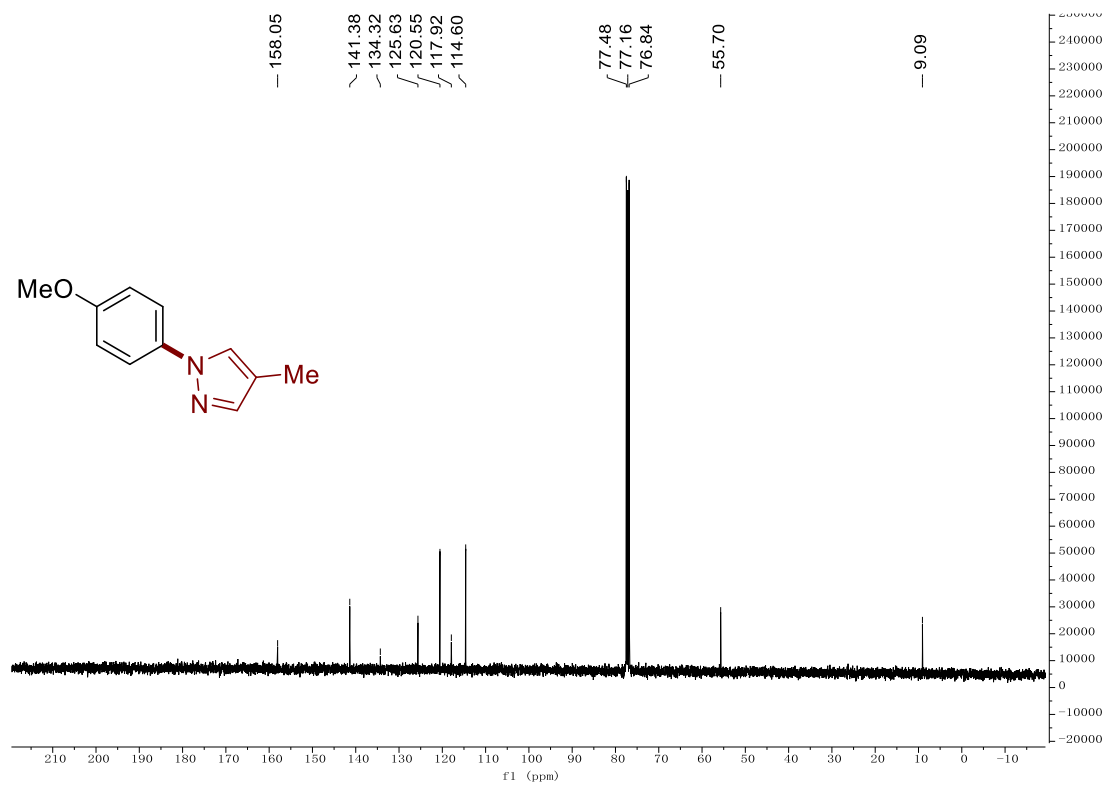



### <sup>1</sup>H NMR Spectrum of 4b (400 MHz, CDCl<sub>3</sub>)

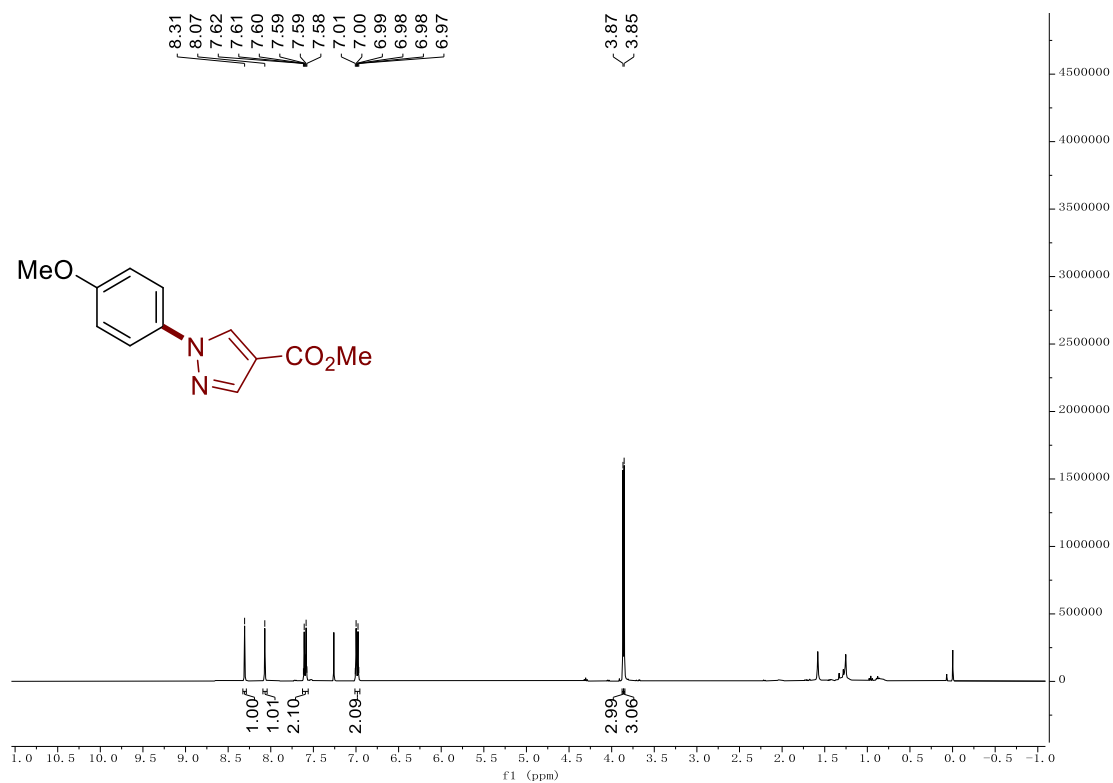

### <sup>13</sup>C NMR Spectrum of 4b (400 MHz, CDCl<sub>3</sub>)

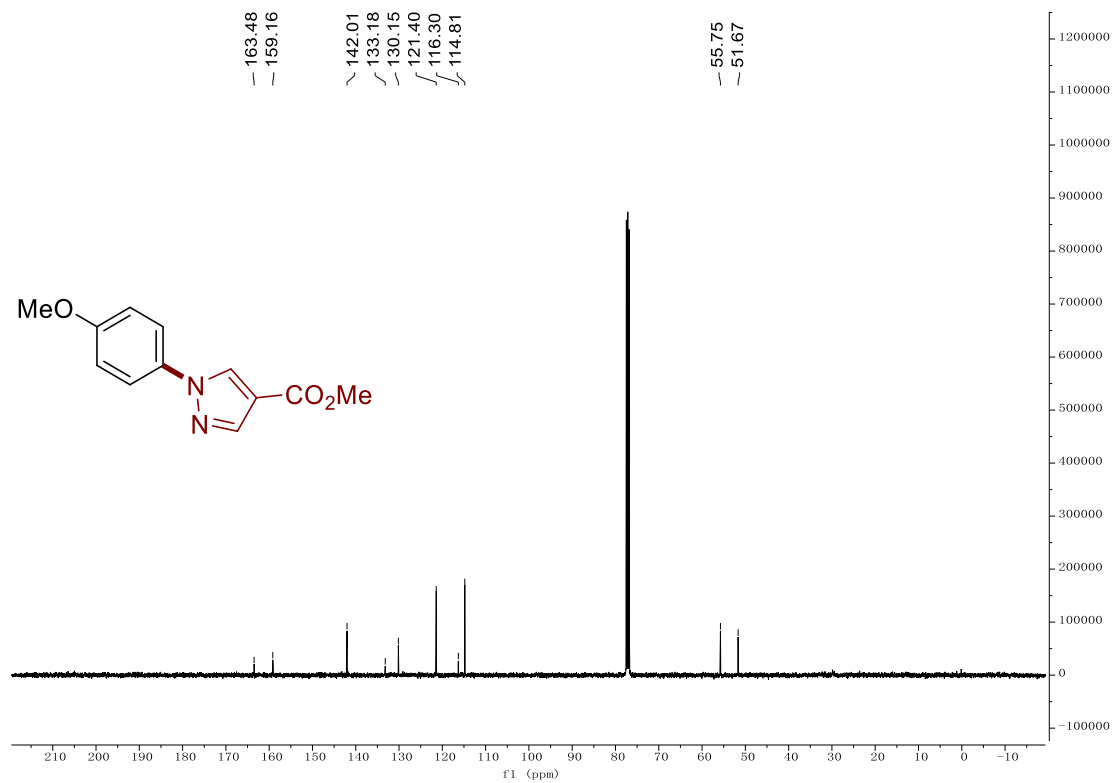

### <sup>1</sup>H NMR Spectrum of 4c (400 MHz, CDCl<sub>3</sub>)

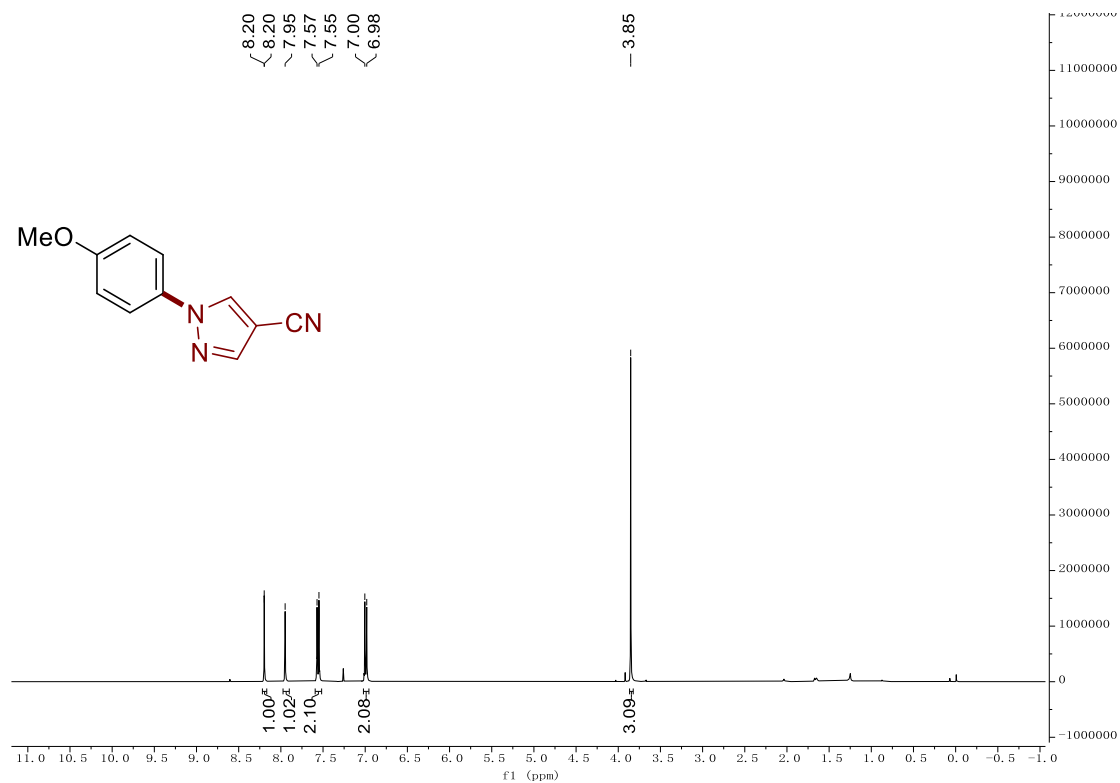

### <sup>13</sup>C NMR Spectrum of 4c (400 MHz, CDCl<sub>3</sub>)

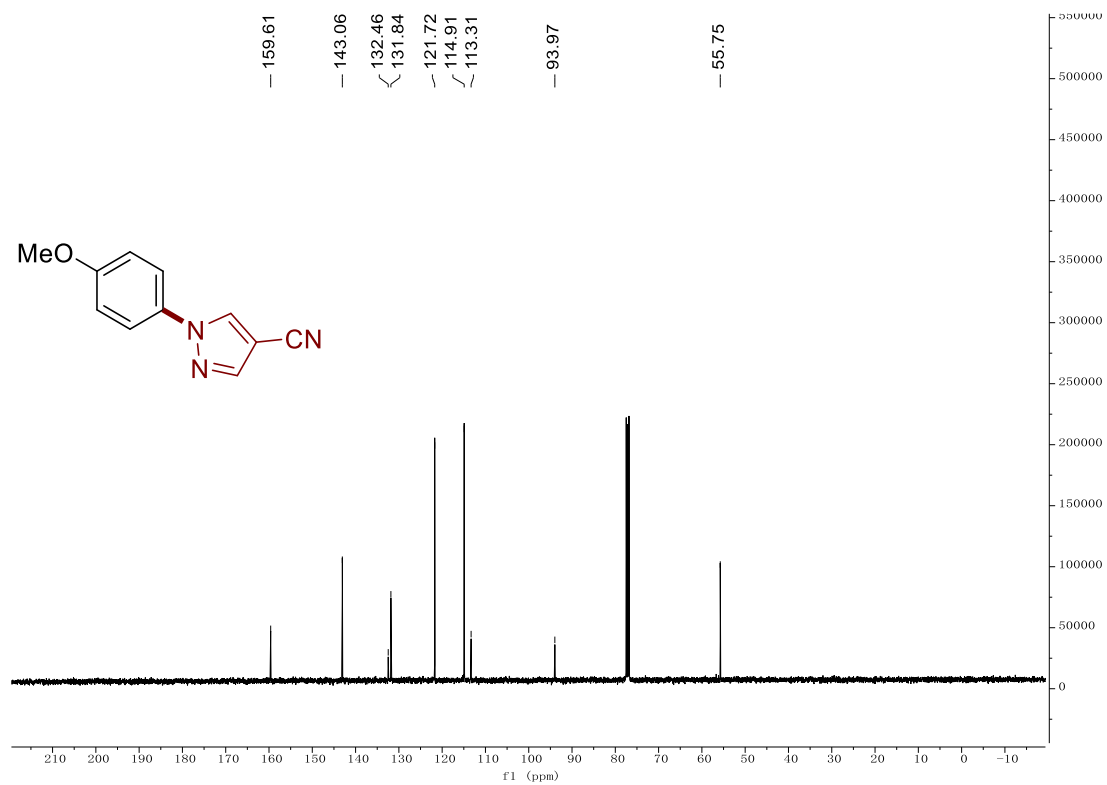

### <sup>1</sup>H NMR Spectrum of 4d (400 MHz, CDCl<sub>3</sub>)

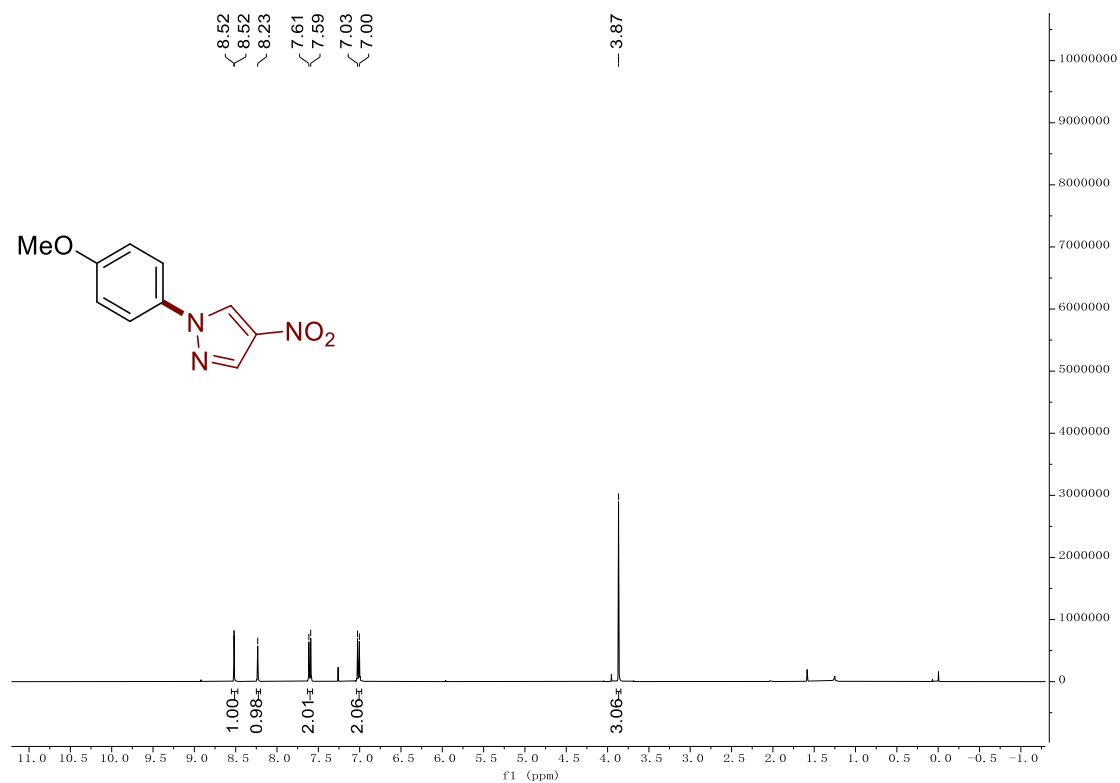

### <sup>13</sup>C NMR Spectrum of 4d (400 MHz, CDCl<sub>3</sub>)

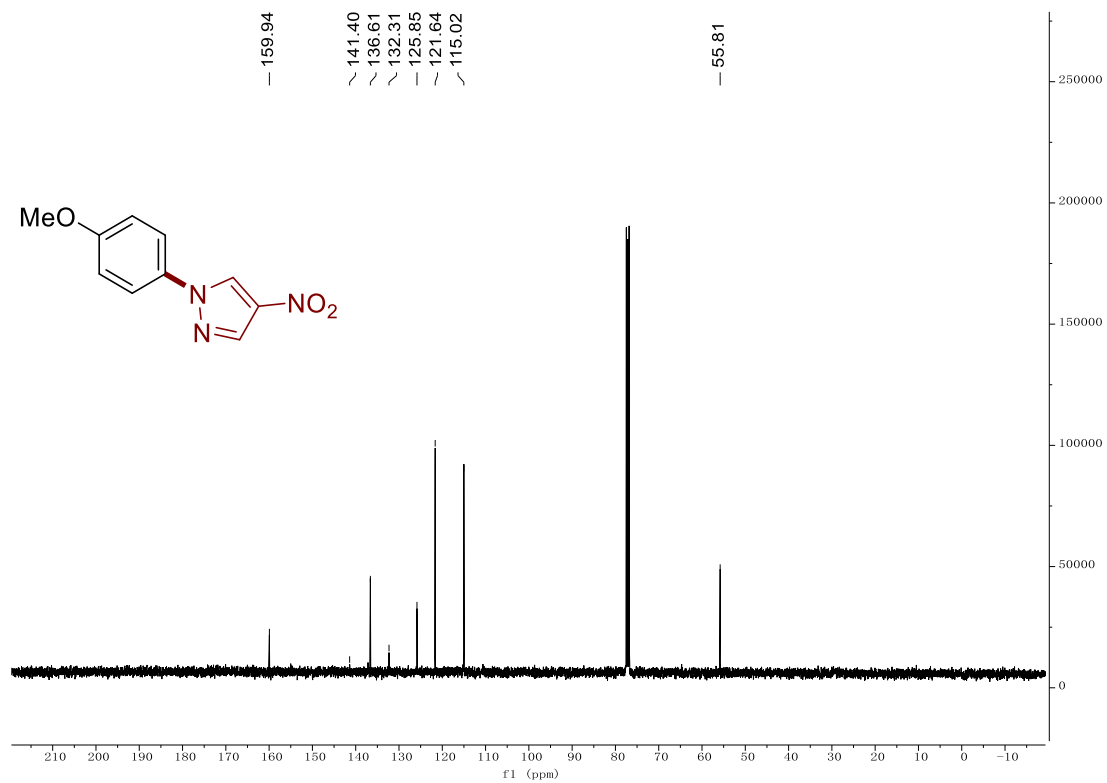

### <sup>1</sup>H NMR Spectrum of 4e (400 MHz, CDCl<sub>3</sub>)

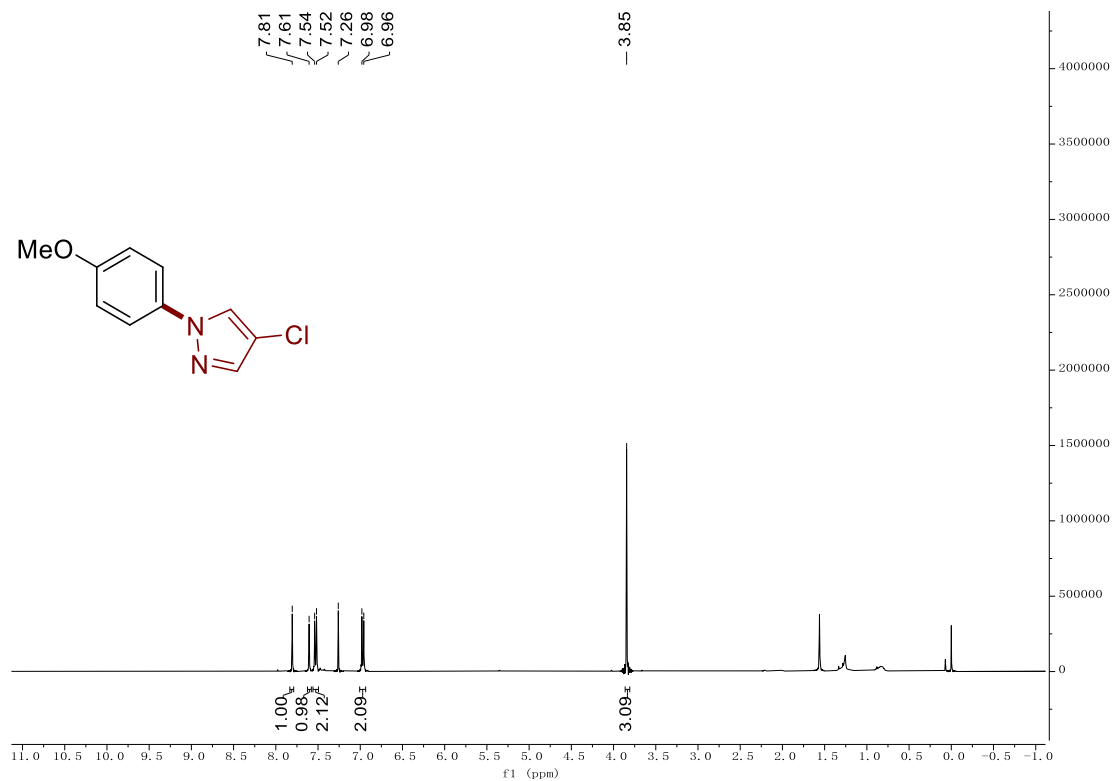

### <sup>13</sup>C NMR Spectrum of 4e (400 MHz, CDCl<sub>3</sub>)

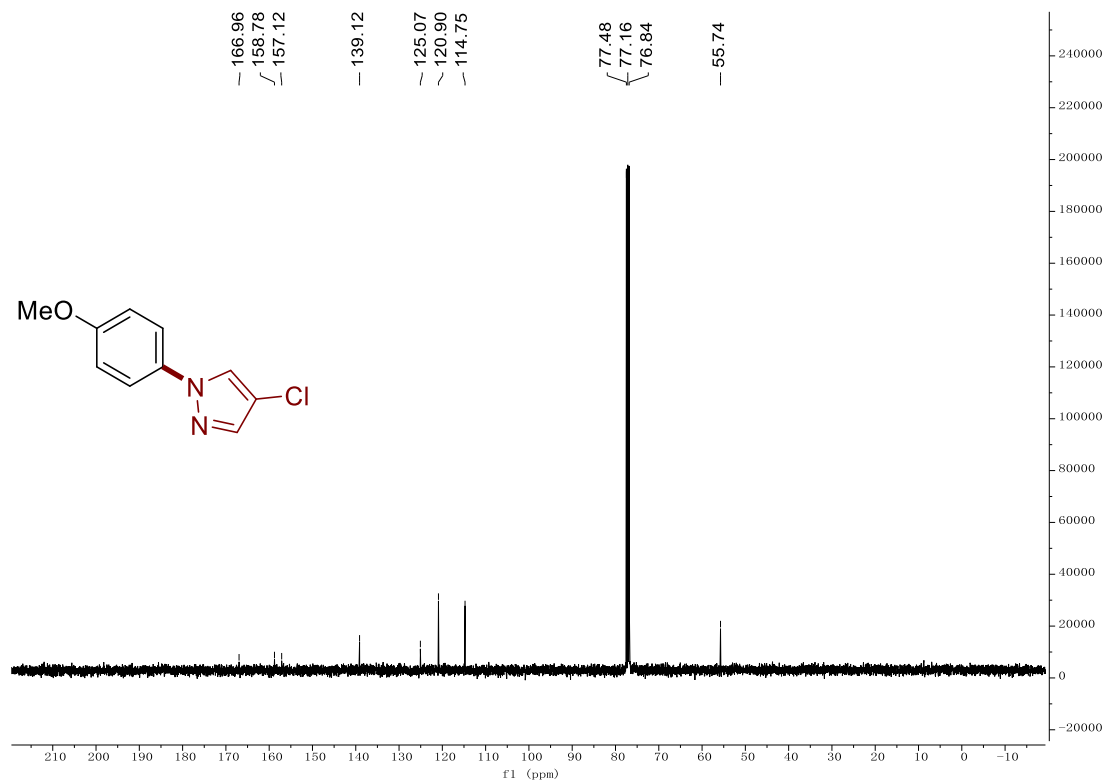

### <sup>1</sup>H NMR Spectrum of 4f (400 MHz, CDCl<sub>3</sub>)

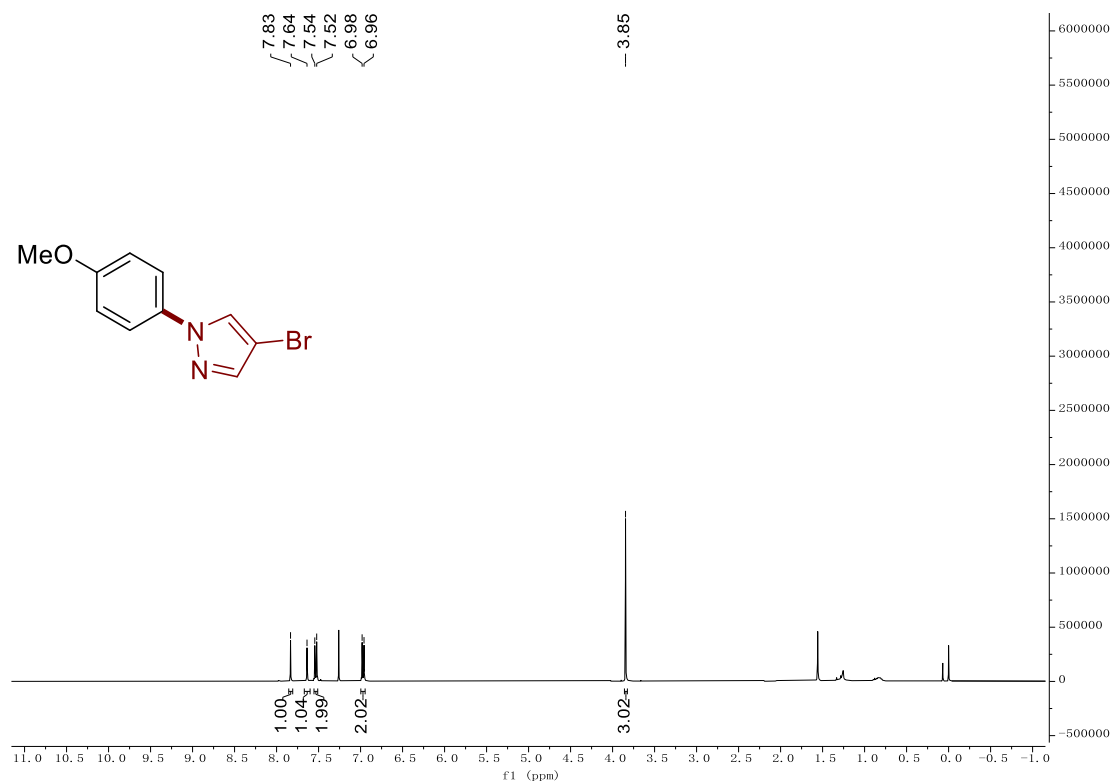

### <sup>13</sup>C NMR Spectrum of 4f (400 MHz, CDCl<sub>3</sub>)

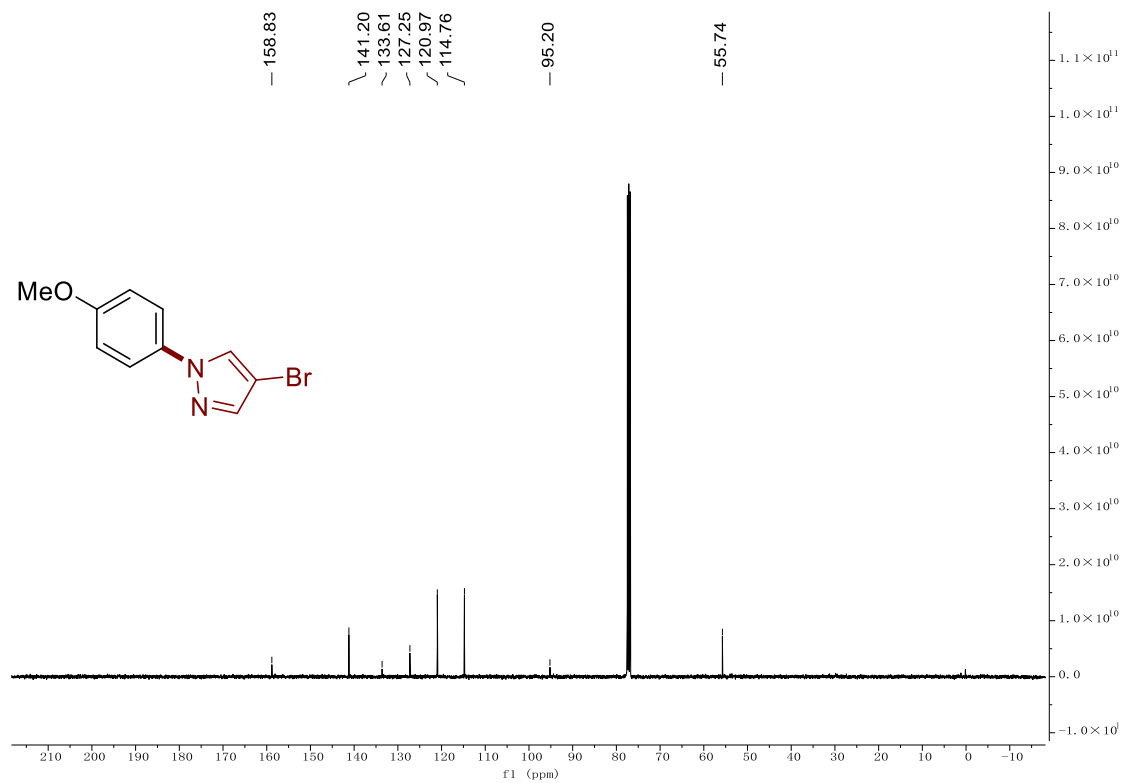

### <sup>1</sup>H NMR Spectrum of 4g (400 MHz, CDCl<sub>3</sub>)

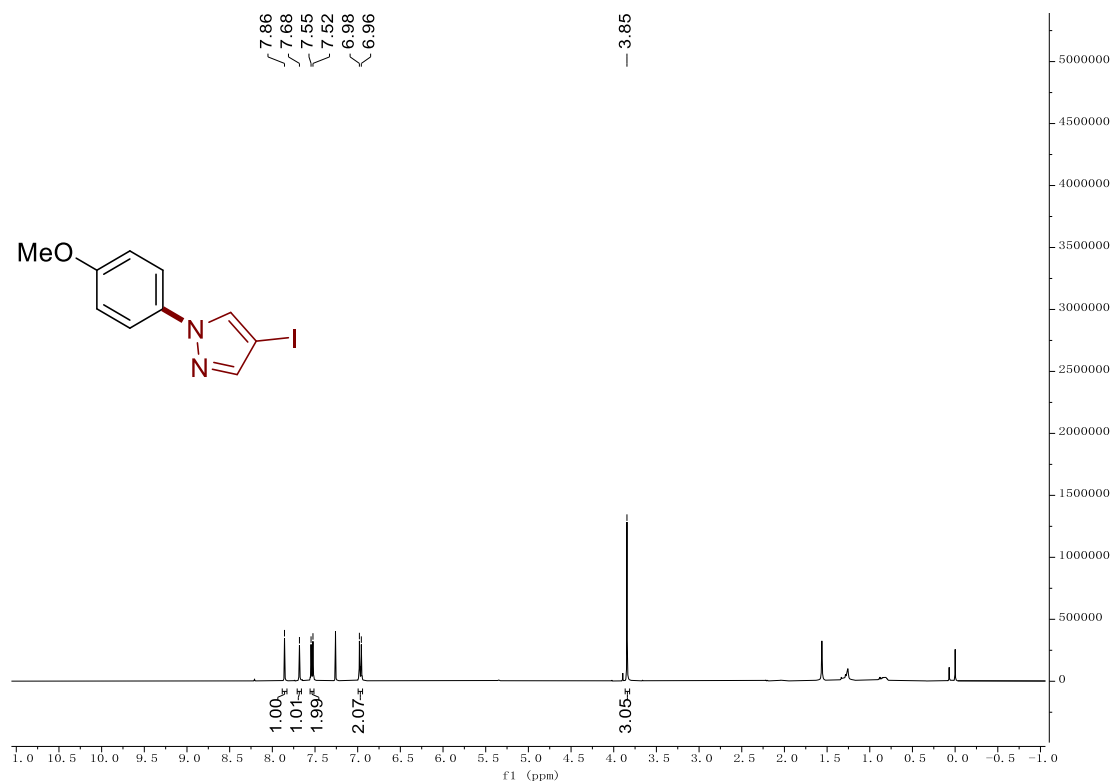

### <sup>13</sup>C NMR Spectrum of 4g (400 MHz, CDCl<sub>3</sub>)

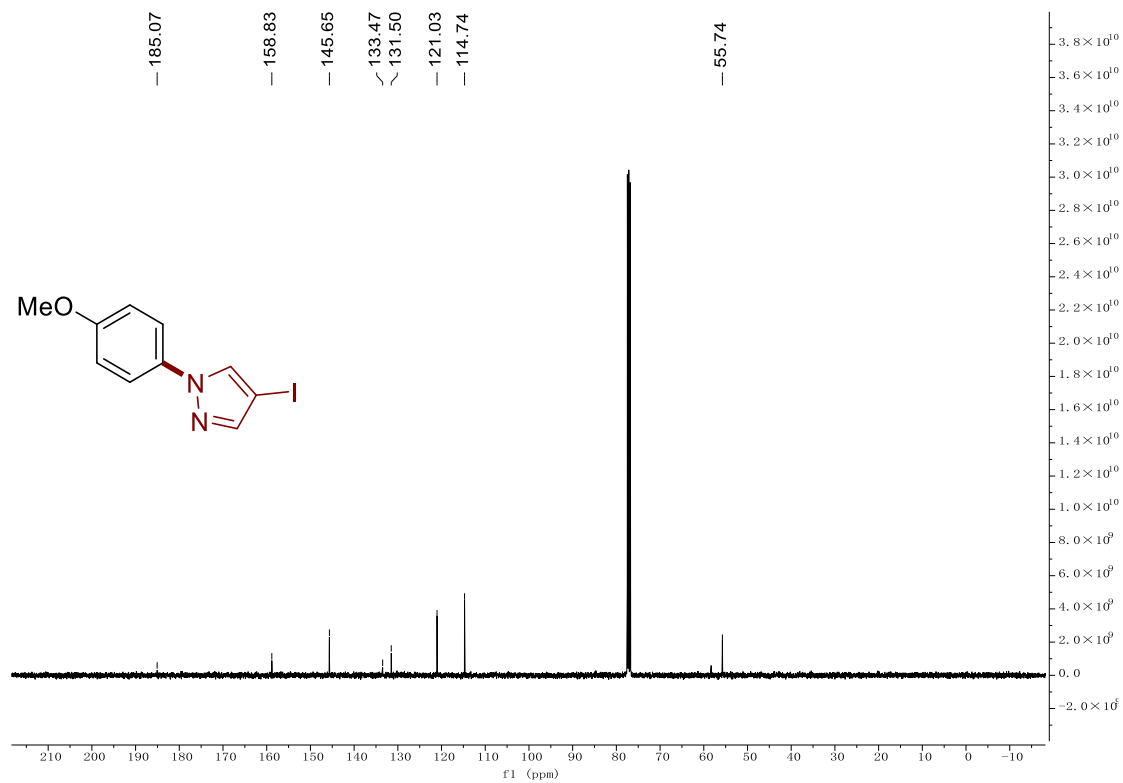

### <sup>1</sup>H NMR Spectrum of 4h (400 MHz, CDCl<sub>3</sub>)

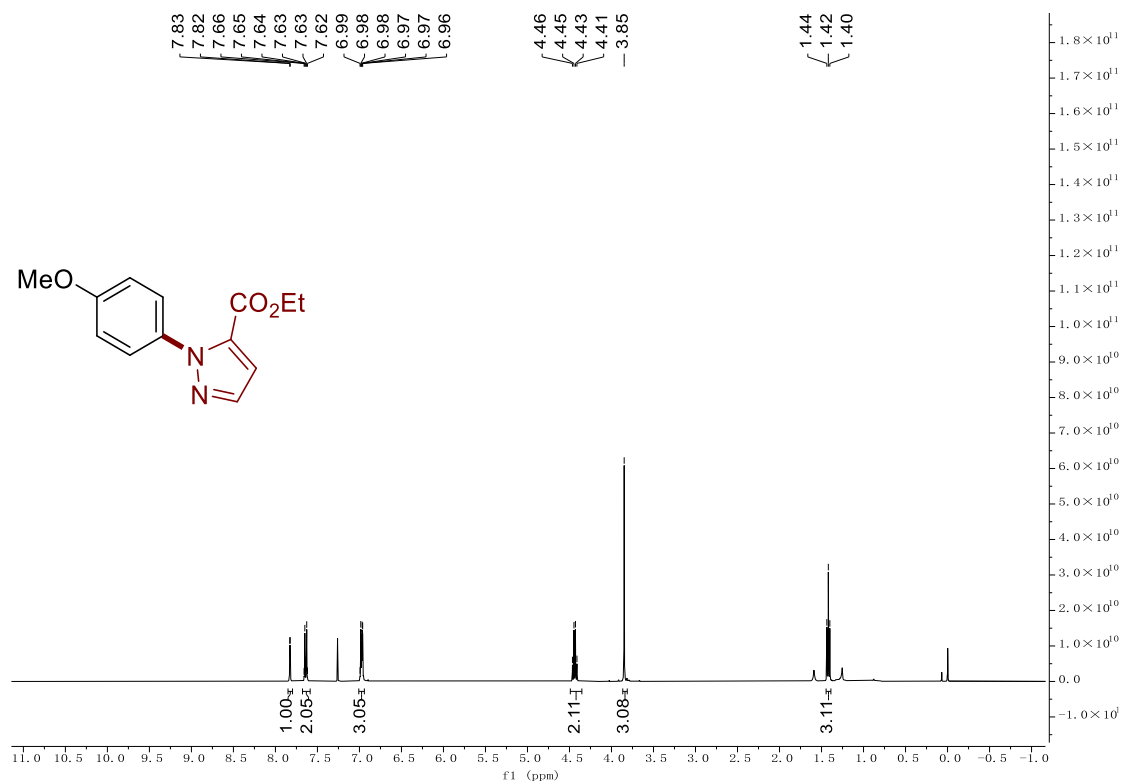

### <sup>13</sup>C NMR Spectrum of 4h (400 MHz, CDCl<sub>3</sub>)

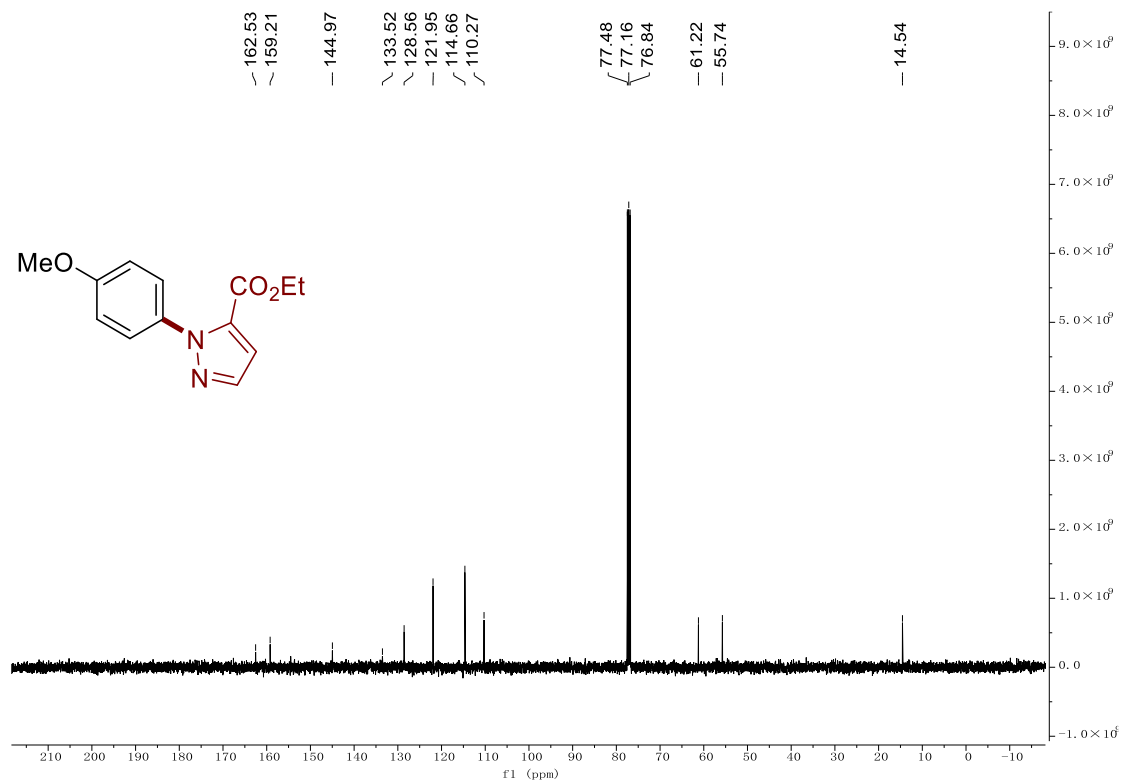

### <sup>1</sup>H NMR Spectrum of 4i (400 MHz, CDCl<sub>3</sub>)

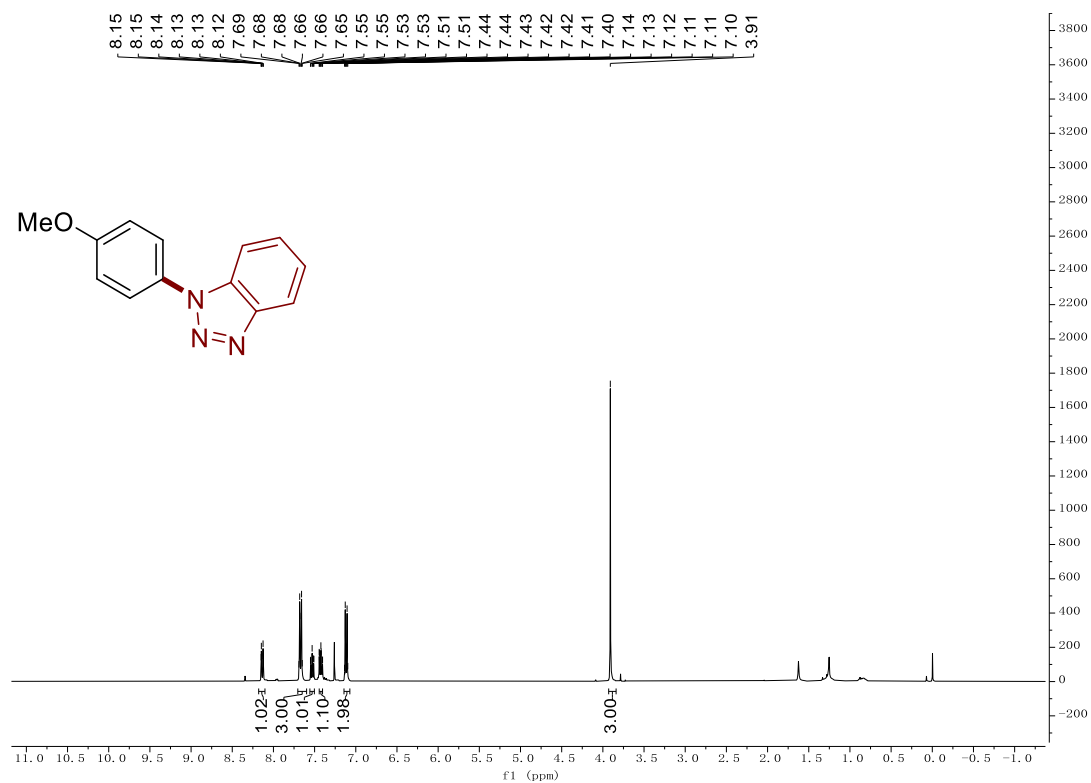

### <sup>13</sup>C NMR Spectrum of 4i (400 MHz, CDCl<sub>3</sub>)

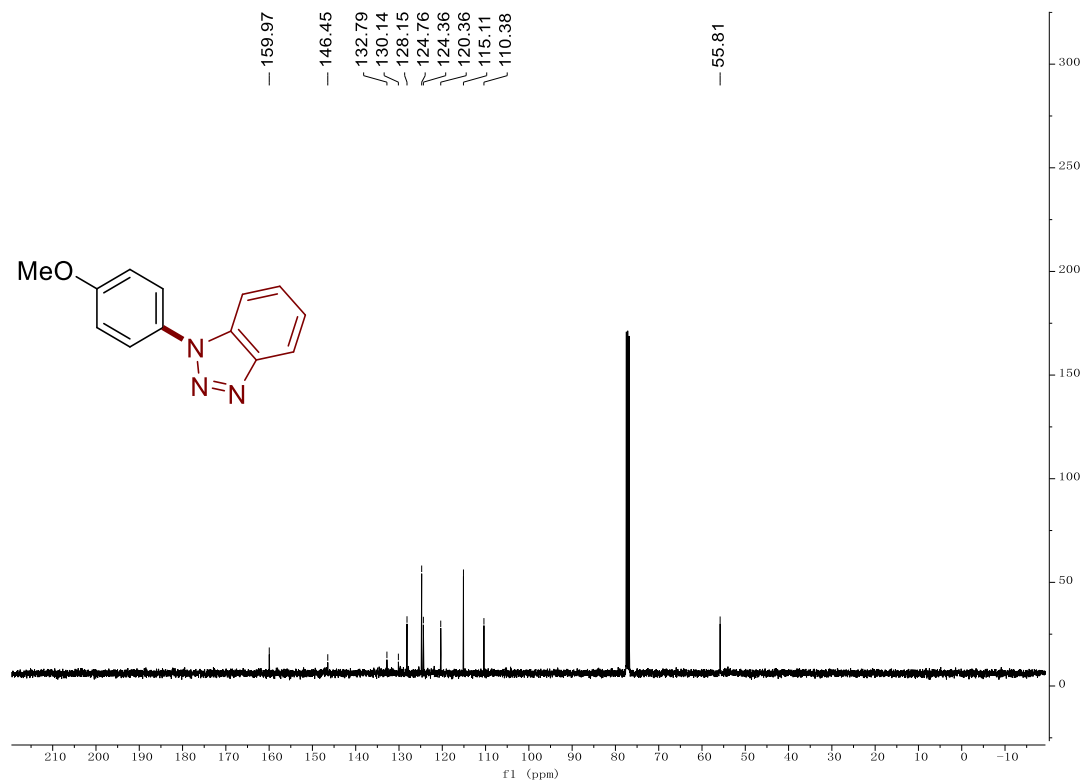



### <sup>1</sup>H NMR Spectrum of 4j (400 MHz, CDCl<sub>3</sub>)

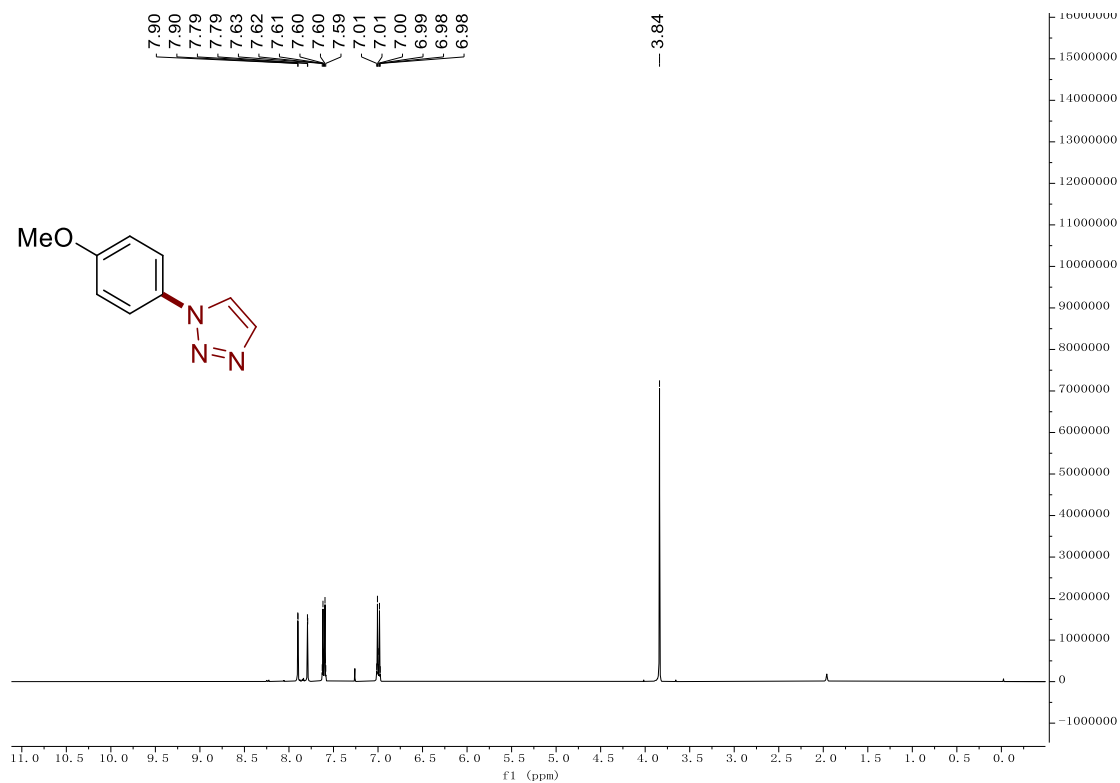

### <sup>13</sup>C NMR Spectrum of 4j (400 MHz, CDCl<sub>3</sub>)

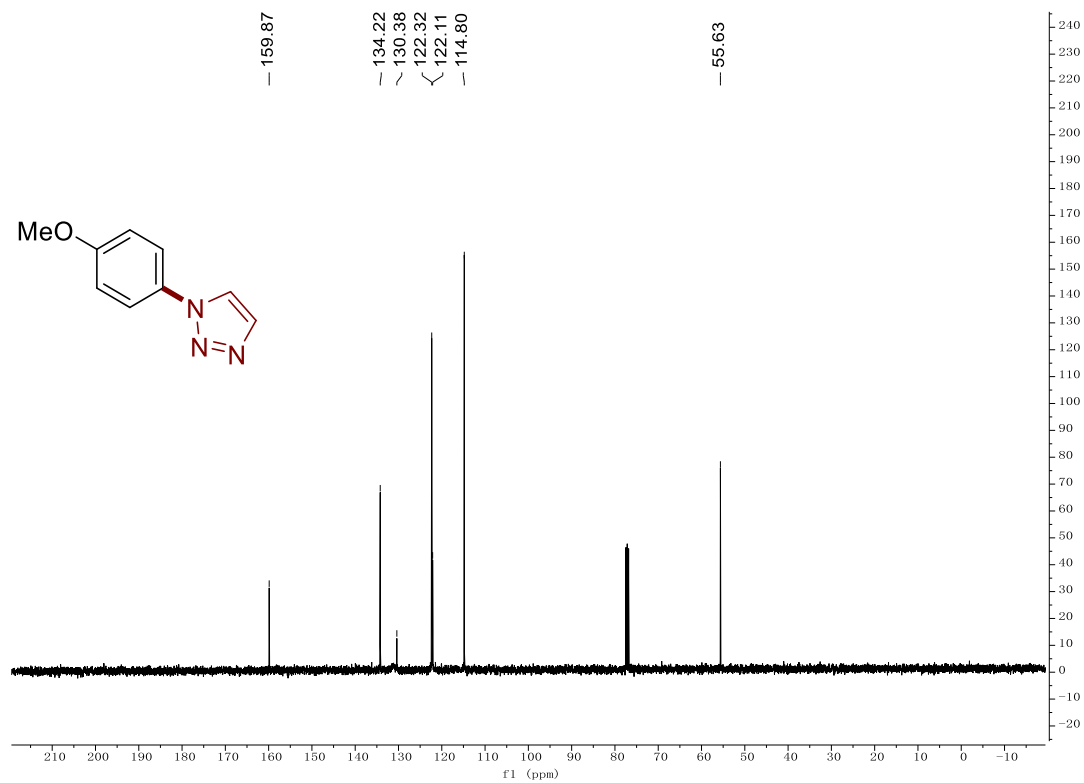

# <sup>1</sup>H NMR Spectrum of 4k (400 MHz, CDCl<sub>3</sub>)

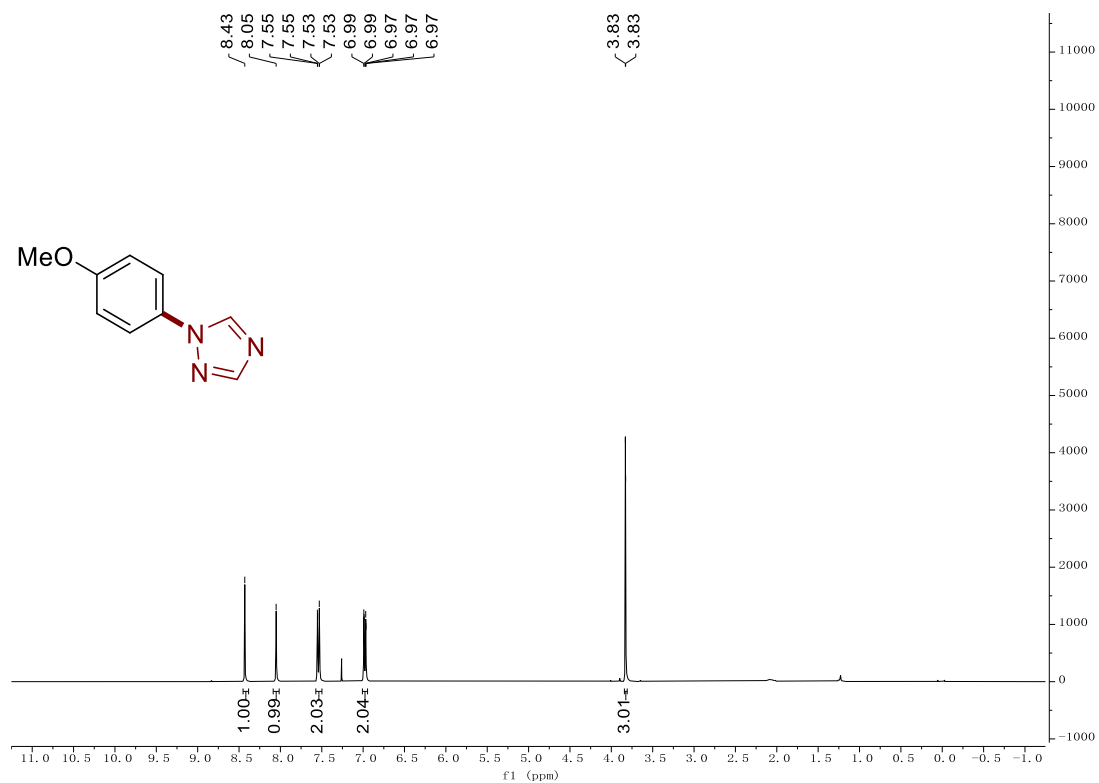

# <sup>13</sup>C NMR Spectrum of 4k(400 MHz, CDCl<sub>3</sub>)

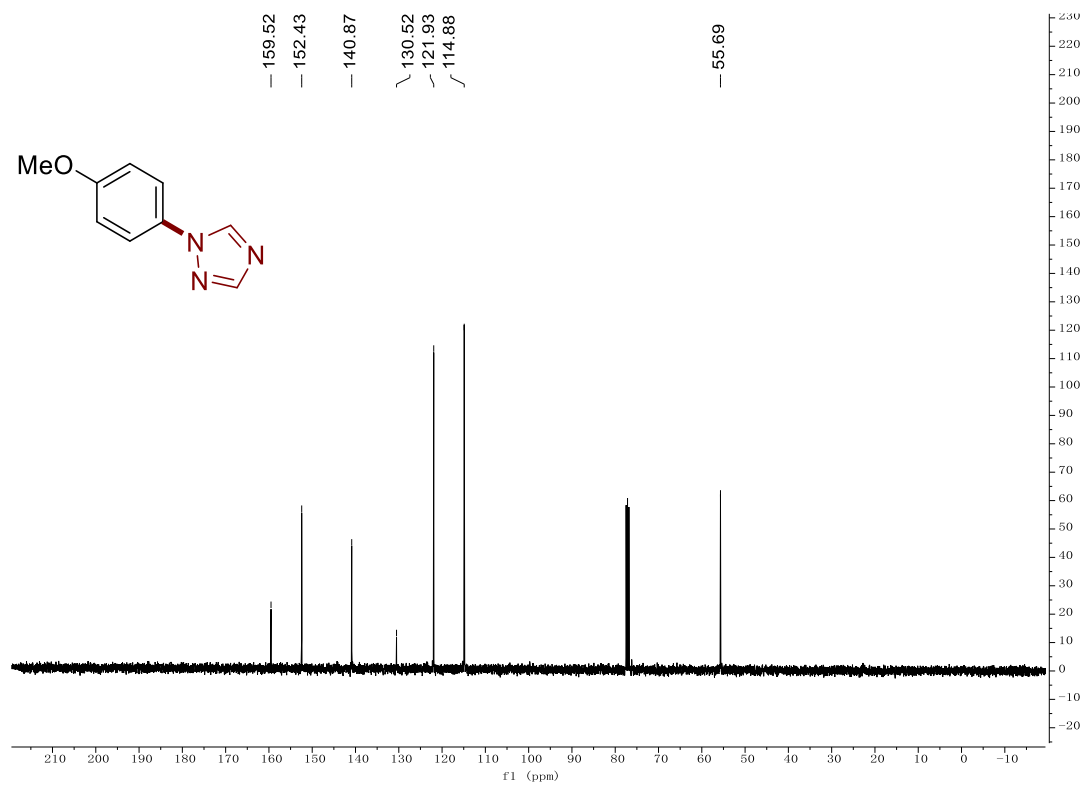

Supplement: d3ob01041d1.pdf [file d3ob01041d1.pdf]
